# Supplementary material for: Comprehensive analysis of the role of ICOS ( CD278 ) in pan-cancer prognosis and immunotherapy
Source: Springer Nature journal article supplement (doi:10.1186/s12885-023-10564-4), 2023-02-28
Supplement: MOESM1 [file 12885_2023_10564_MOESM1_ESM.pdf]

Pared-samples T test

The expression of ICOS  
Log<sub>2</sub> (TPM+1)

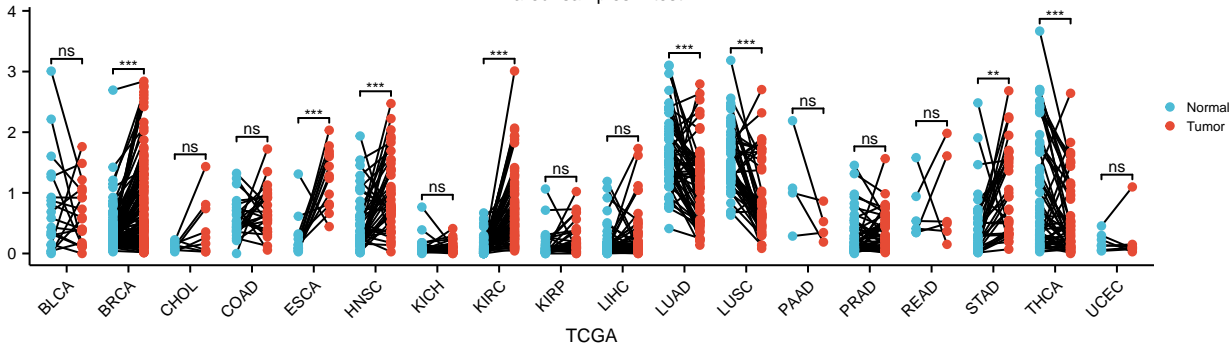

Supplementary Figure 1. The expression of ICOS in pan cancer was analyzed using paired tumor normal samples from TCGA and GTEx databases.
