# Supplementary material for: Comprehensive analysis of the role of ICOS ( CD278 ) in pan-cancer prognosis and immunotherapy
Source: Springer Nature journal article supplement (doi:10.1186/s12885-023-10564-4), 2023-02-28
Supplement: MOESM2 [file 12885_2023_10564_MOESM2_ESM.pdf]

# Cancer: CESC

ICOS levels + high + low

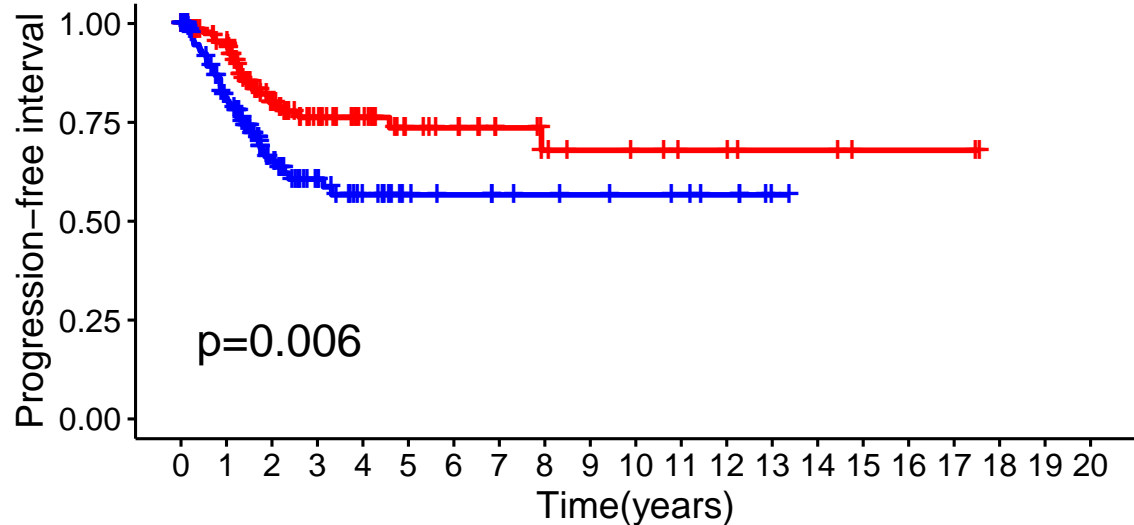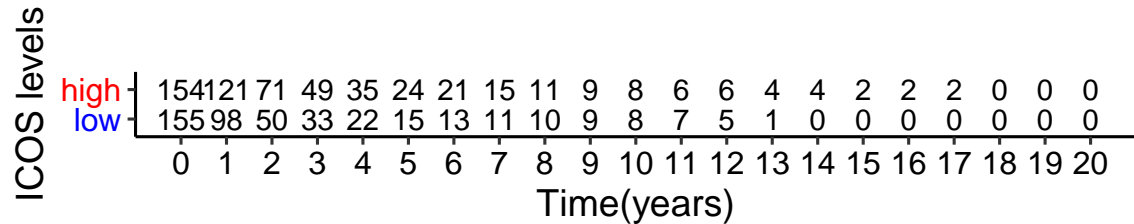

# Cancer: COAD

ICOS levels + high + low

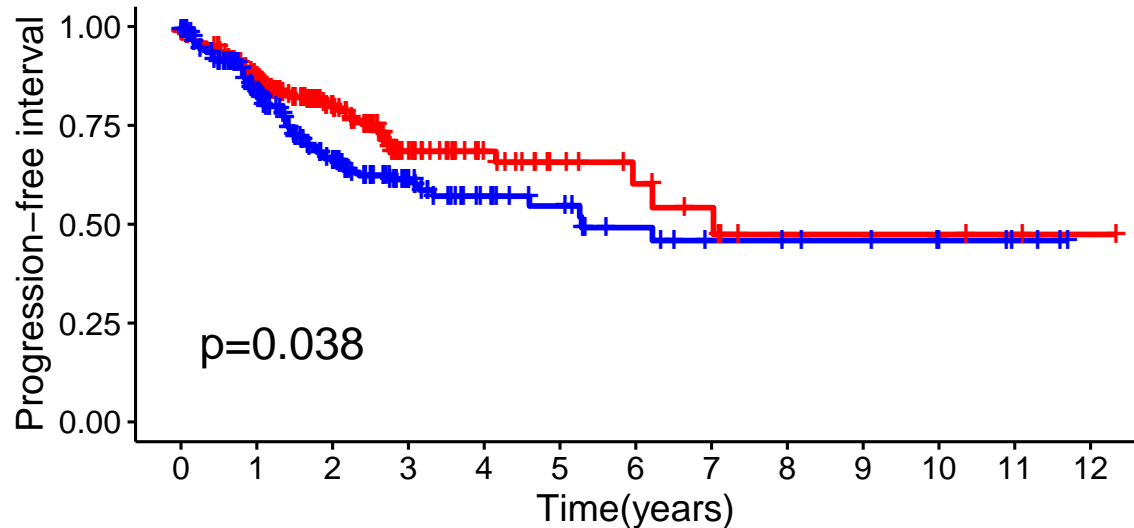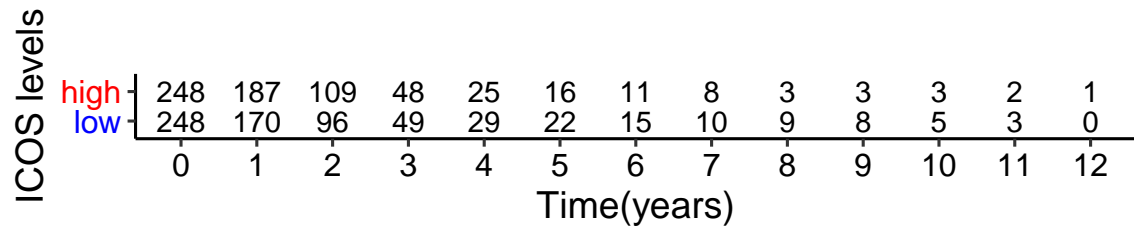

# Cancer: GBM

ICOS levels + high + low

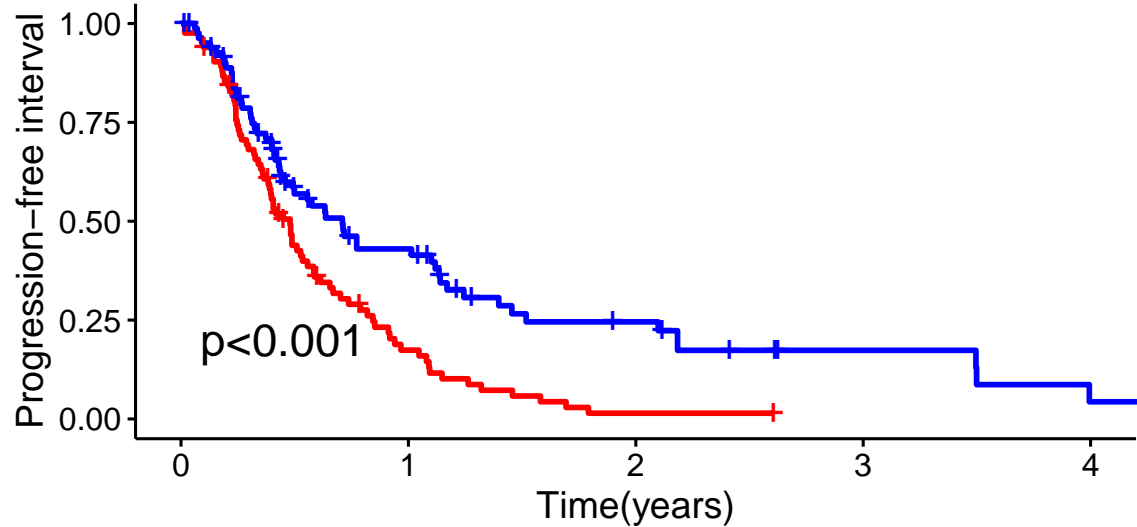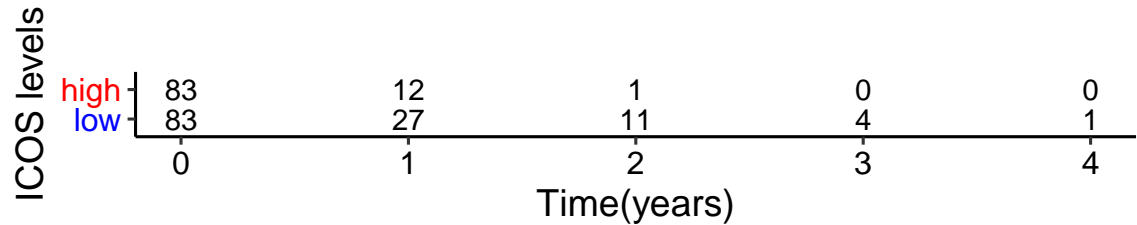



# Cancer: LGG

ICOS levels + high + low

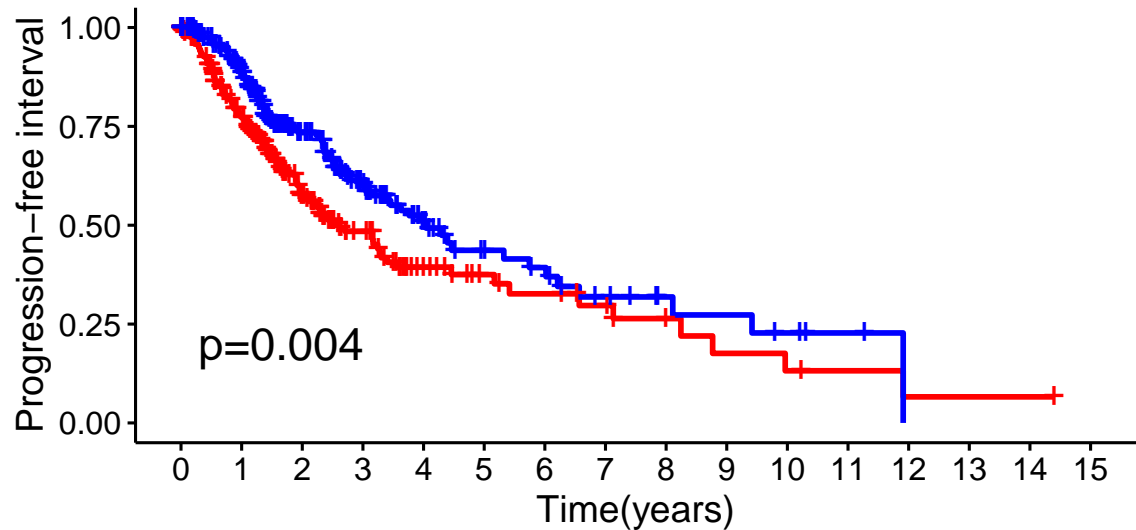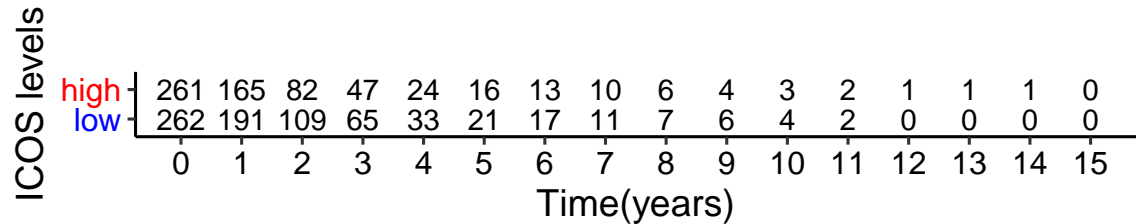

# Cancer: LUAD

ICOS levels + high + low

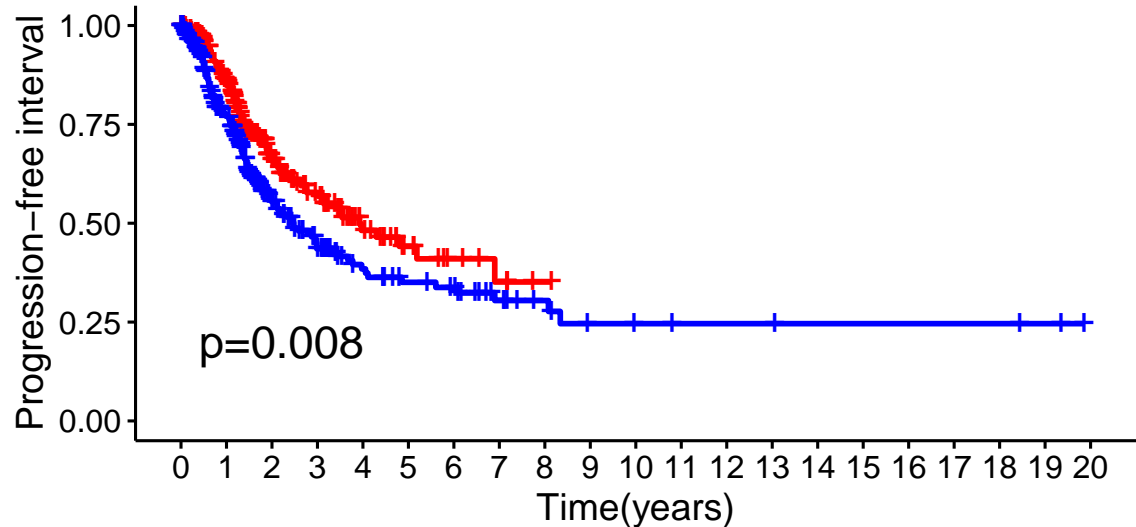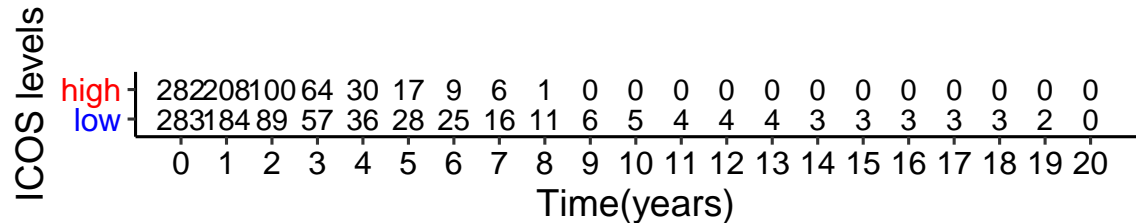

# Cancer: OV

ICOS levels + high + low

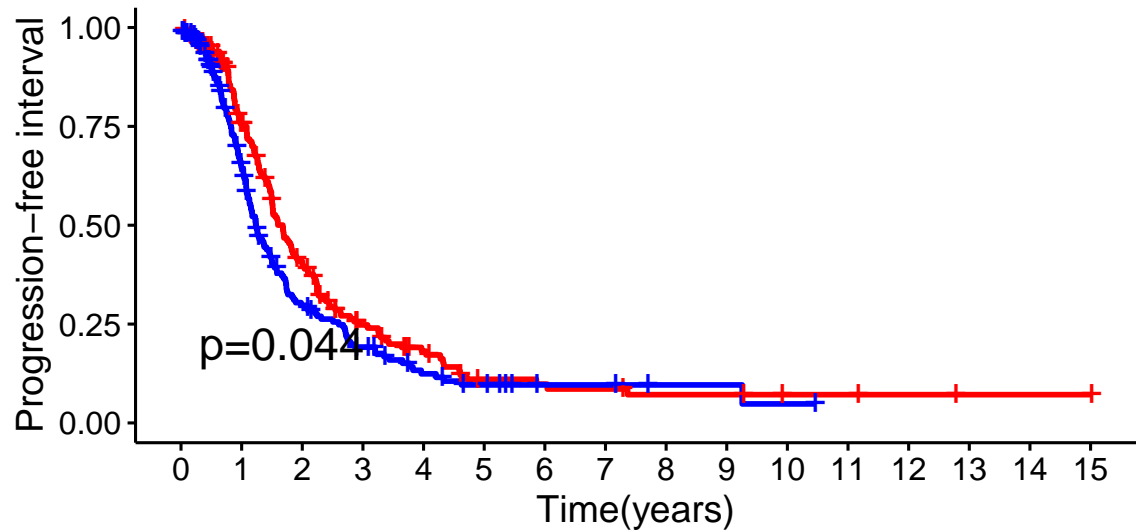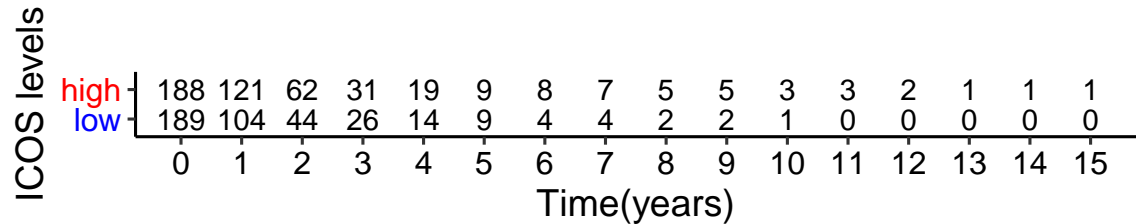



Supplementary Figure 2. Survival curve analysis of ICOS gene expression in different tumor types.
