# Supplementary material for: Comprehensive analysis of the role of ICOS ( CD278 ) in pan-cancer prognosis and immunotherapy
Source: Springer Nature journal article supplement (doi:10.1186/s12885-023-10564-4), 2023-02-28
Supplement: MOESM3 [file 12885_2023_10564_MOESM3_ESM-1.pdf]

Cancer: ACC

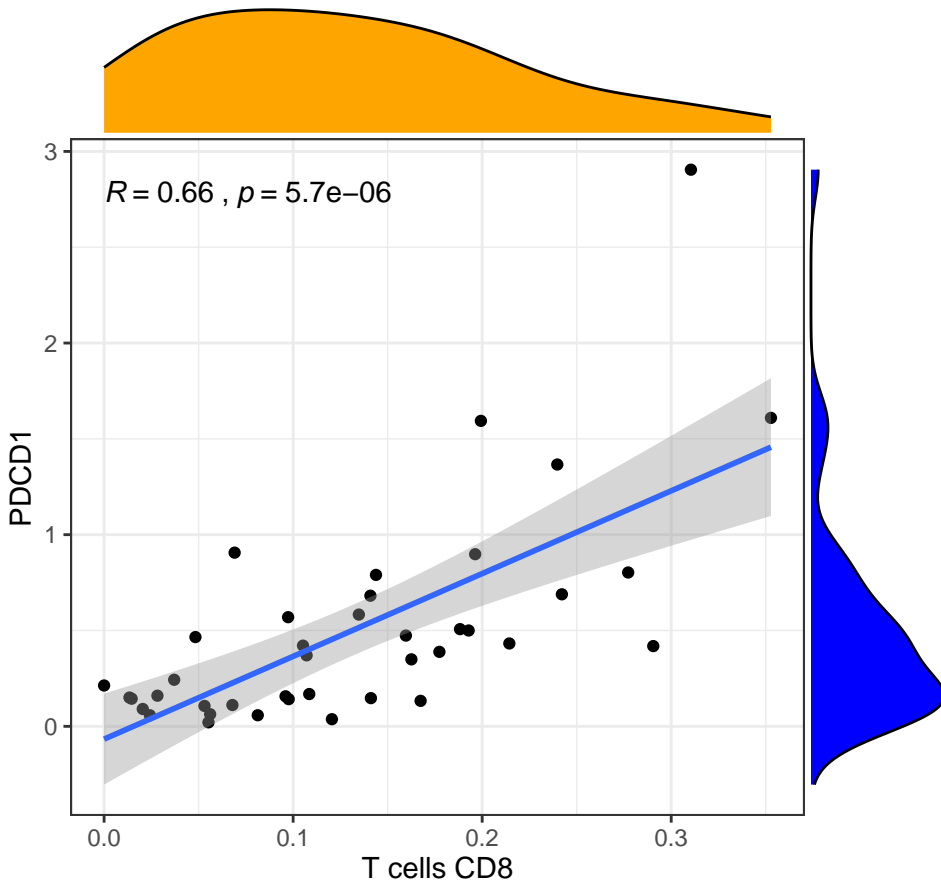

Cancer: ACC

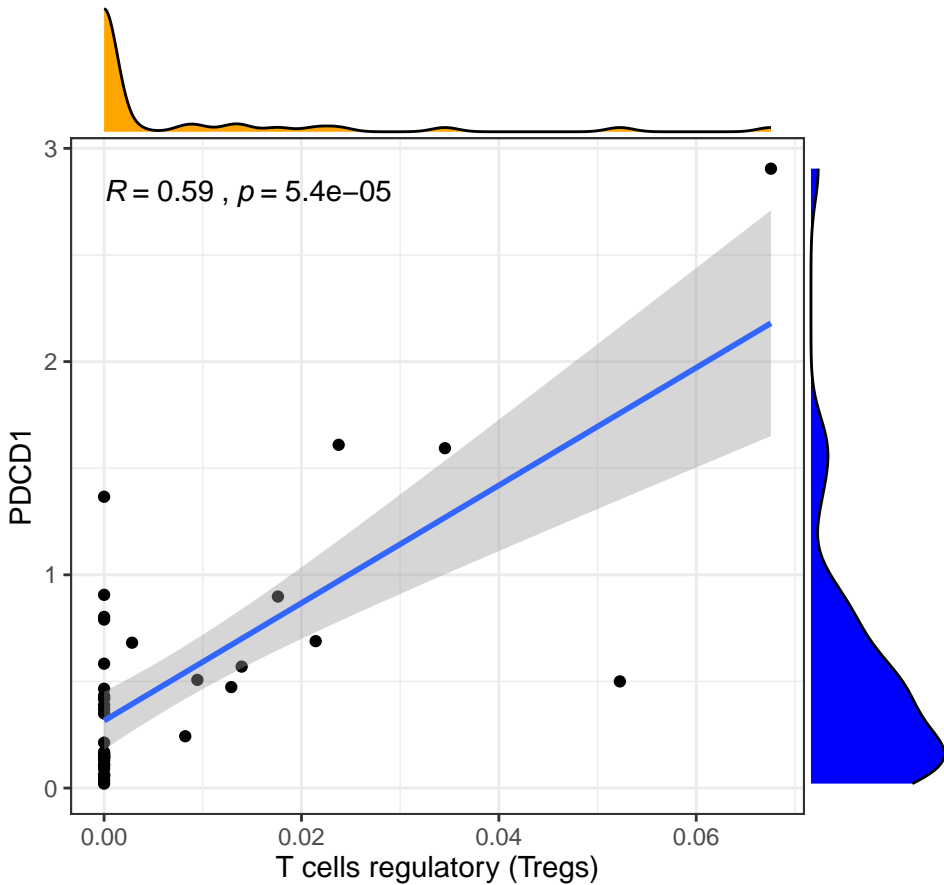

Cancer: BLCA

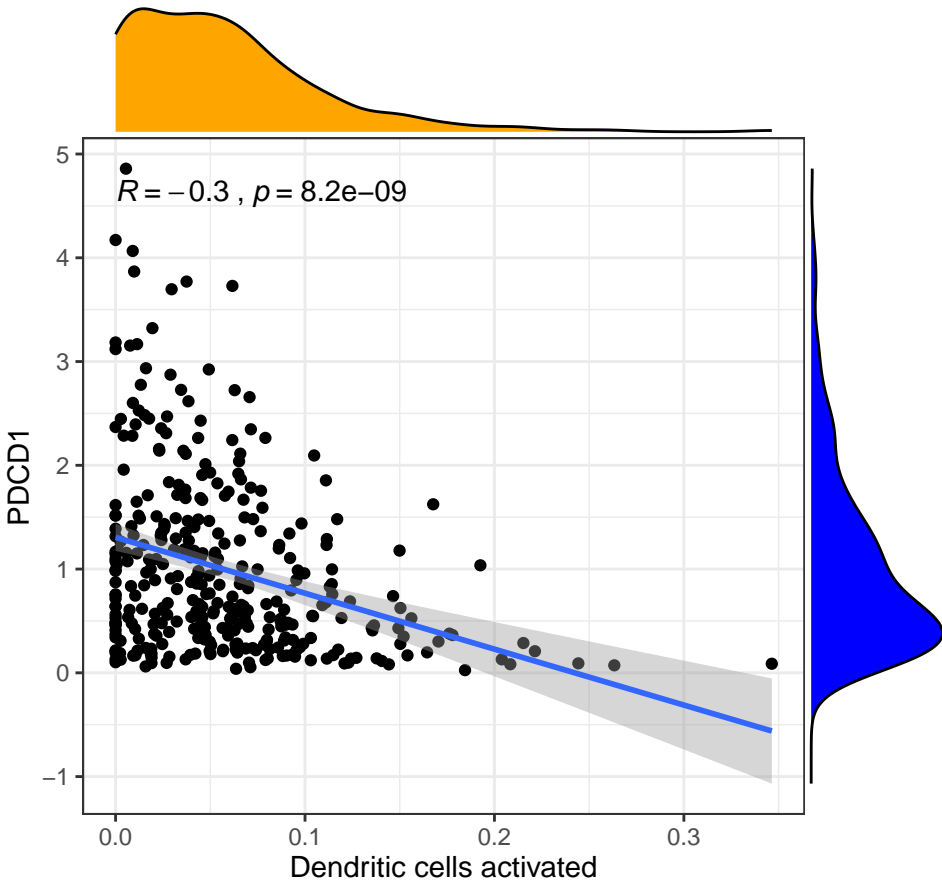

Cancer: BLCA

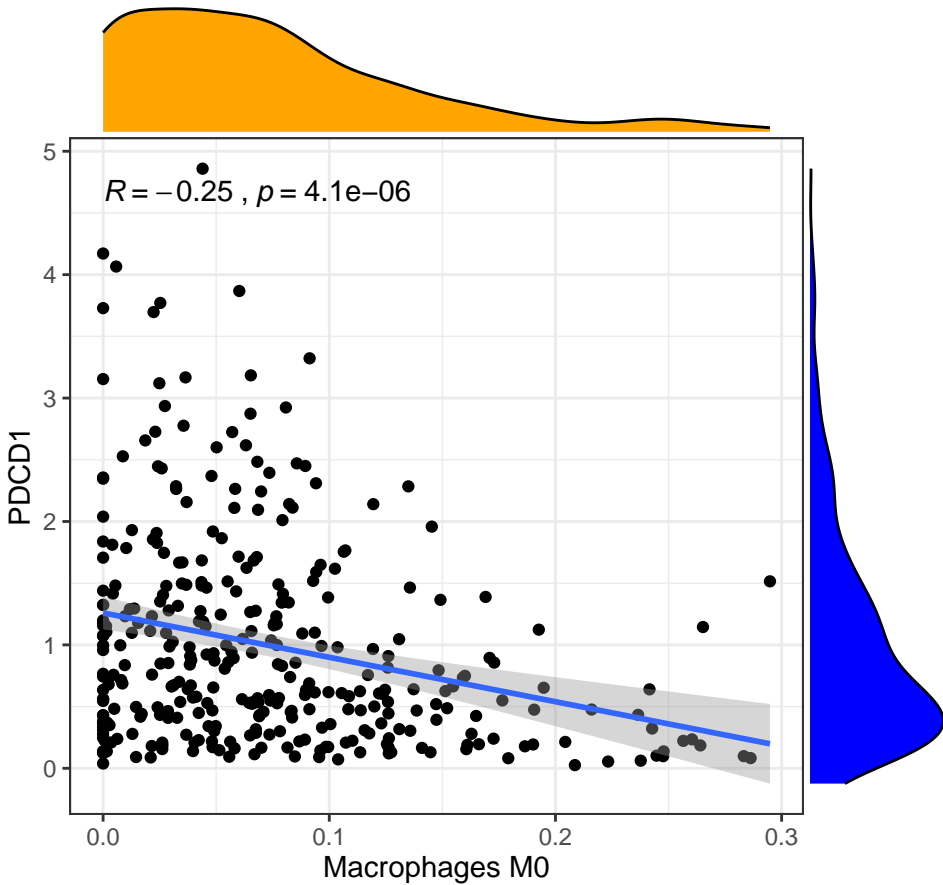

Cancer: BLCA

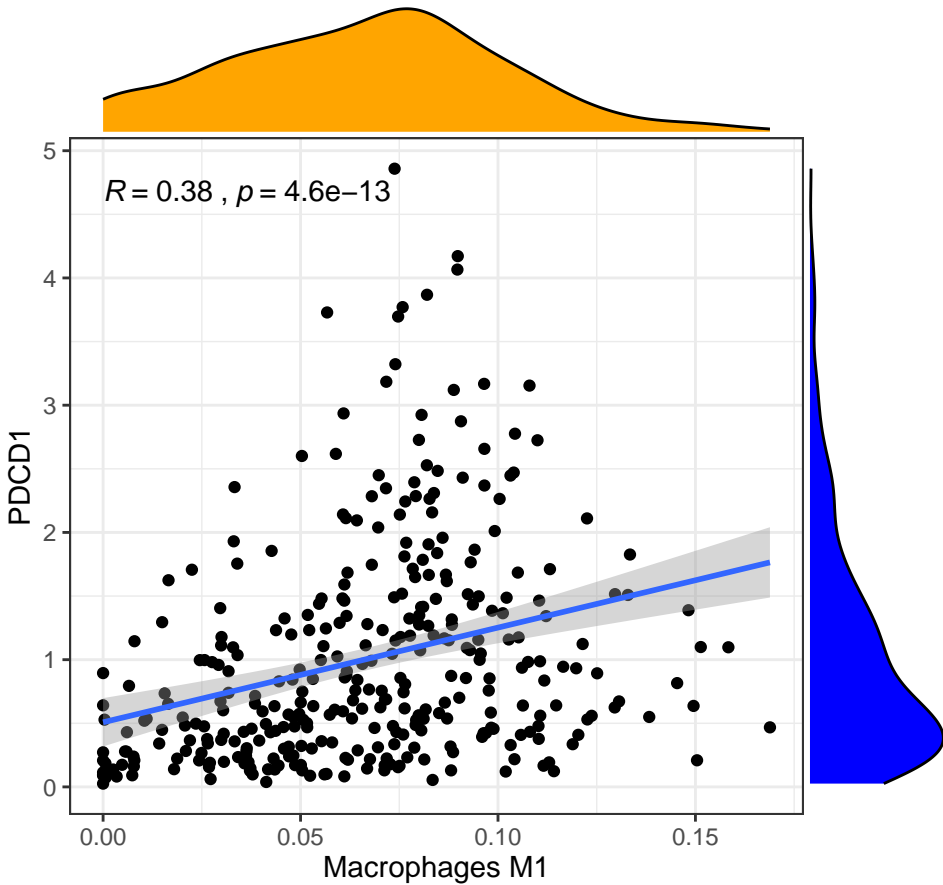

Cancer: BLCA

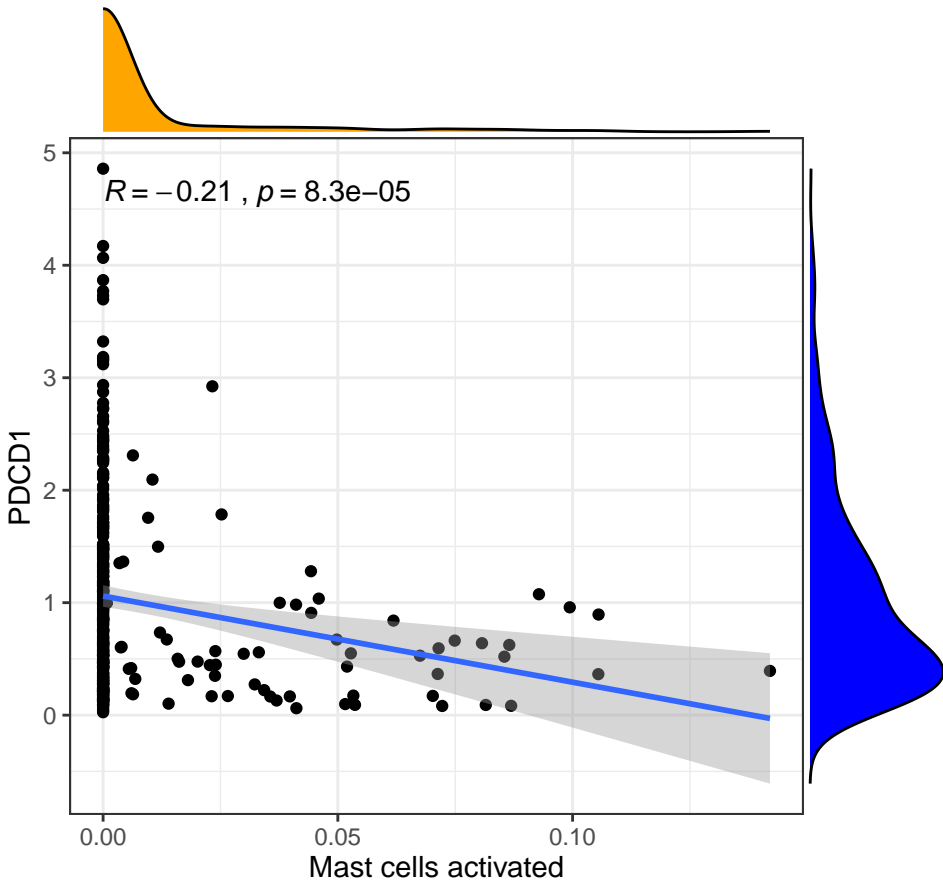

Cancer: BLCA

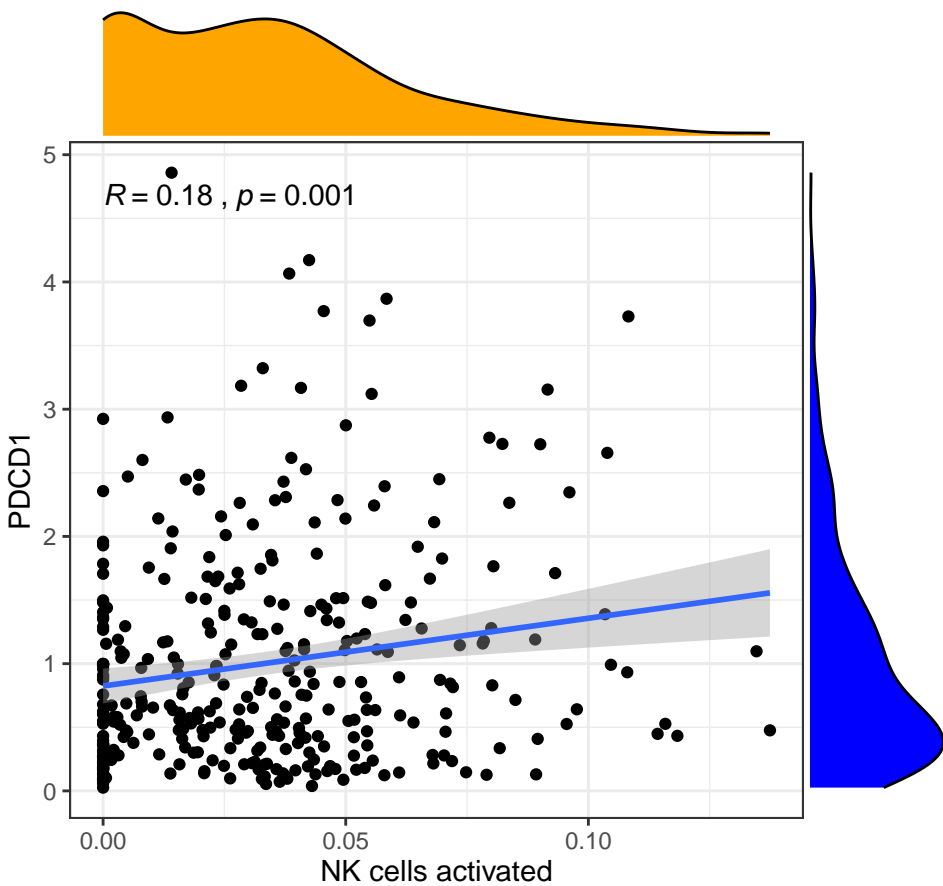

Cancer: BLCA

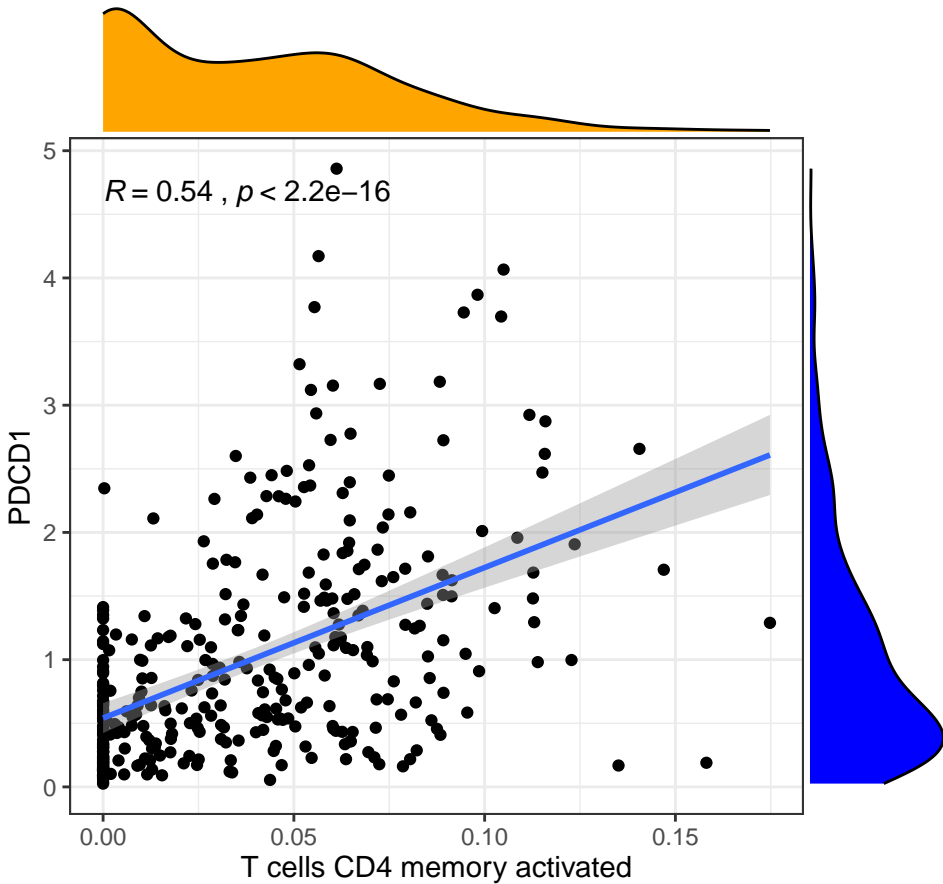

Cancer: BLCA

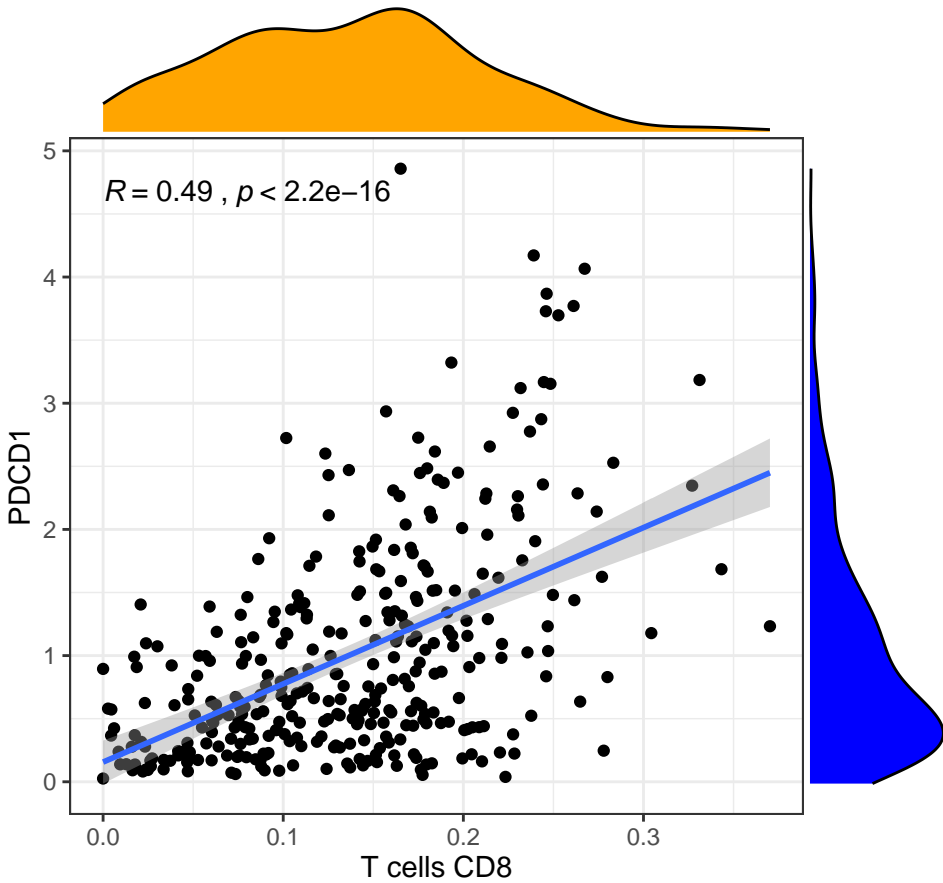

Cancer: CESC

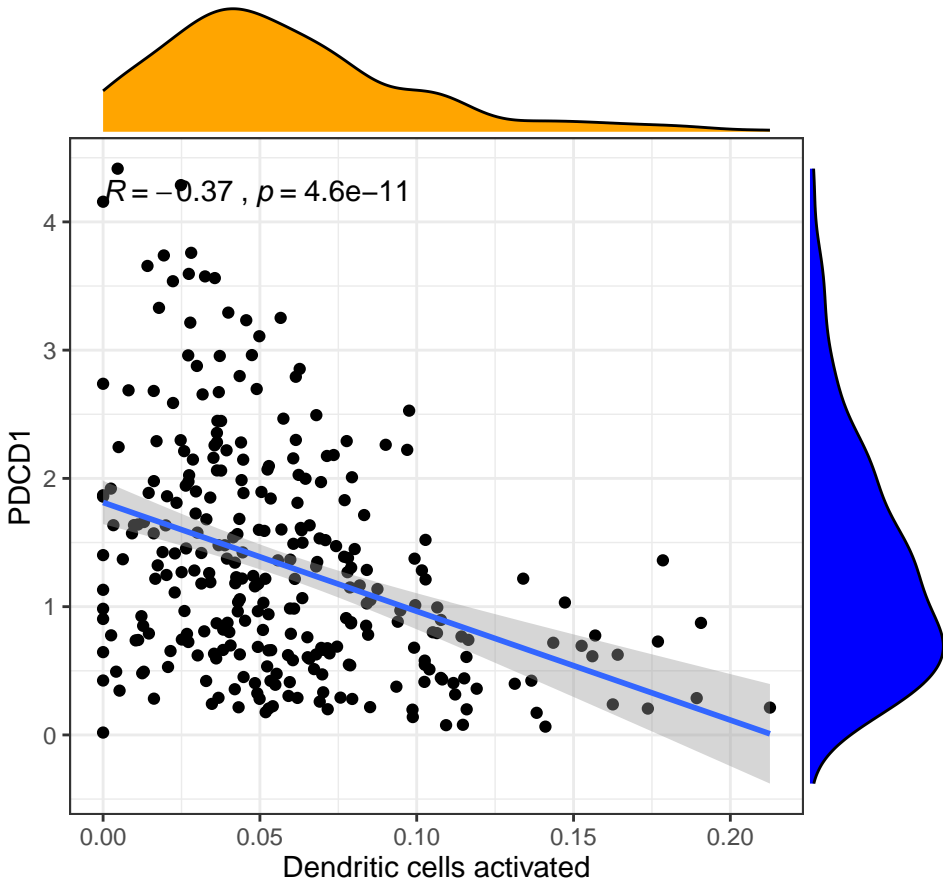

Cancer: CESC

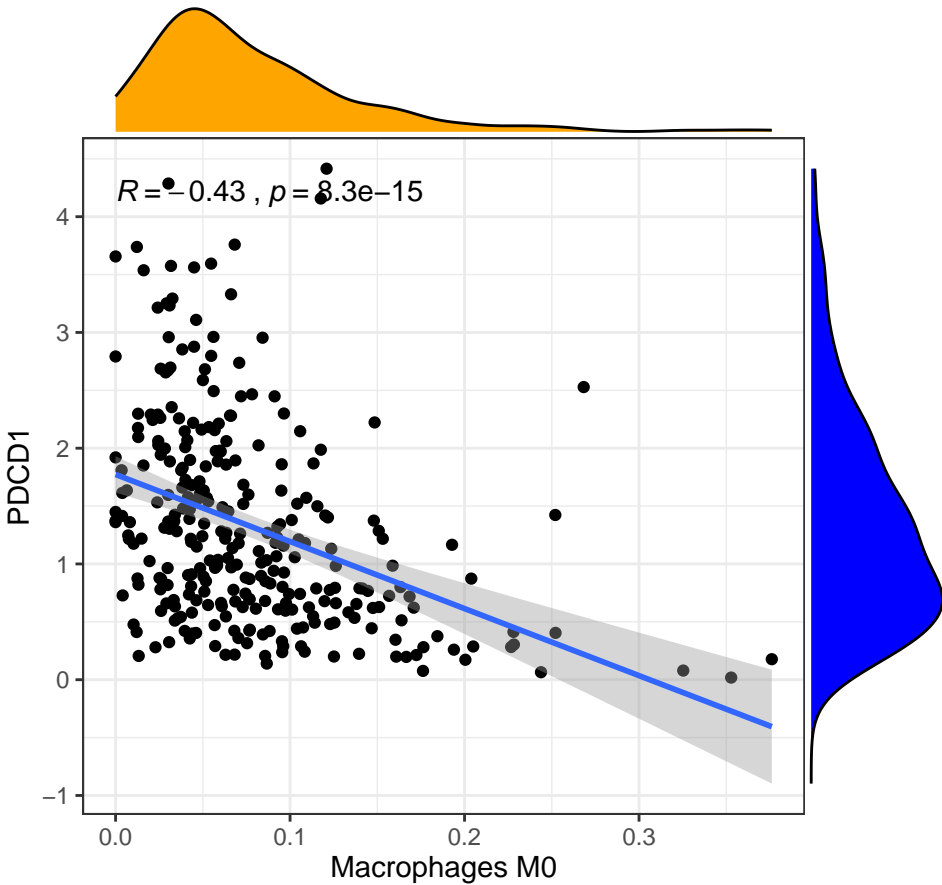

Cancer: CESC

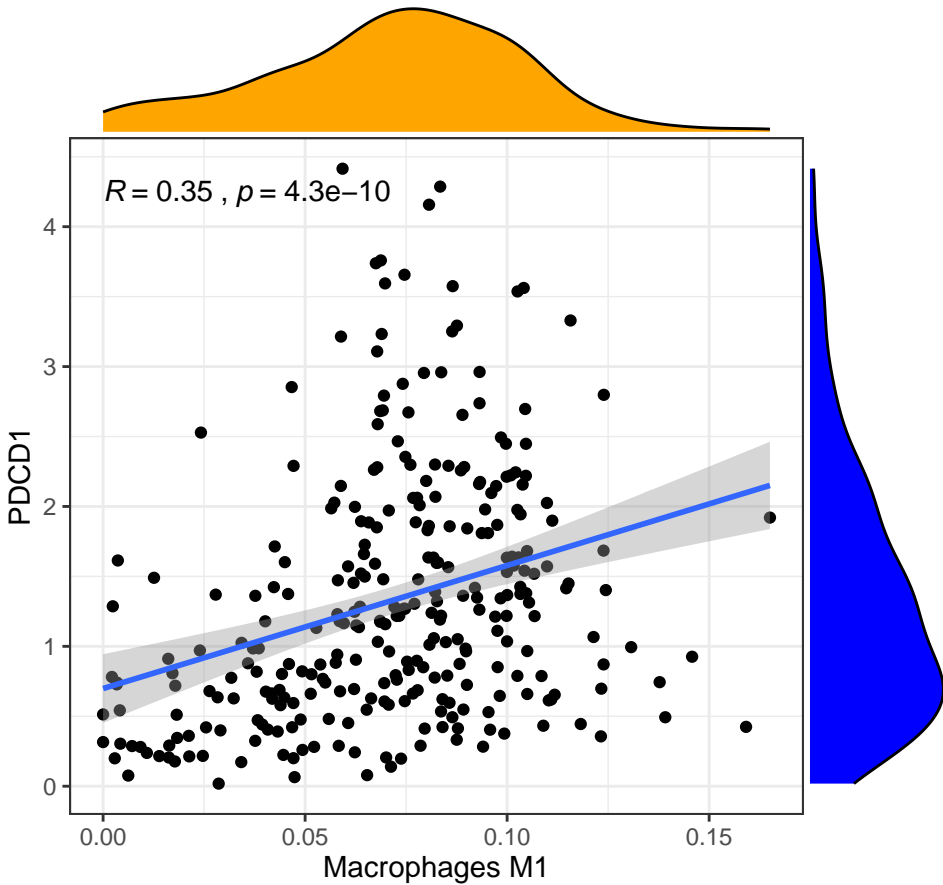

Cancer: CESC

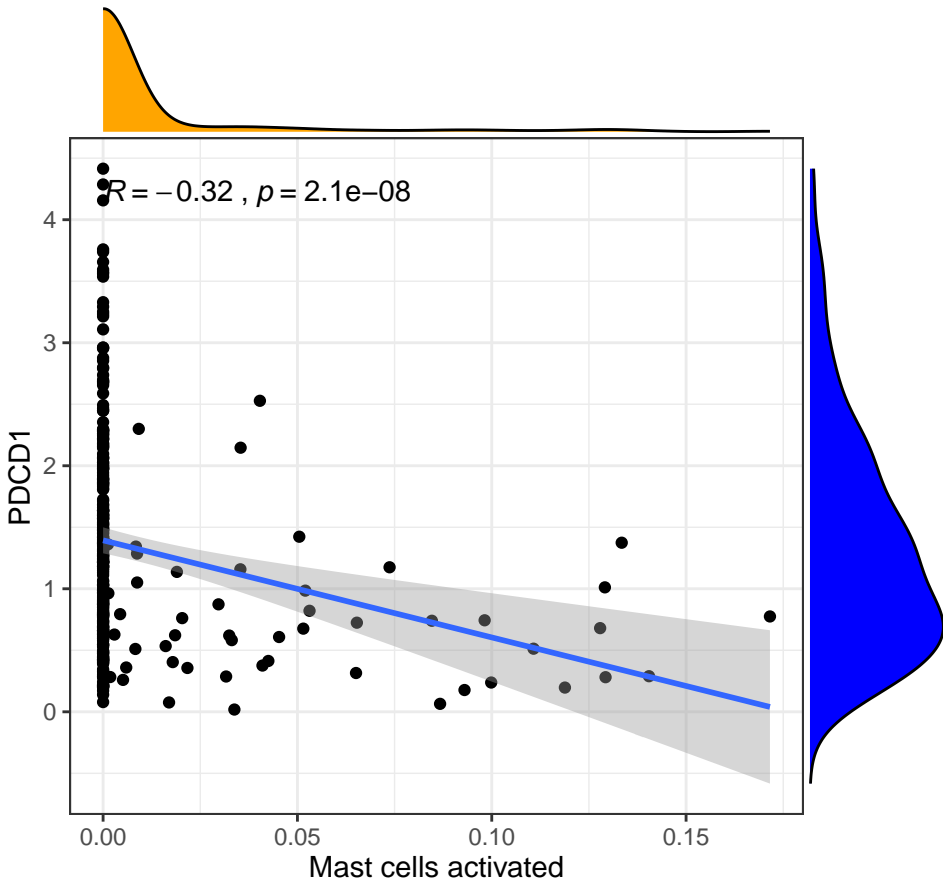

Cancer: CESC

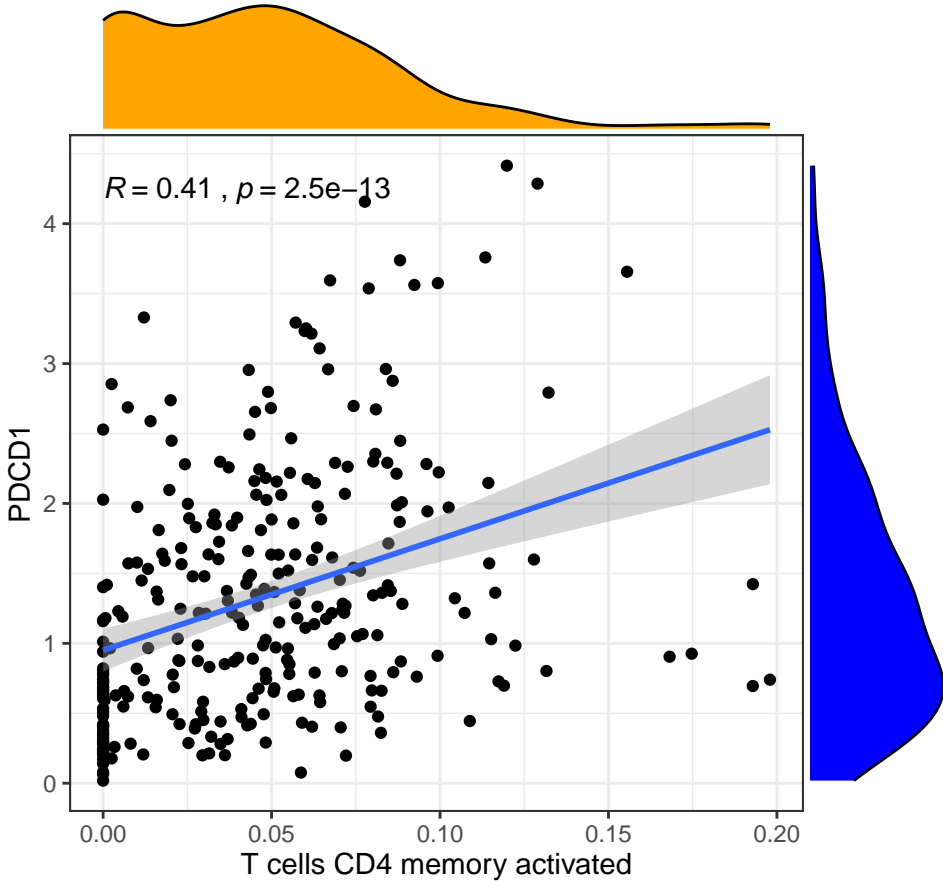

Cancer: CESC

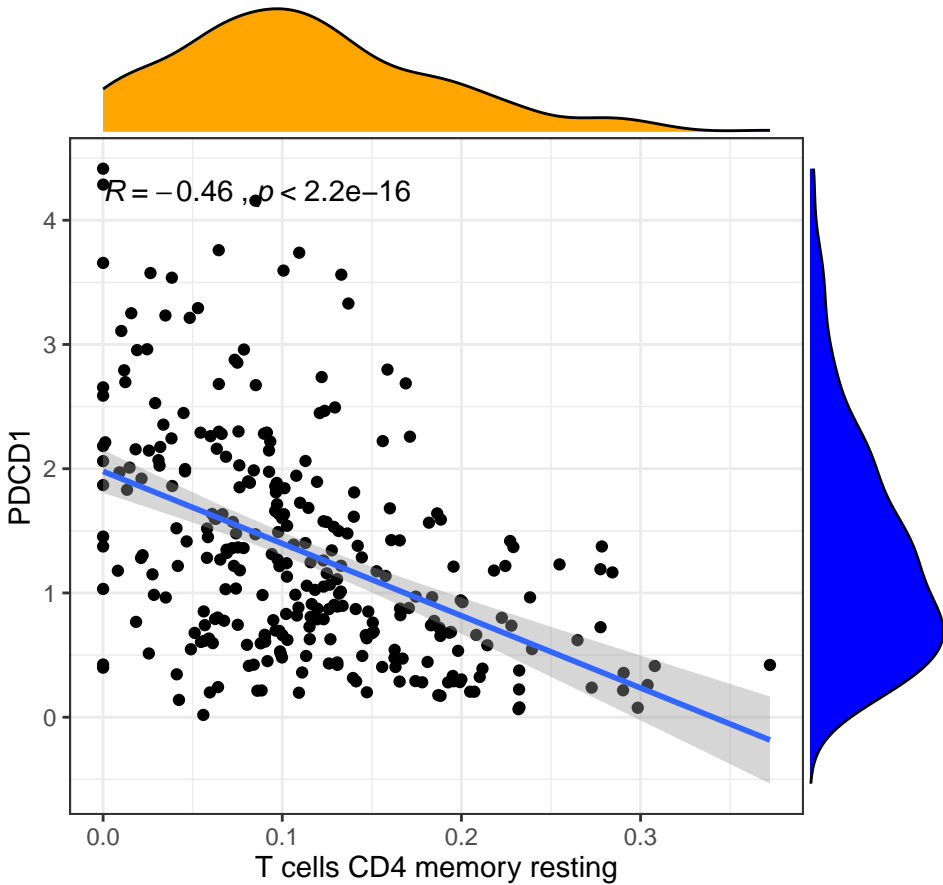

Cancer: CESC

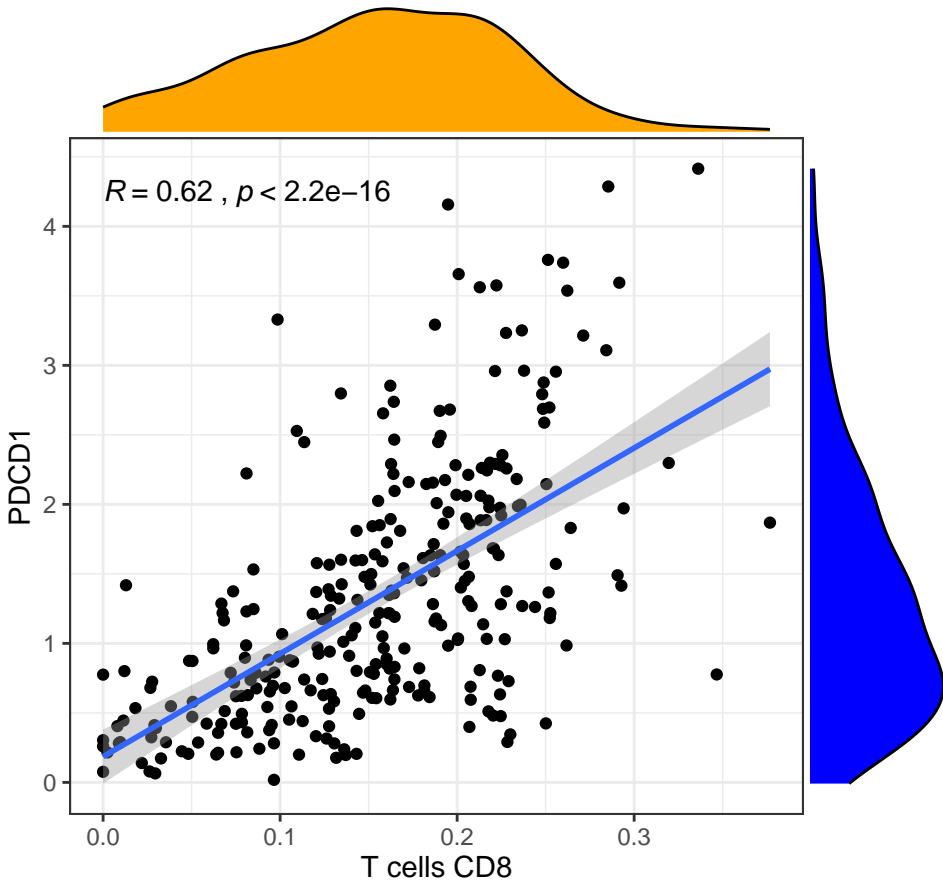

Cancer: CESC

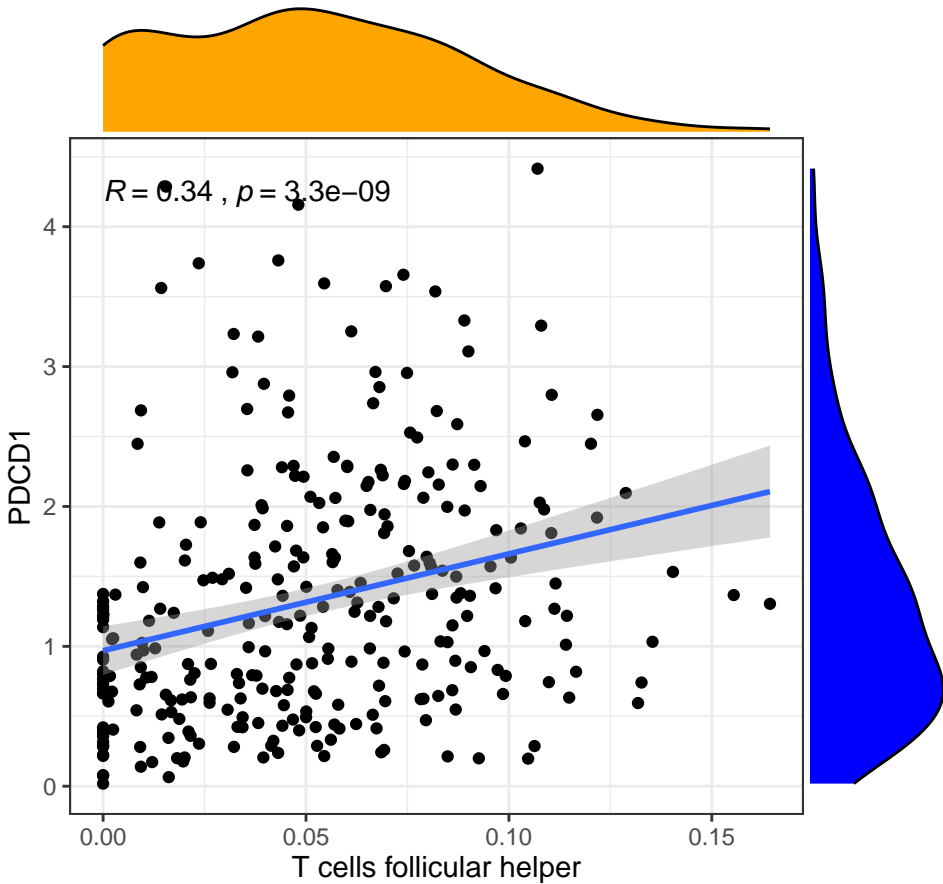

Cancer: CHOL

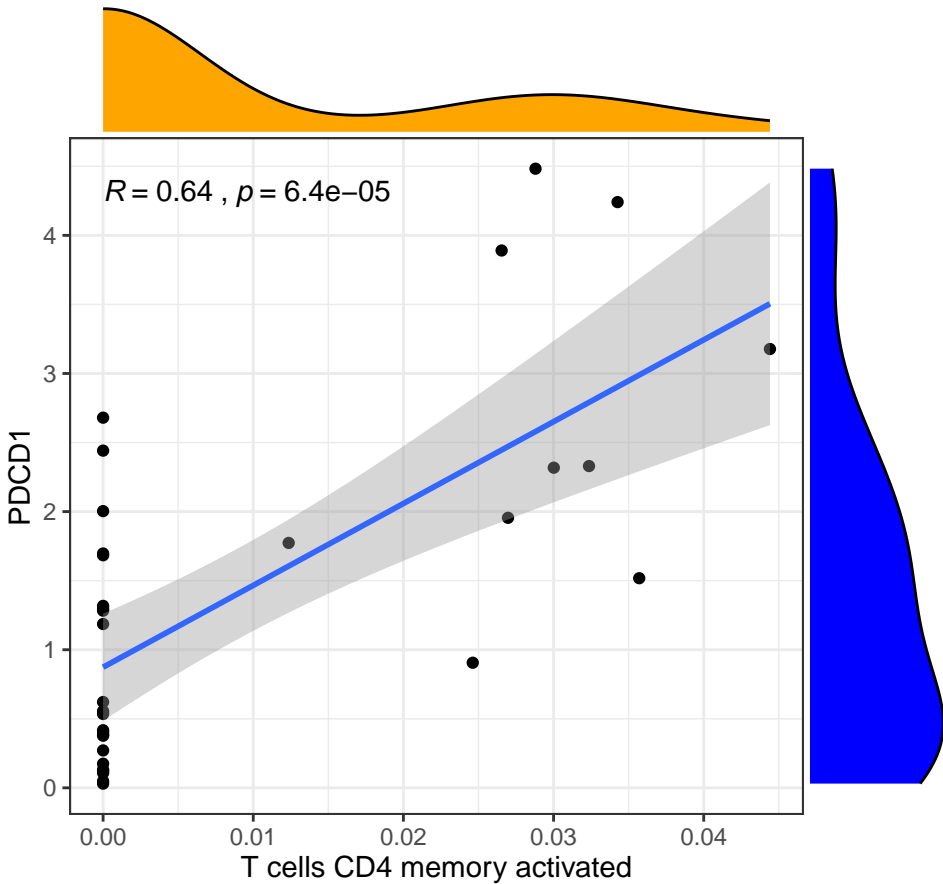

Cancer: COAD

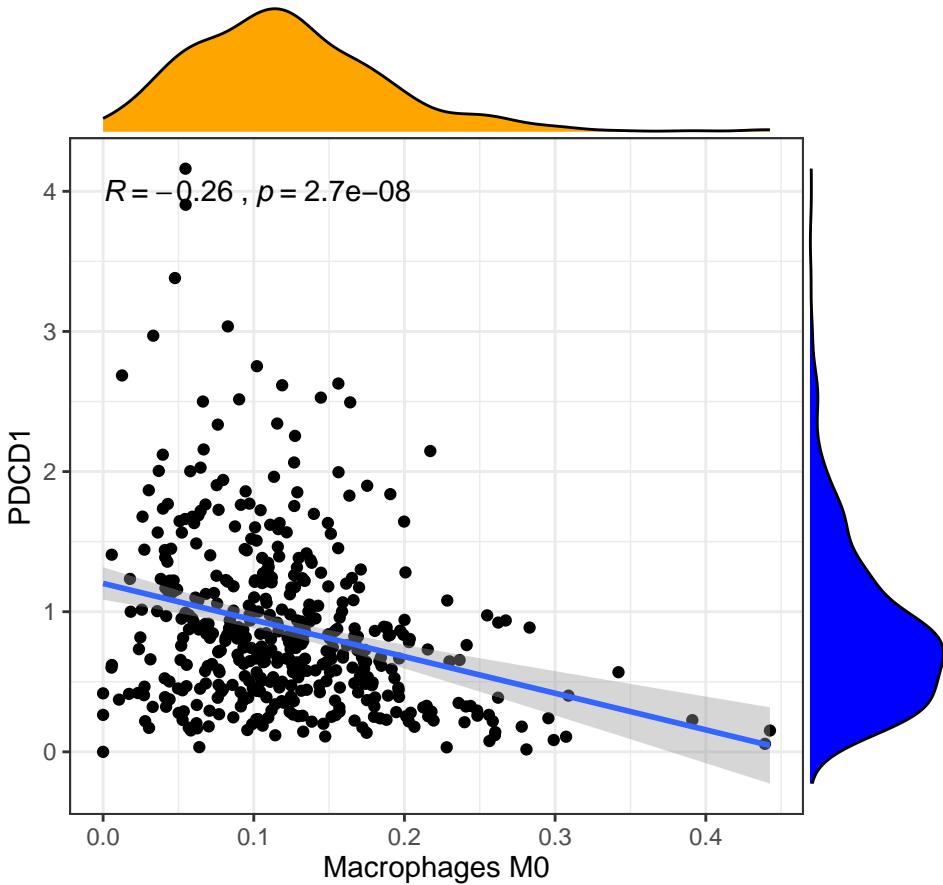

Cancer: COAD

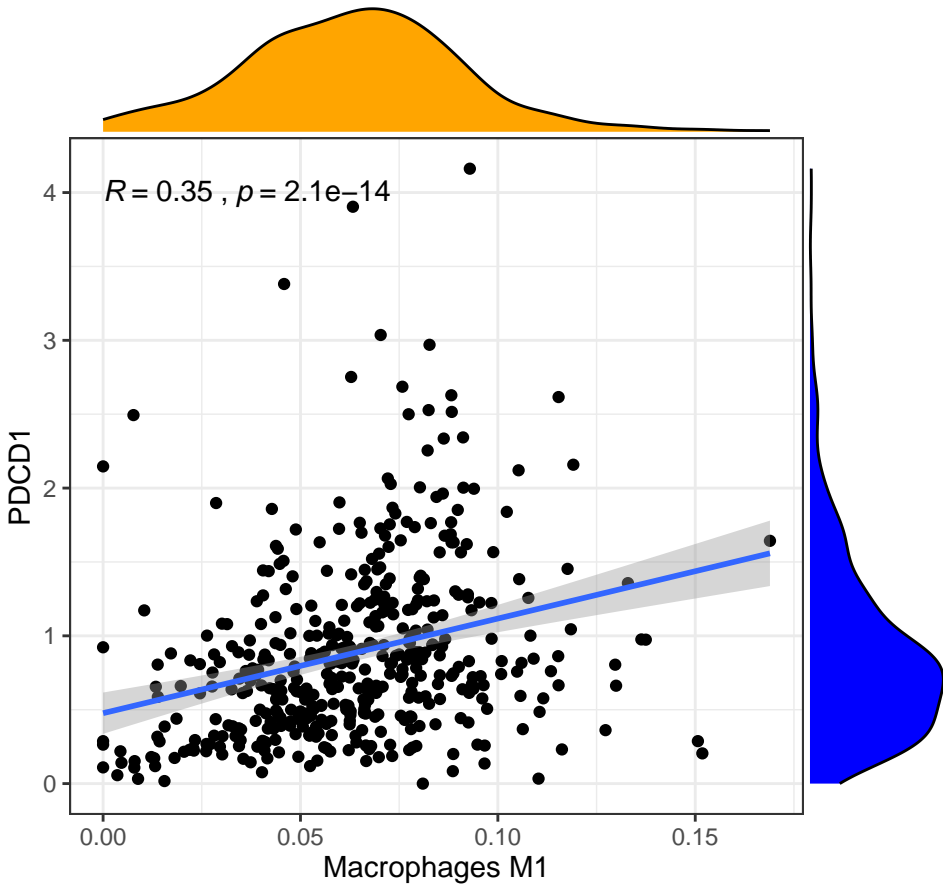

Cancer: COAD

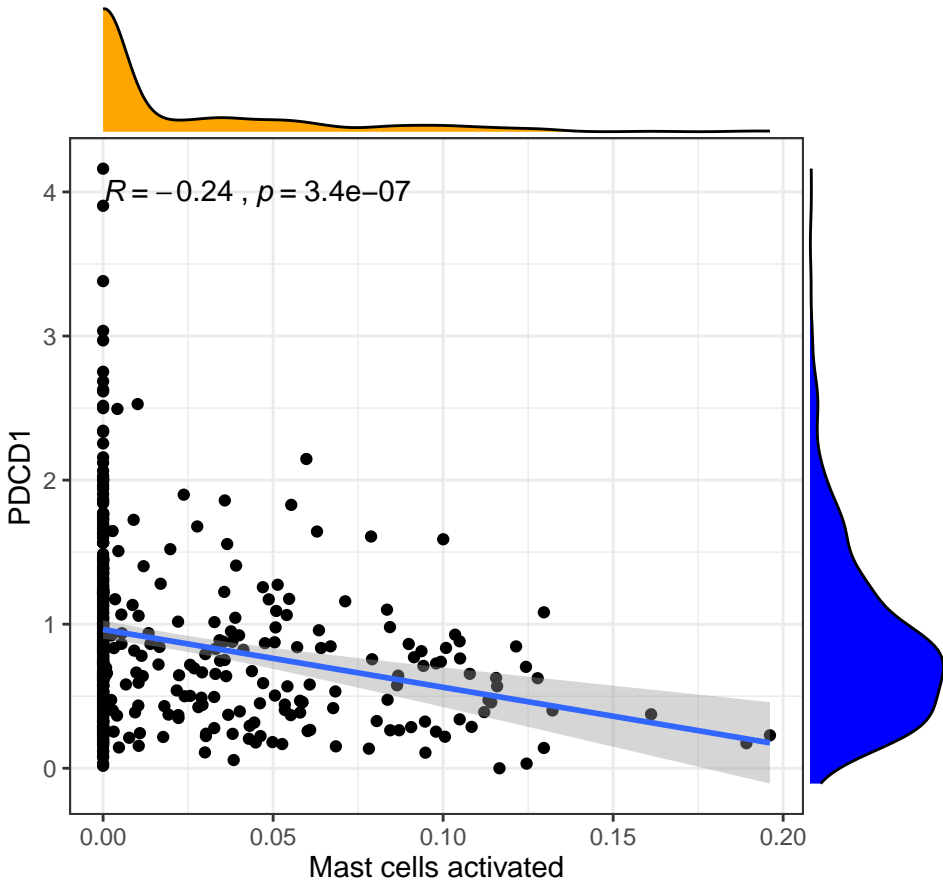

Cancer: COAD

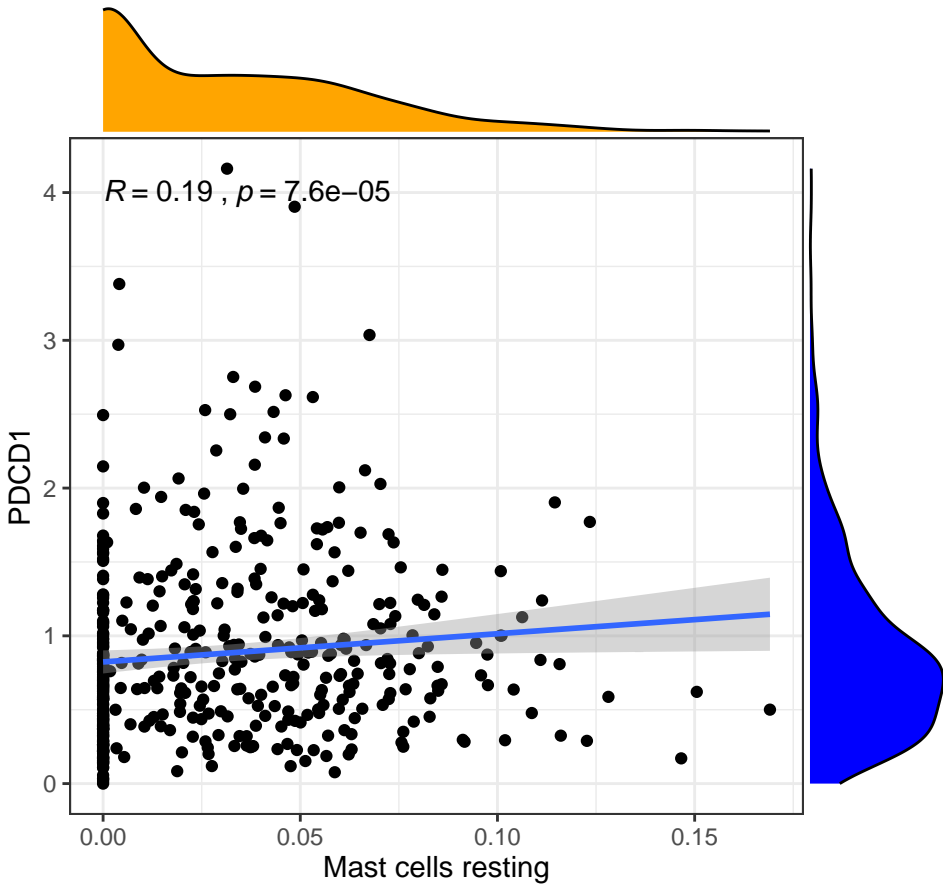

Cancer: COAD

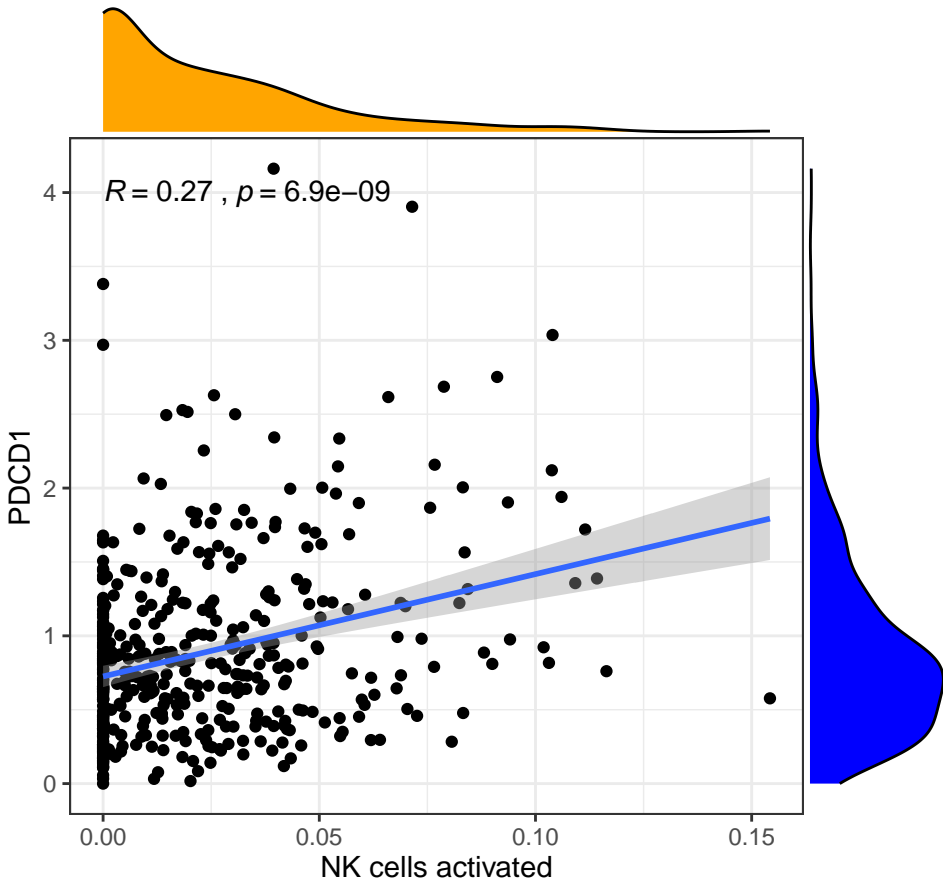

Cancer: COAD

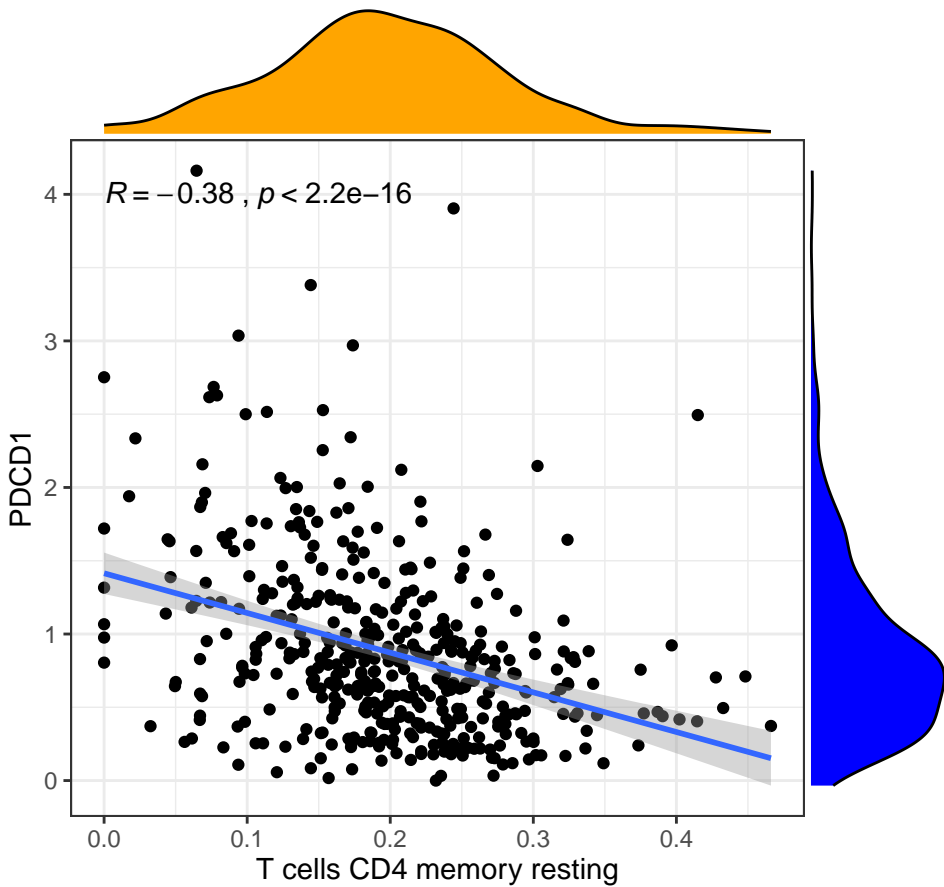

Cancer: COAD

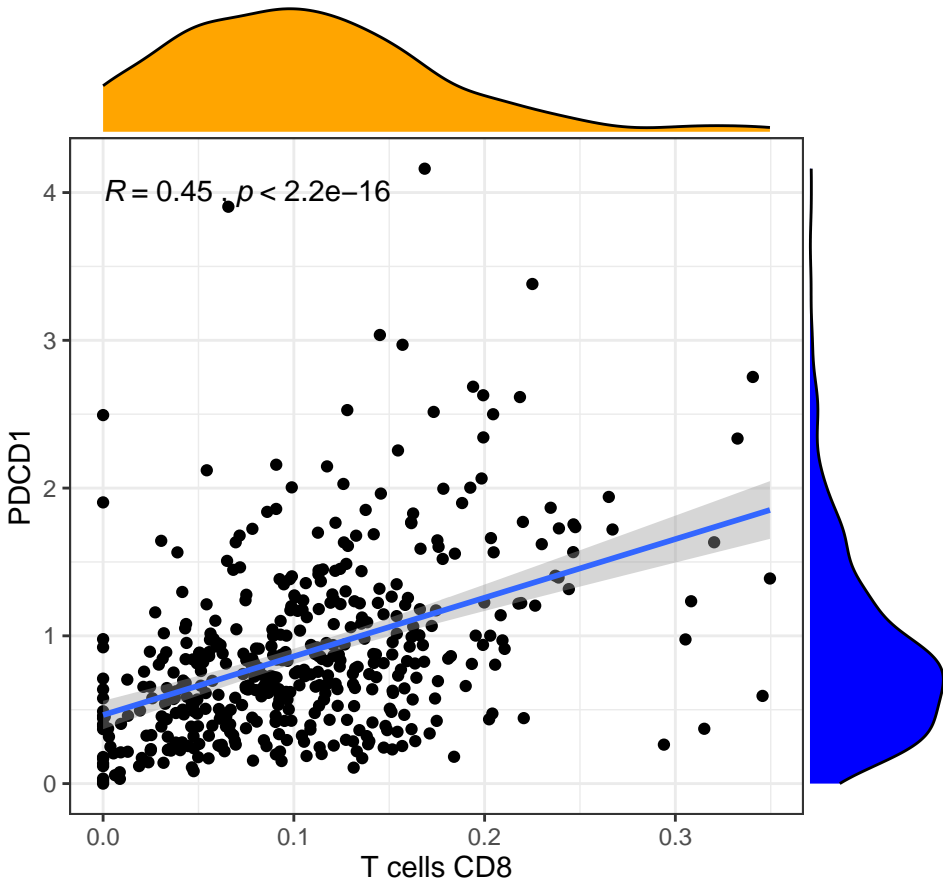

Cancer: COAD

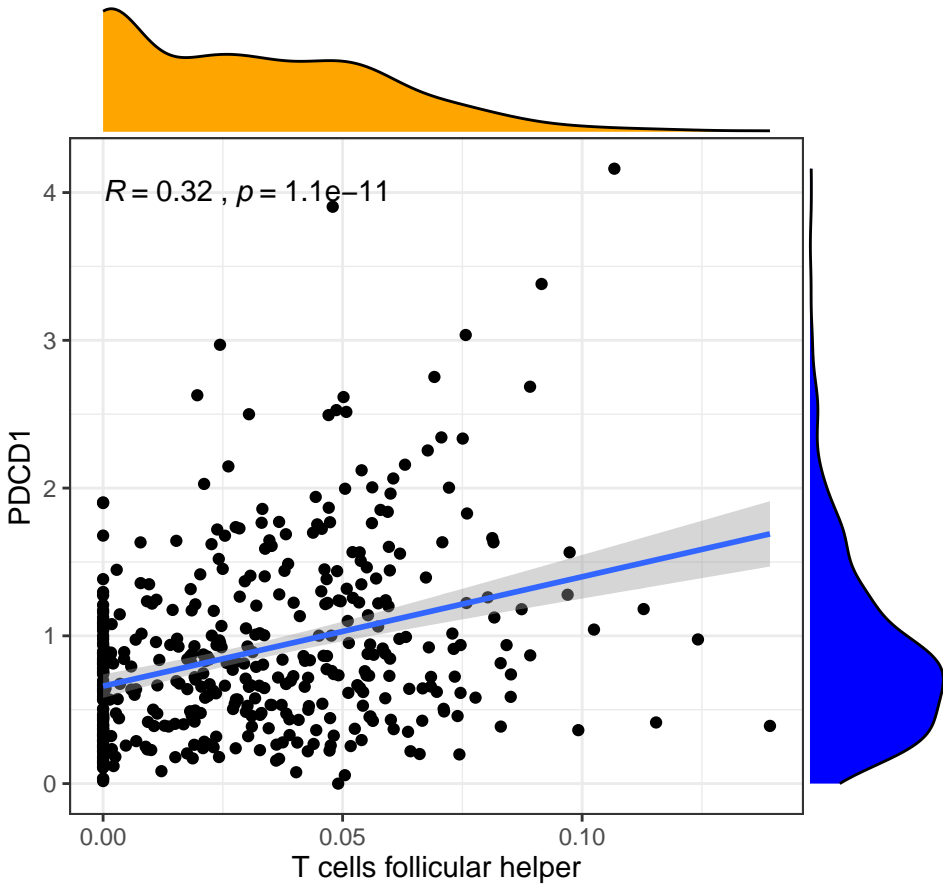

Cancer: ESCA

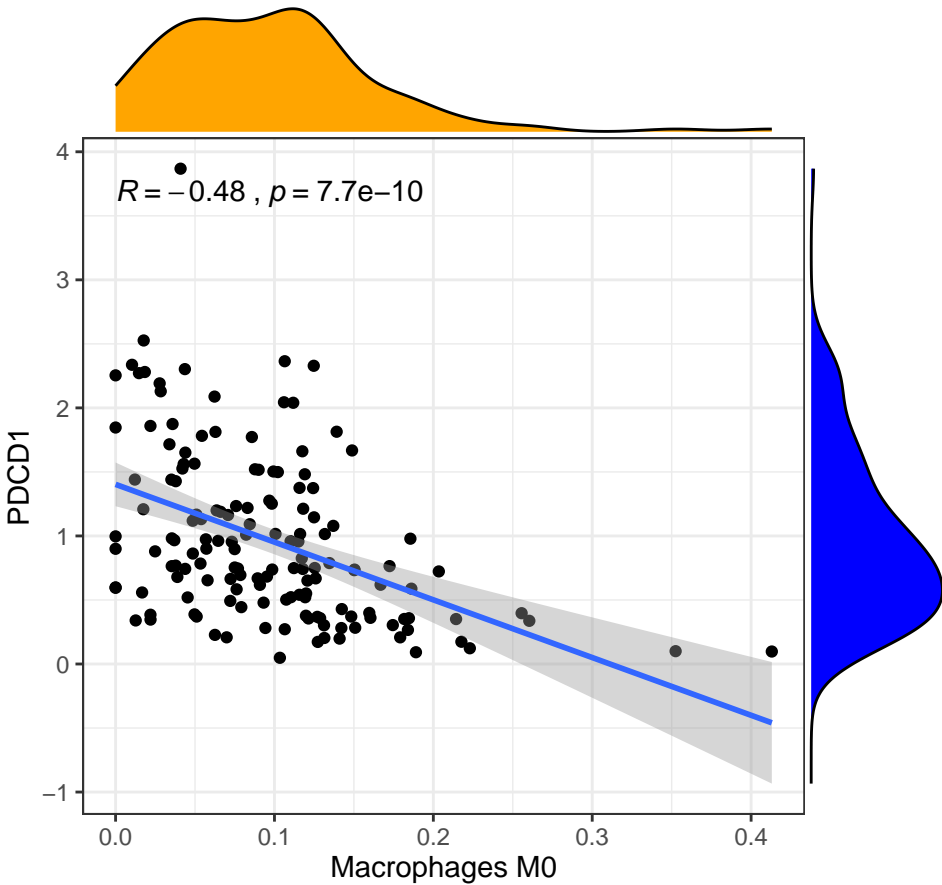

Cancer: ESCA

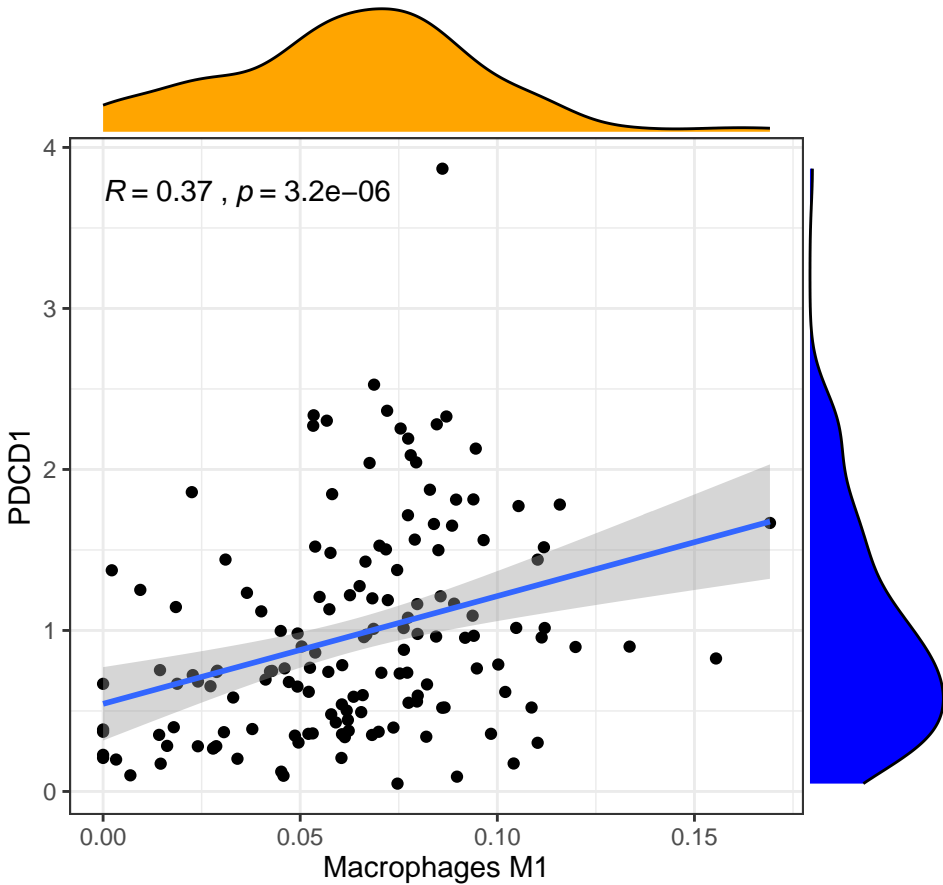

Cancer: ESCA

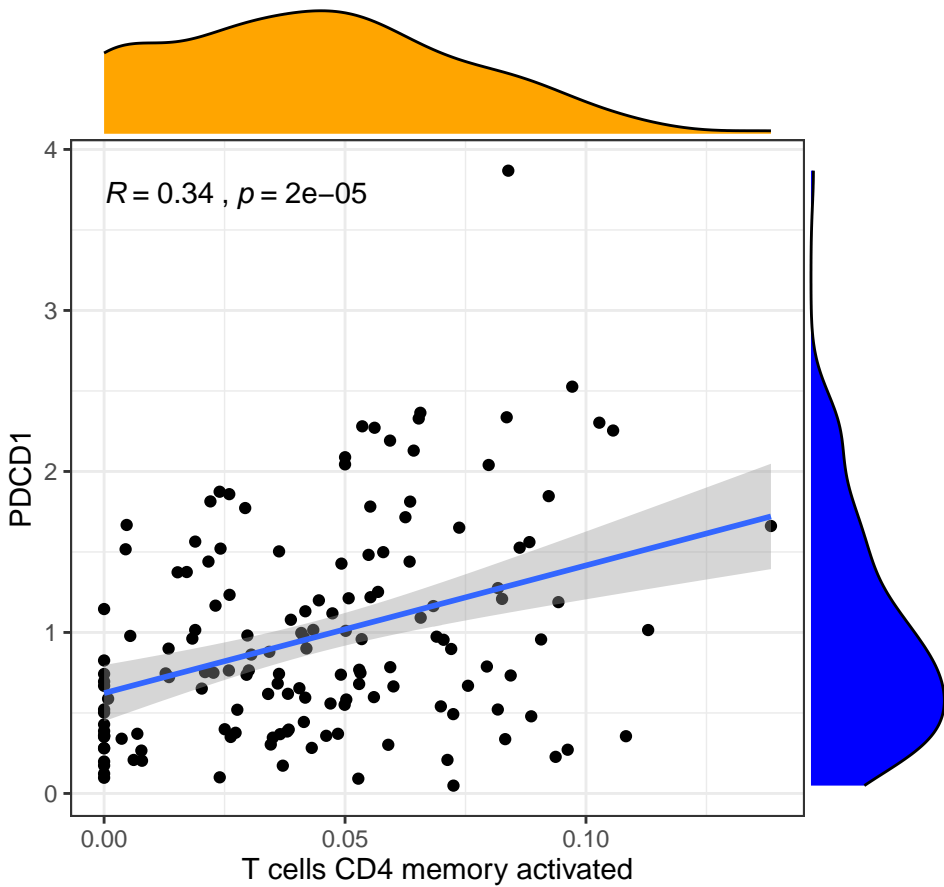

Cancer: ESCA

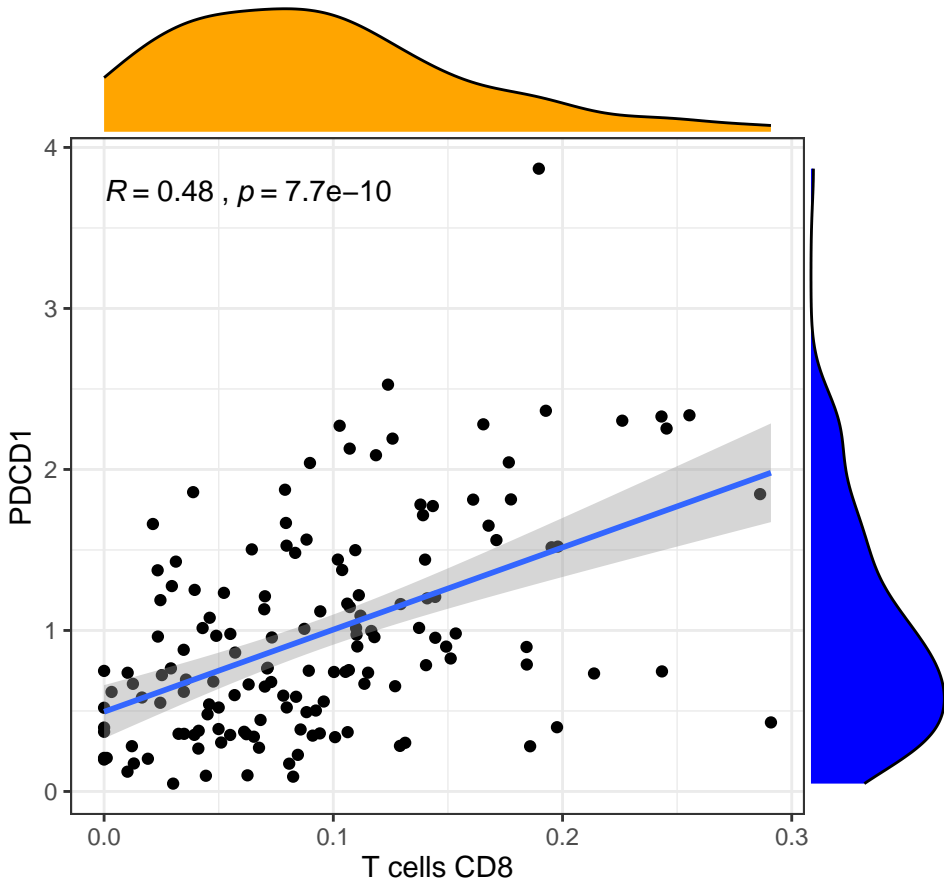

Cancer: KICH

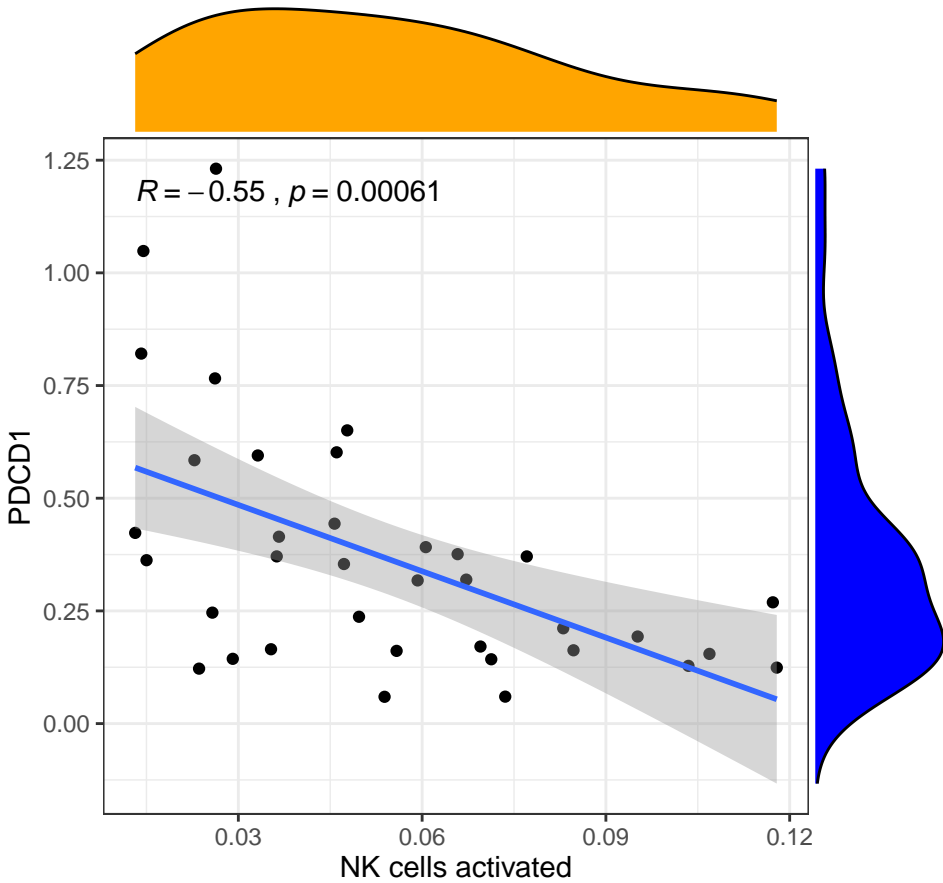

Cancer: KIRC

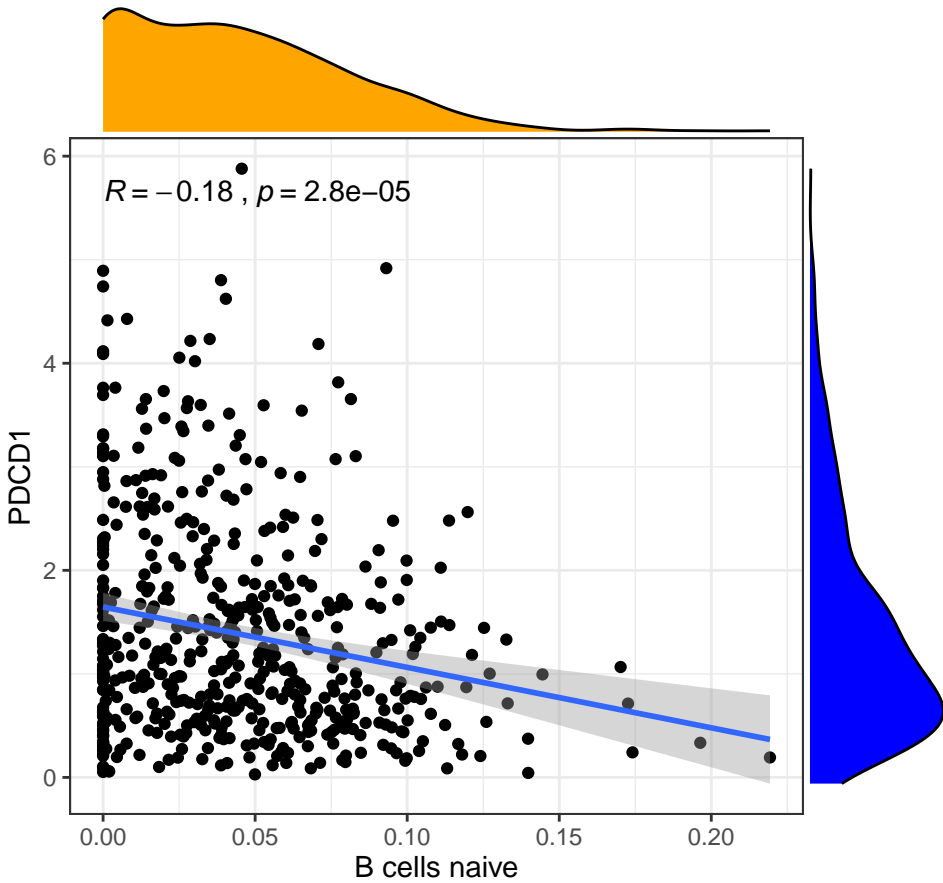

Cancer: KIRC

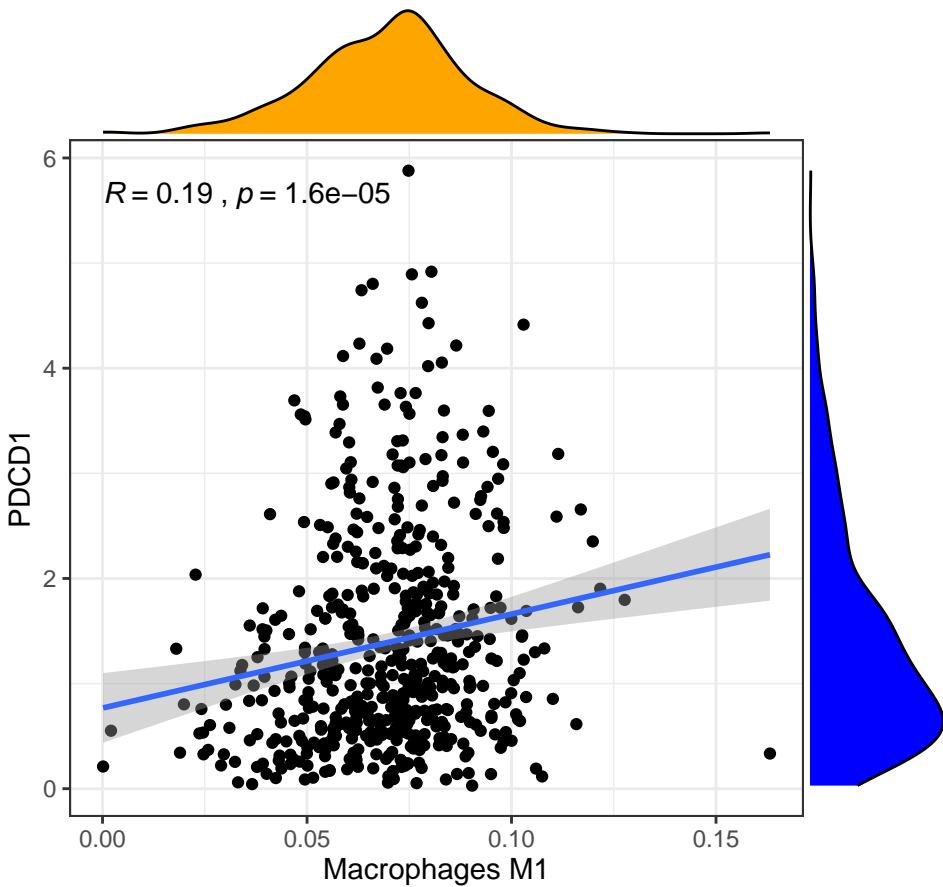

Cancer: KIRC

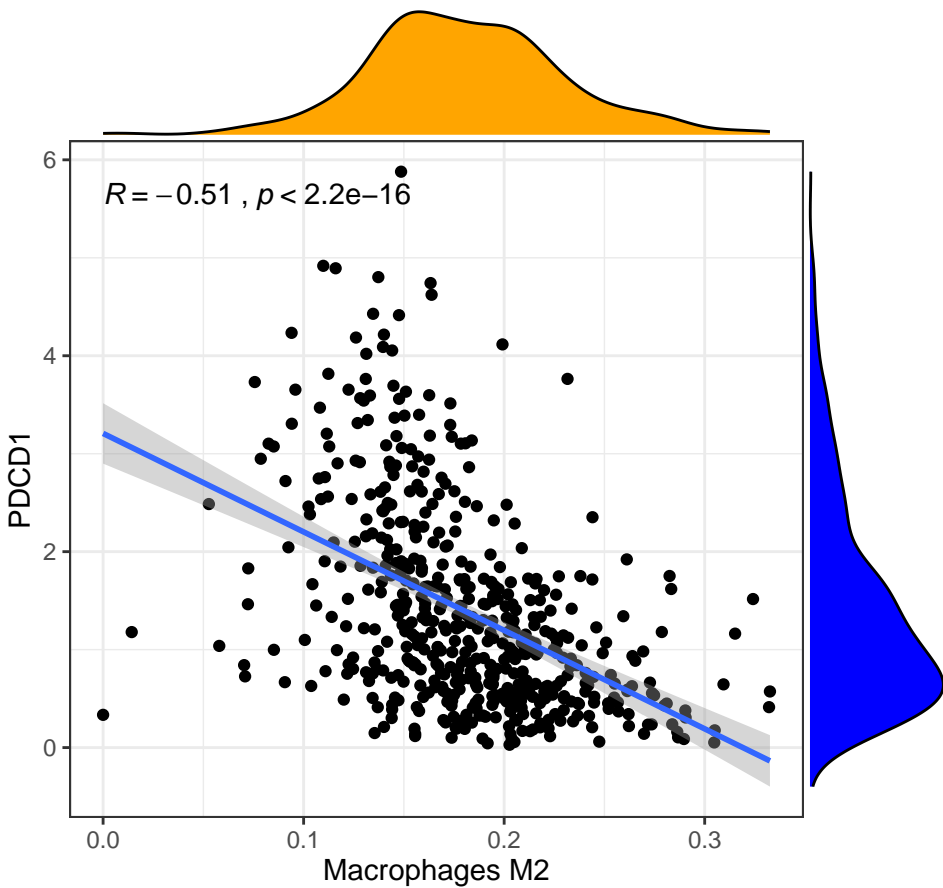

Cancer: KIRC

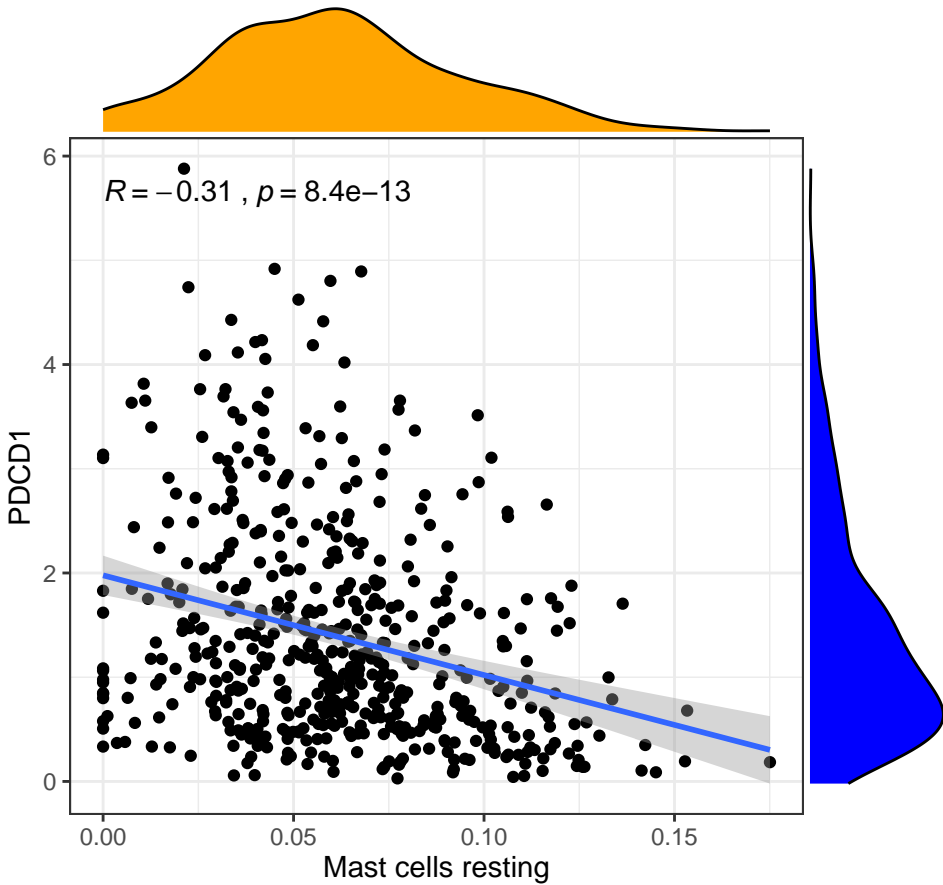

Cancer: KIRC

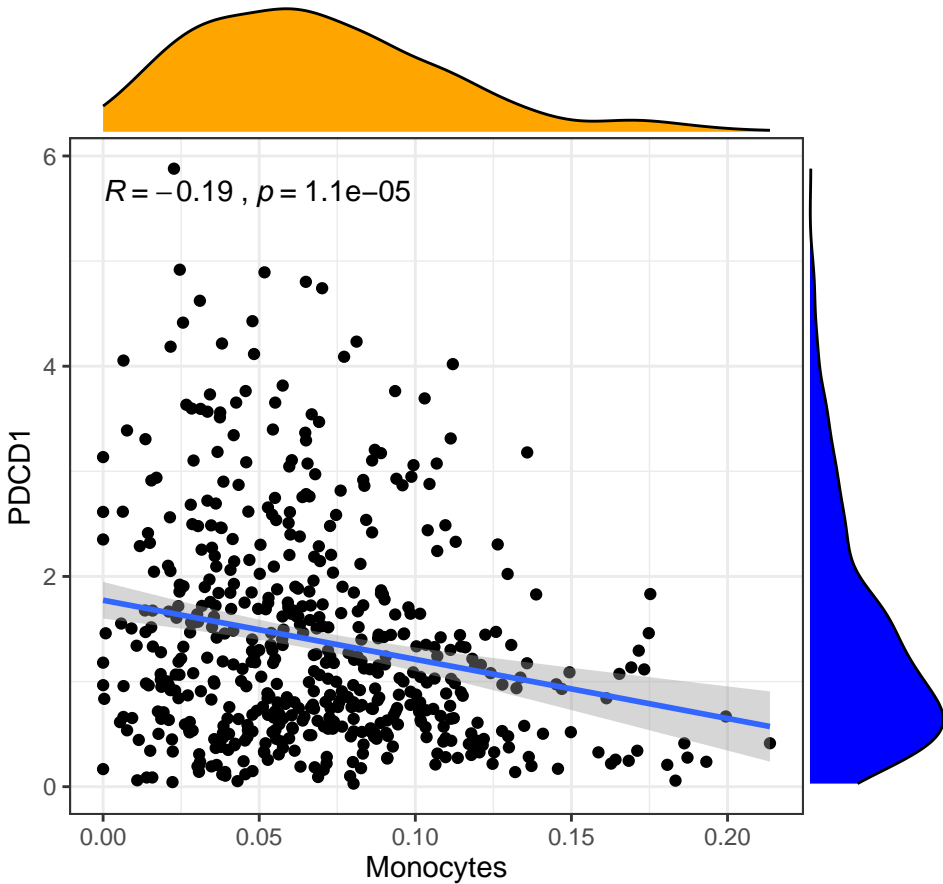

Cancer: KIRC

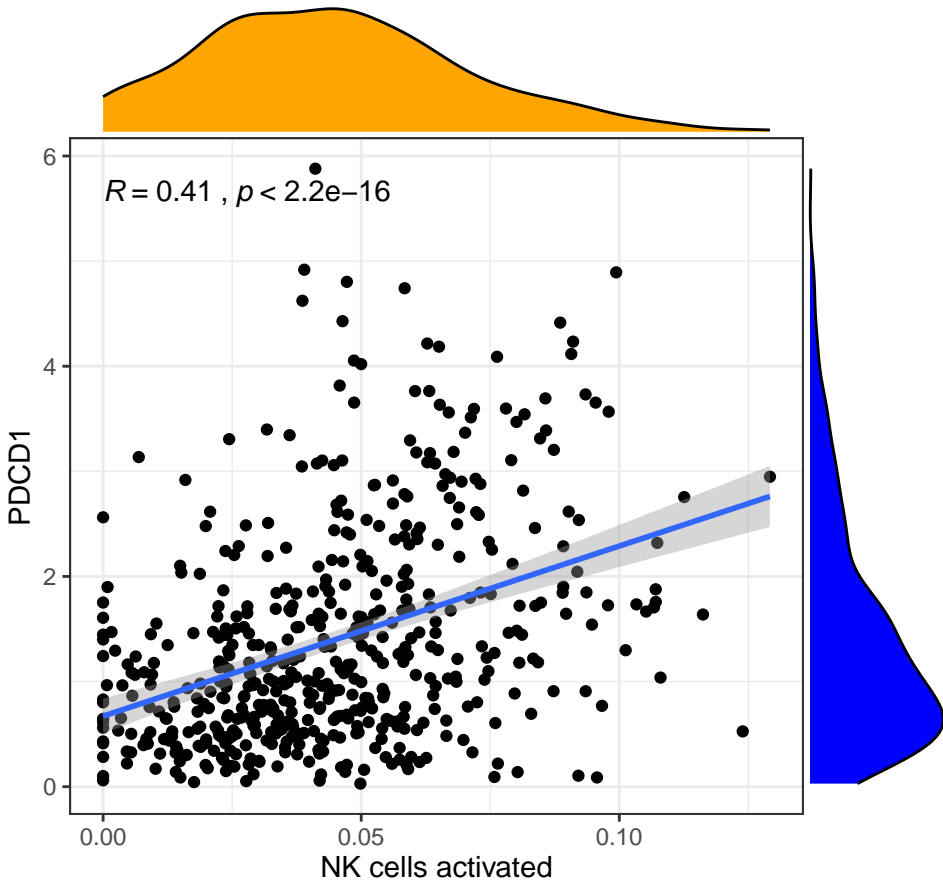

Cancer: KIRC

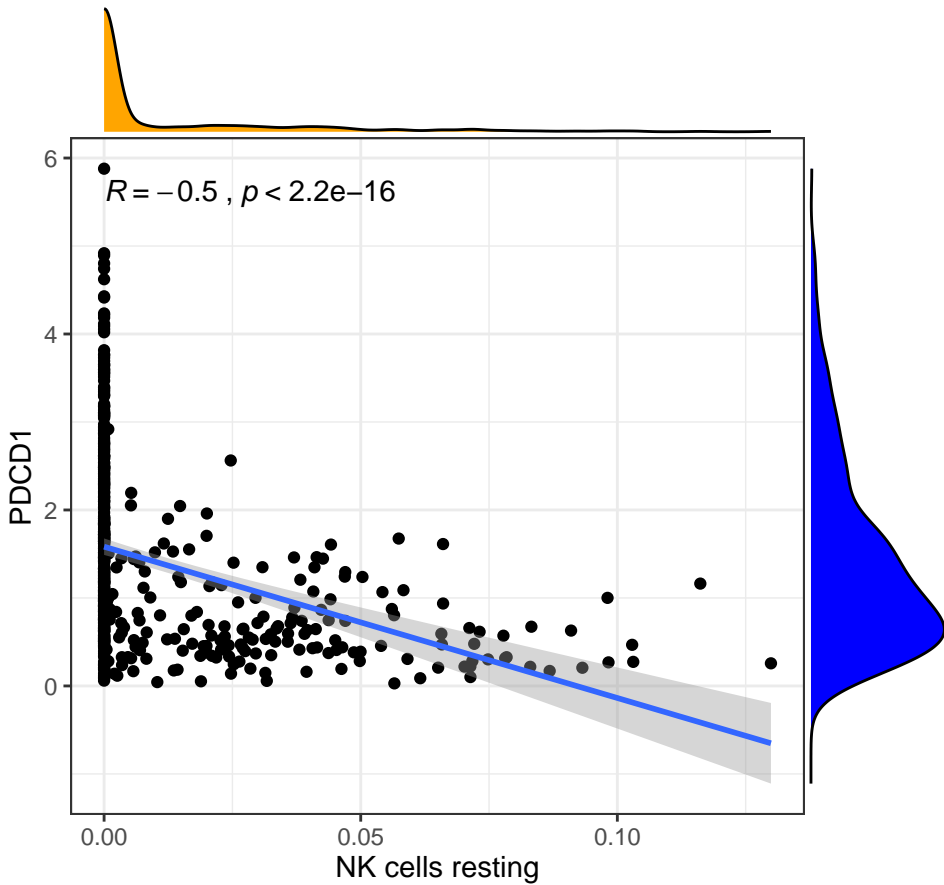

Cancer: KIRC

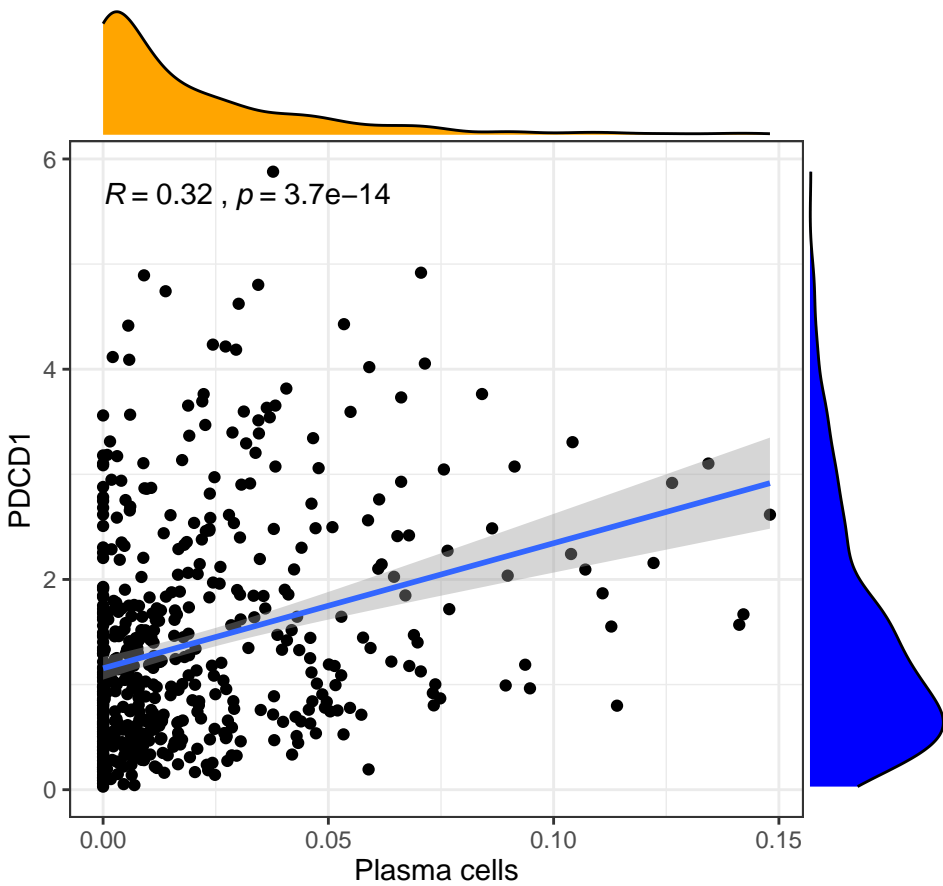

Cancer: KIRC

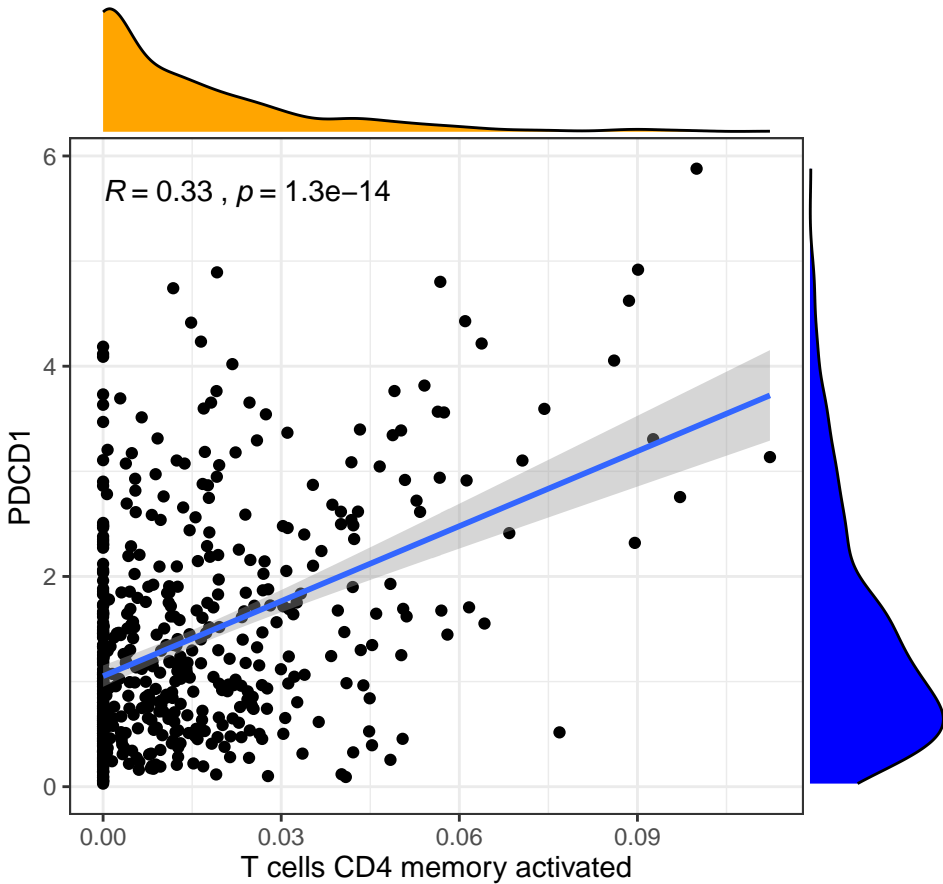

Cancer: KIRC

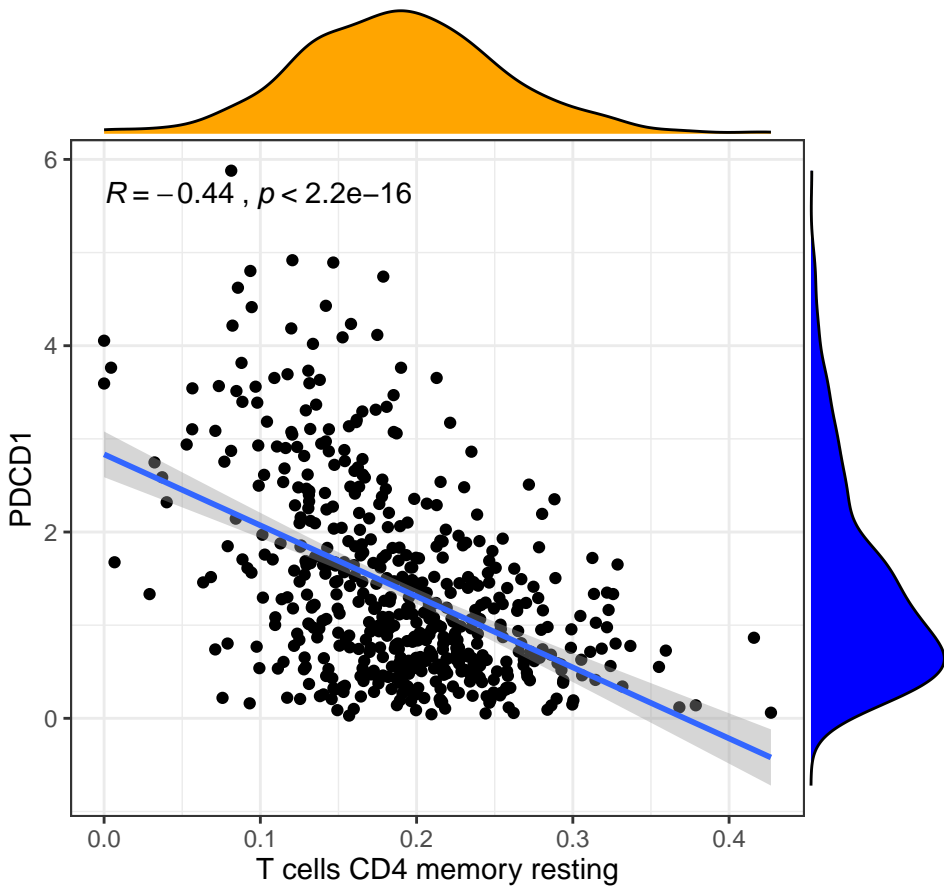

Cancer: KIRC

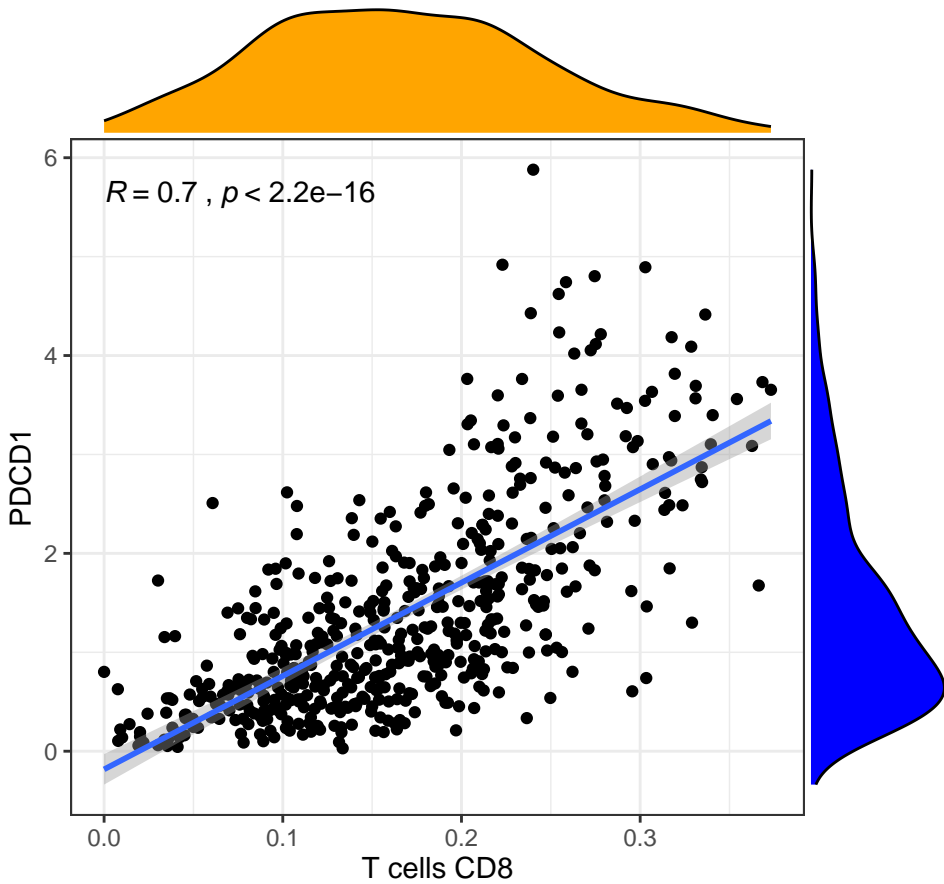

Cancer: KIRC

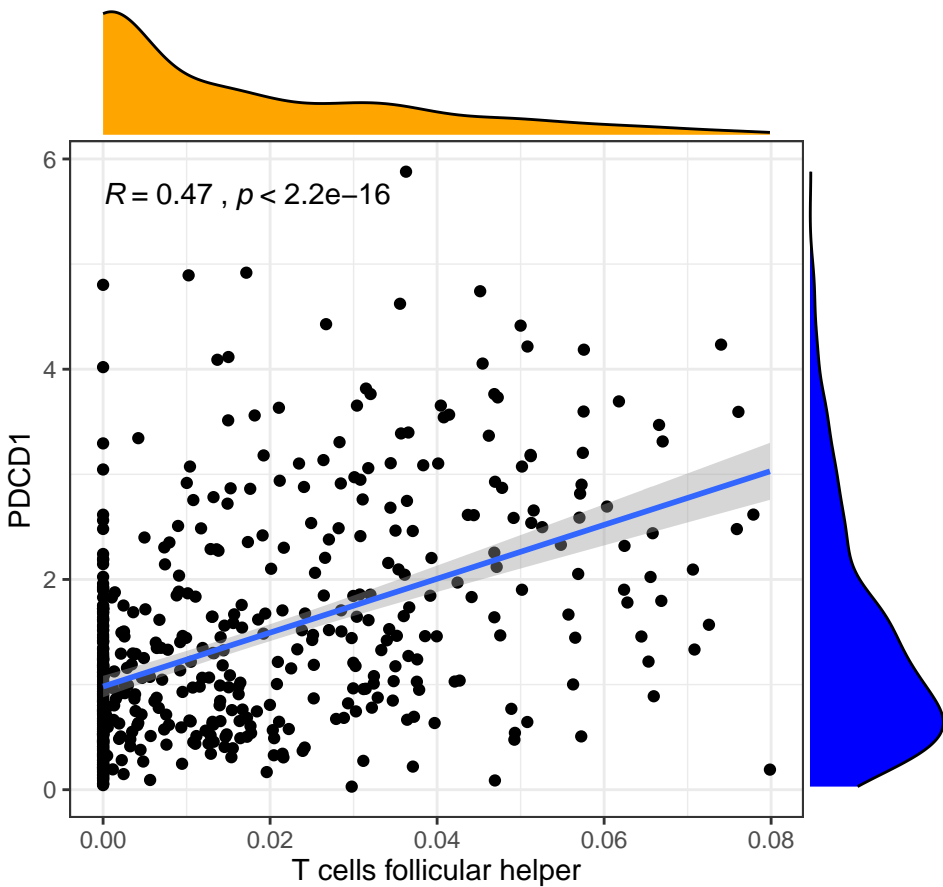

Cancer: KIRC

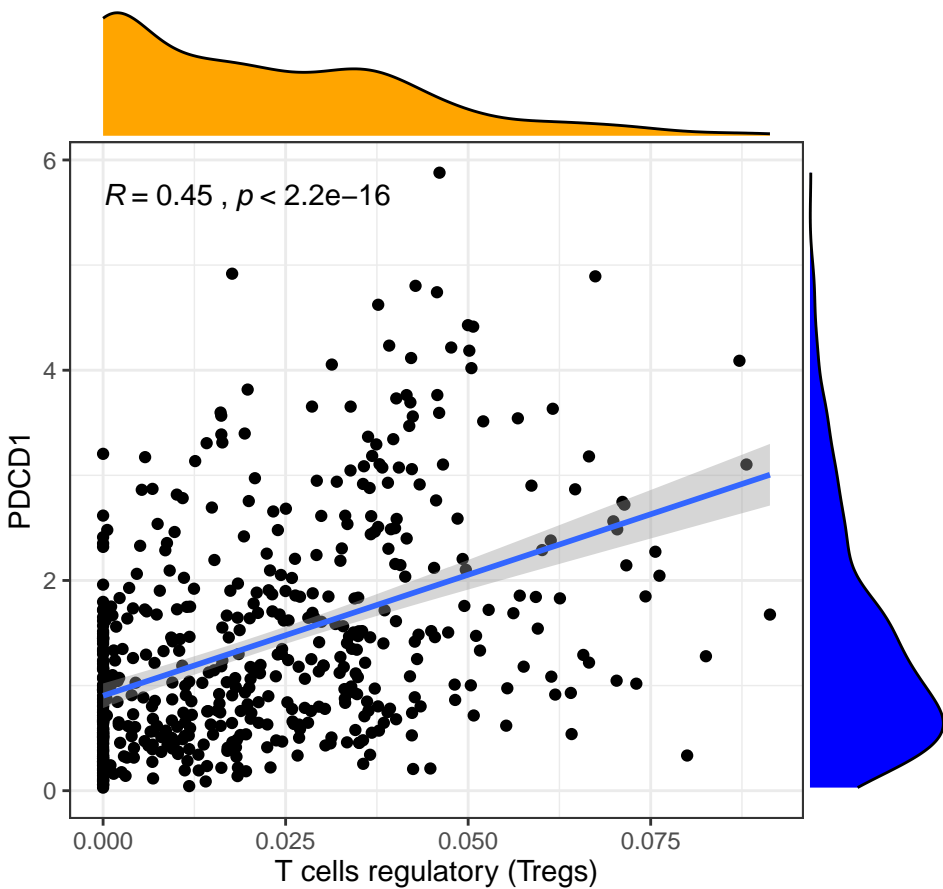

Cancer: LIHC

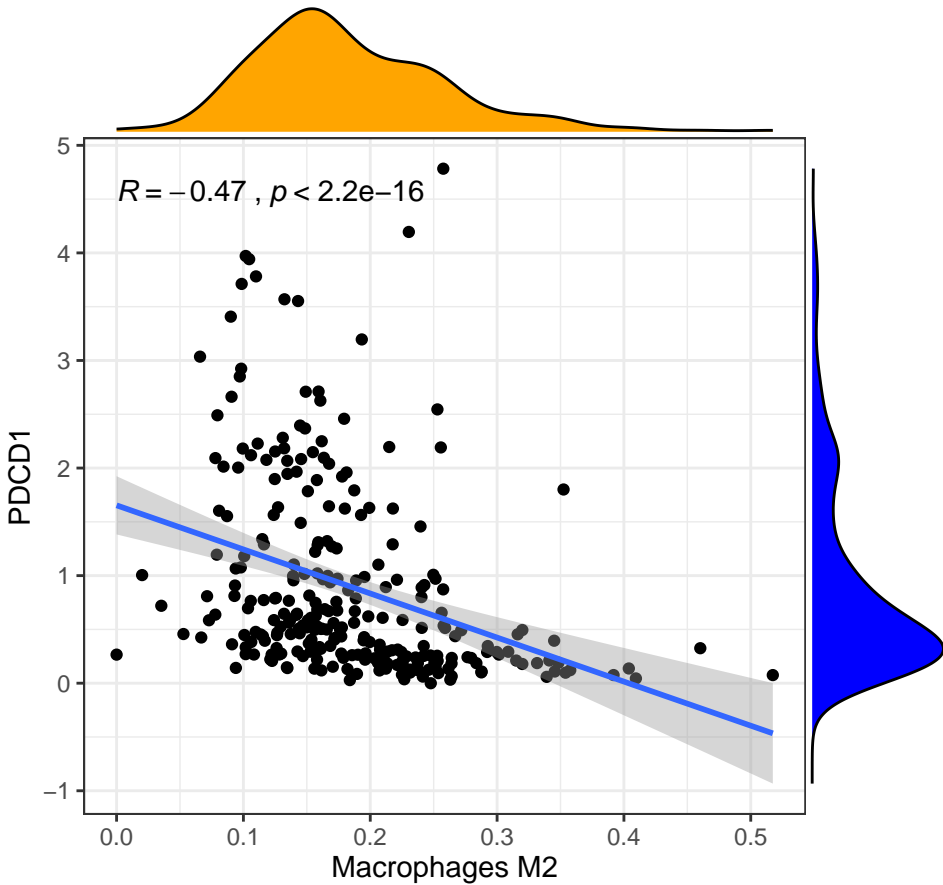

Cancer: LIHC

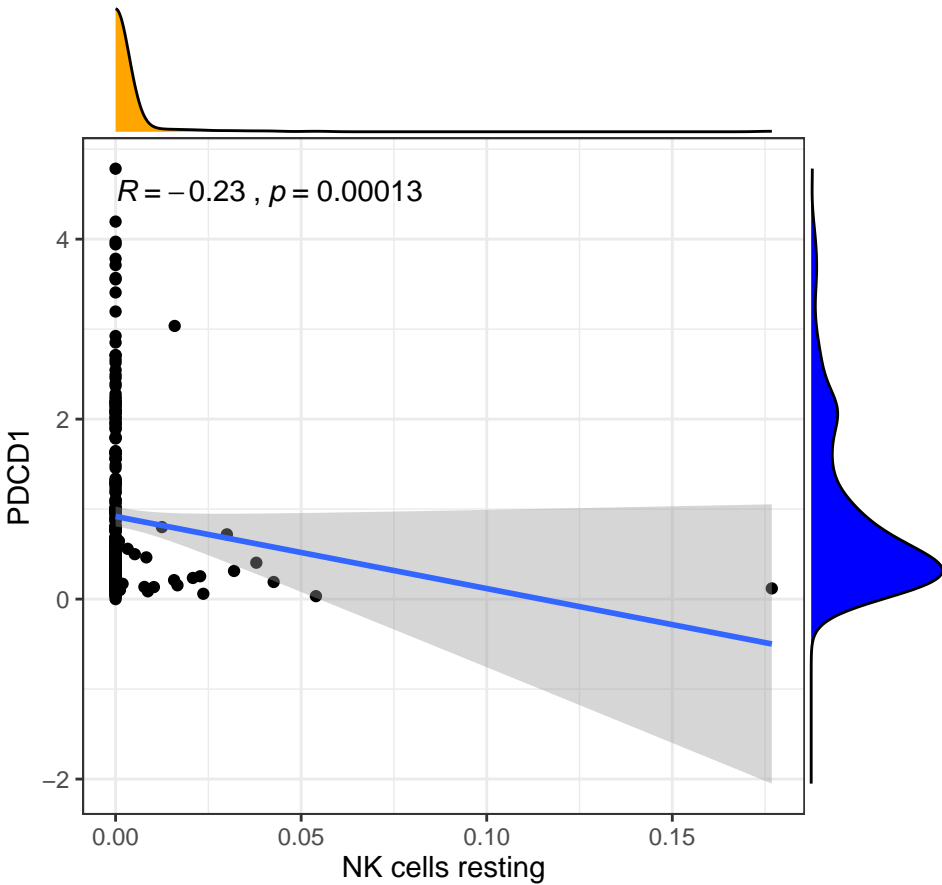

Cancer: LIHC

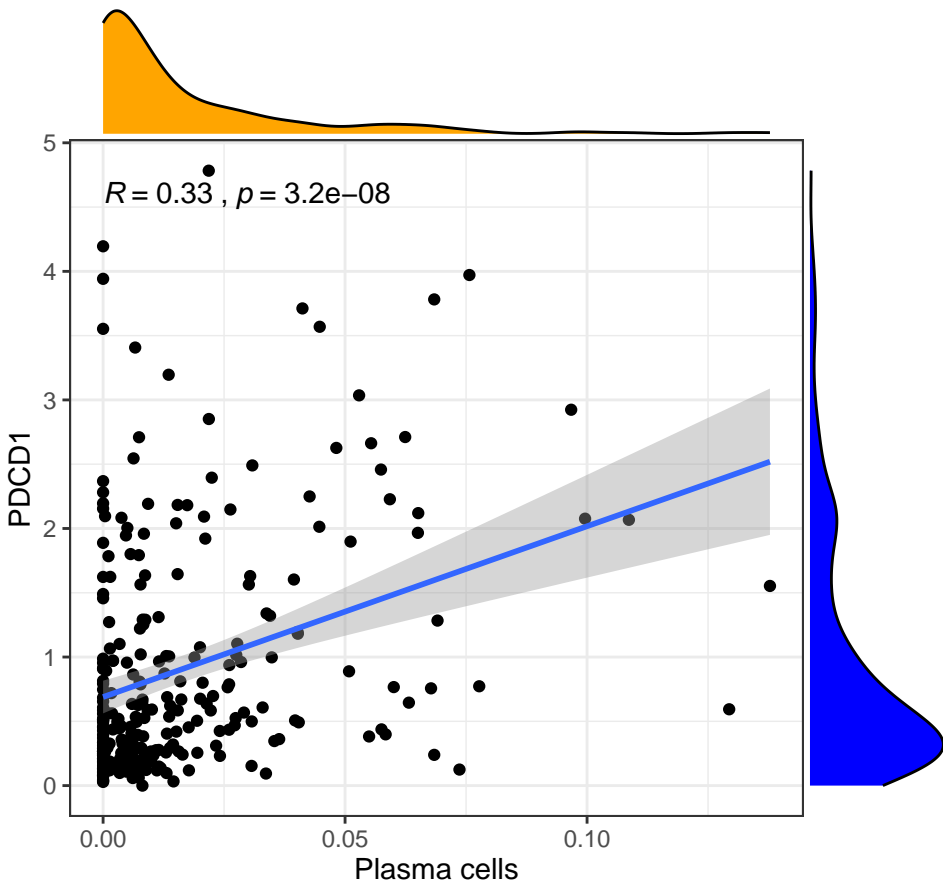

Cancer: LIHC

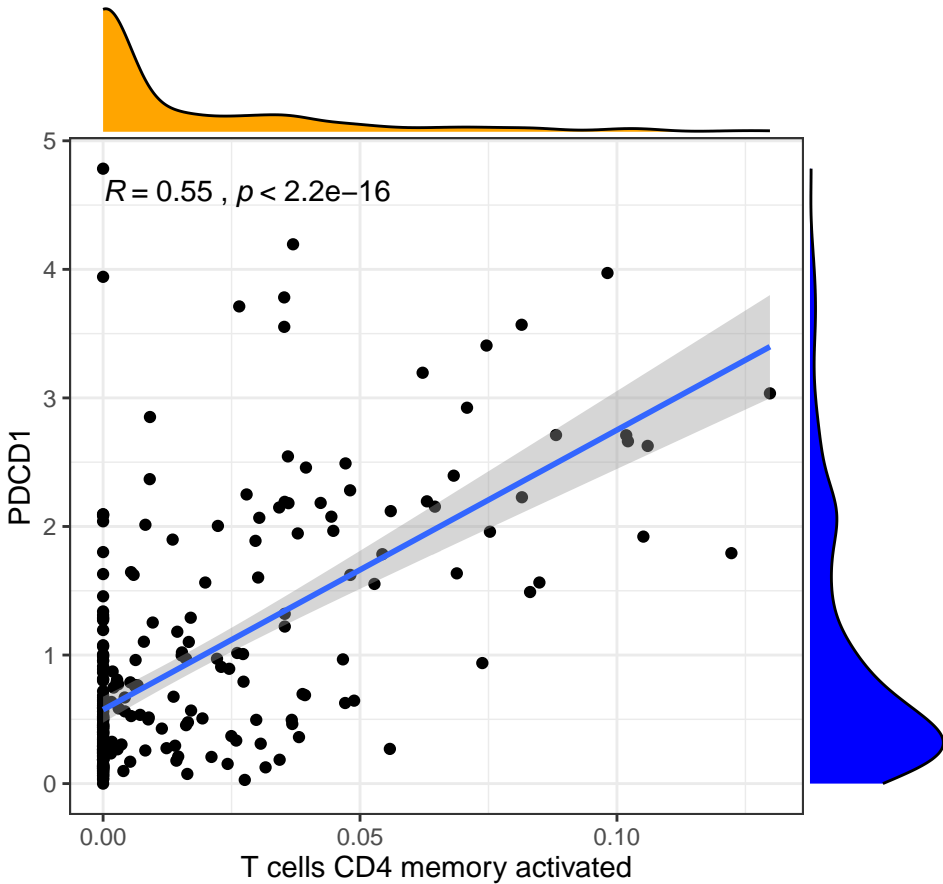

Cancer: LIHC

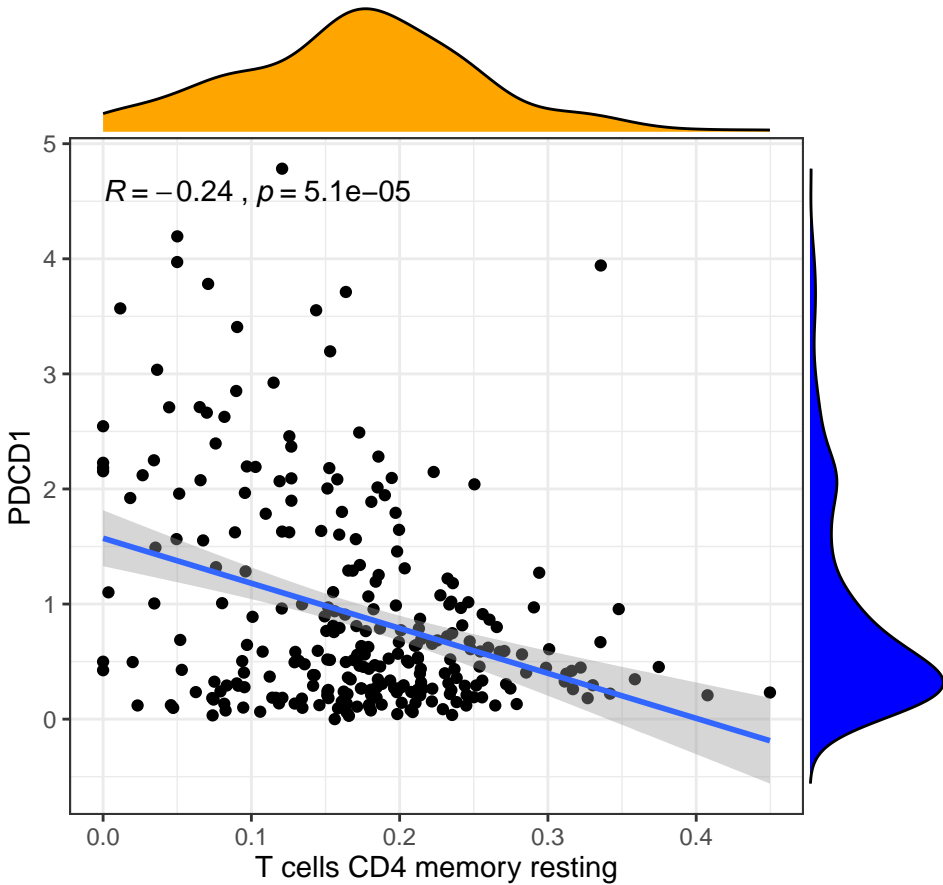

Cancer: LIHC

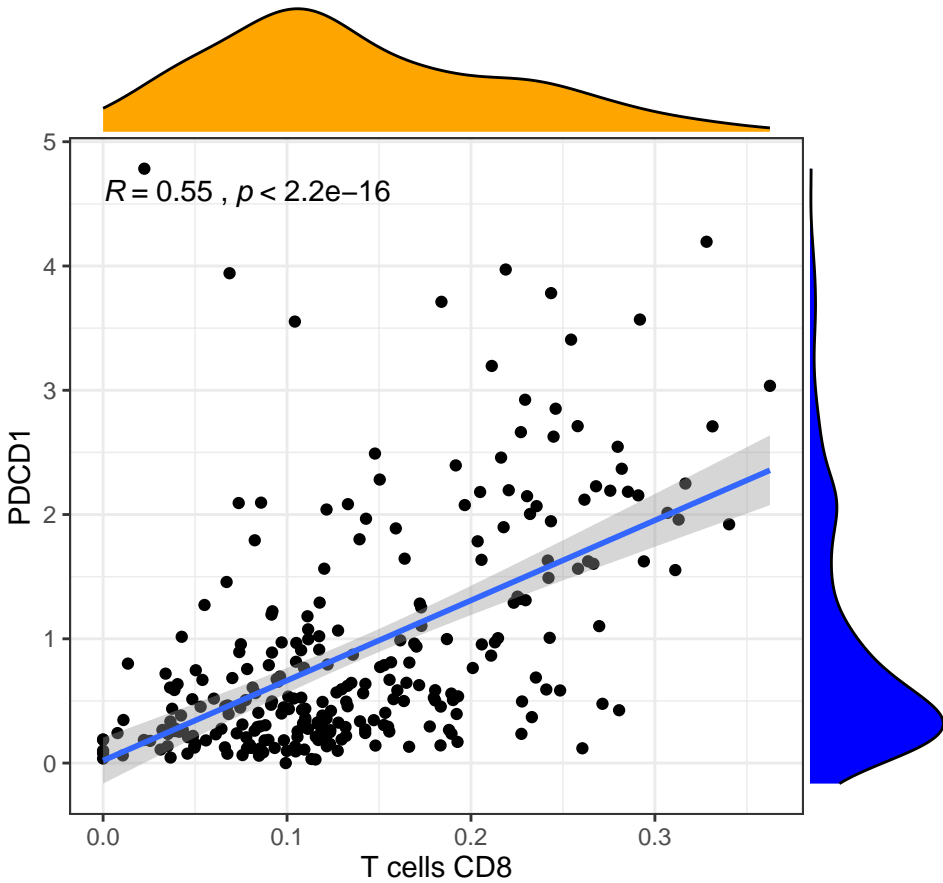

Cancer: LIHC

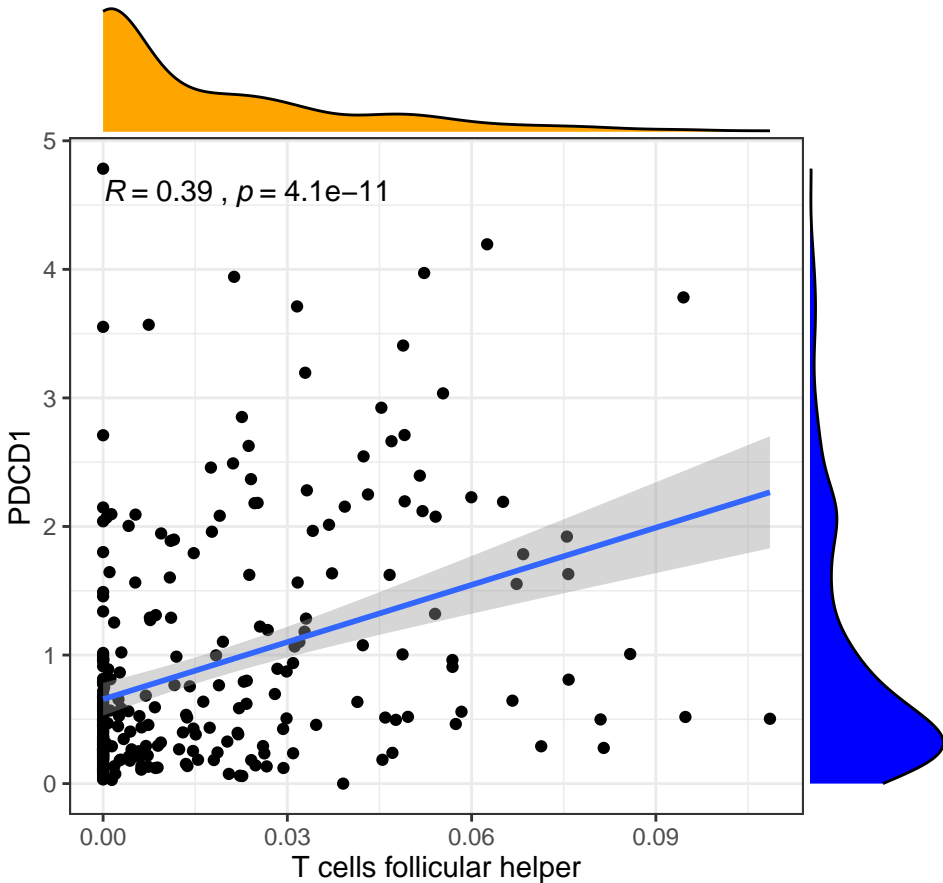

Cancer: LUAD

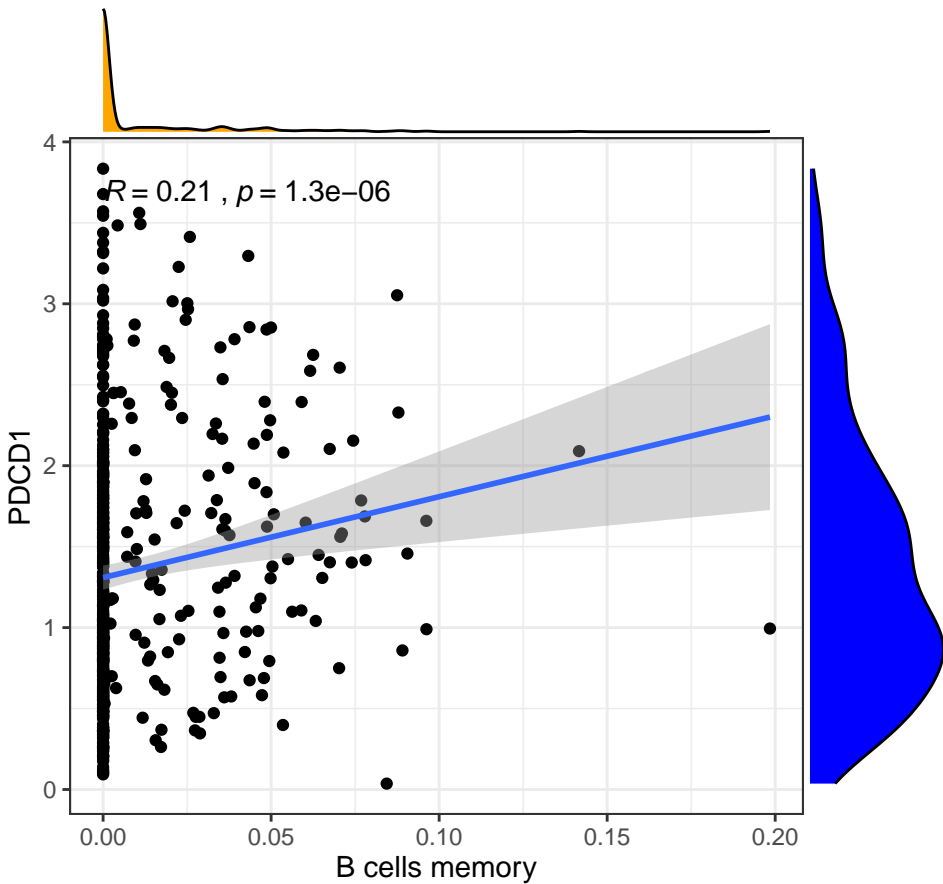

Cancer: LUAD

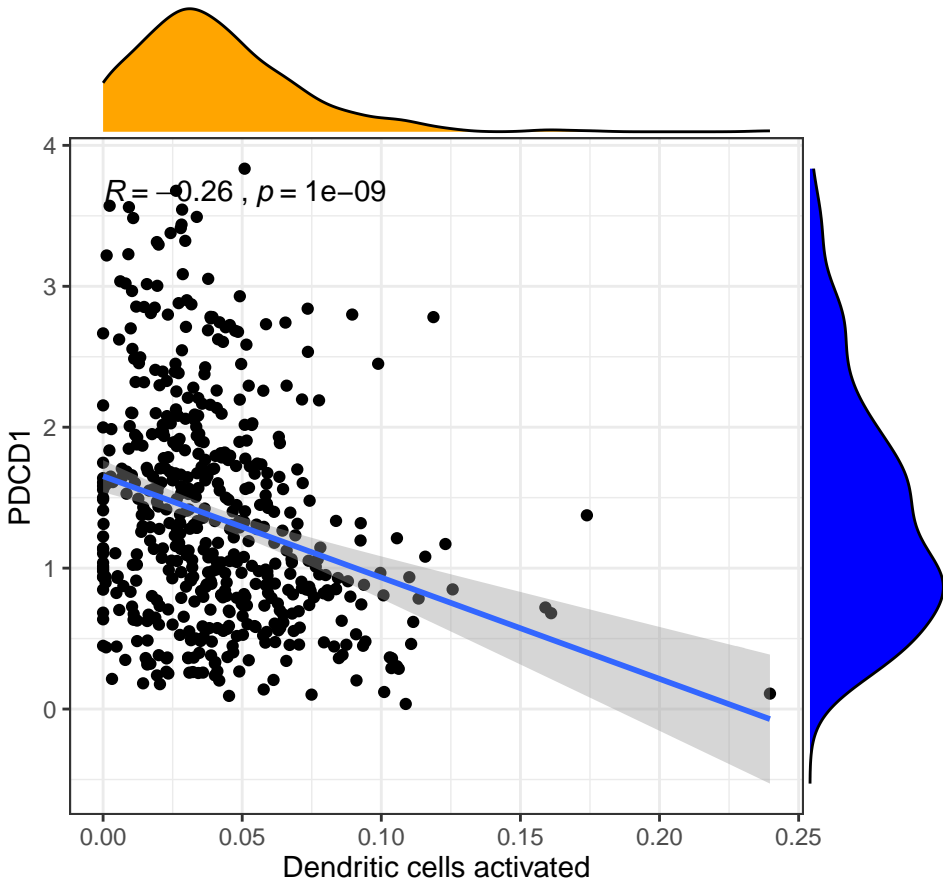

Cancer: LUAD

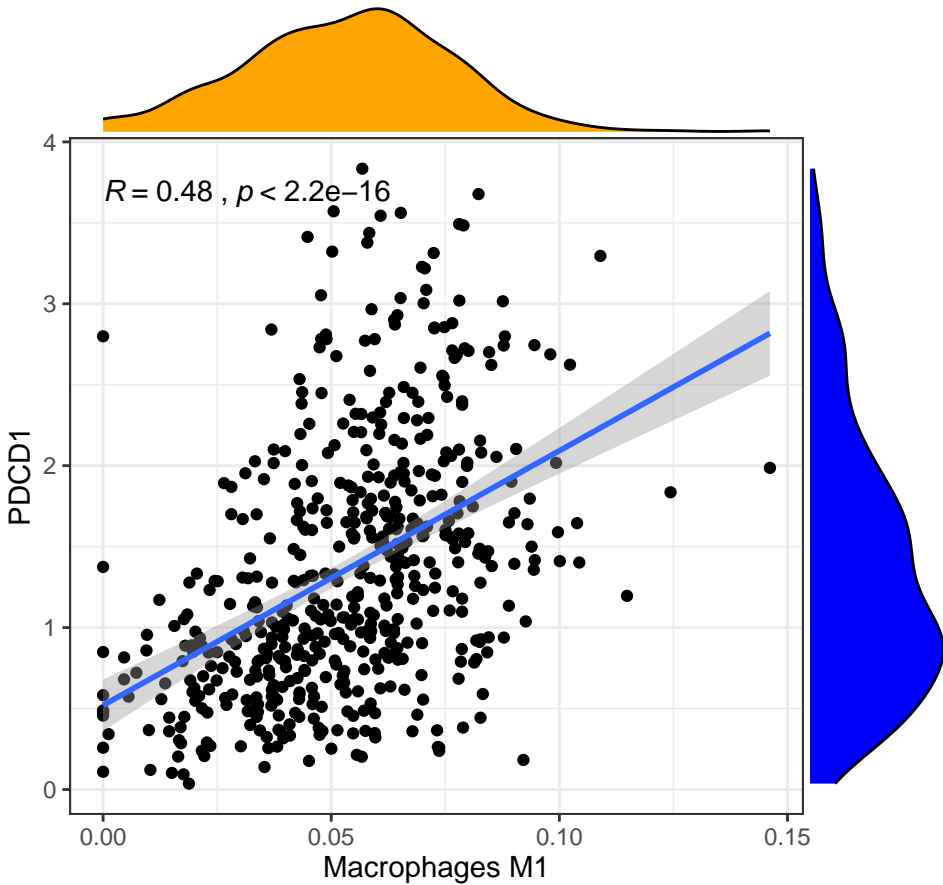

Cancer: LUAD

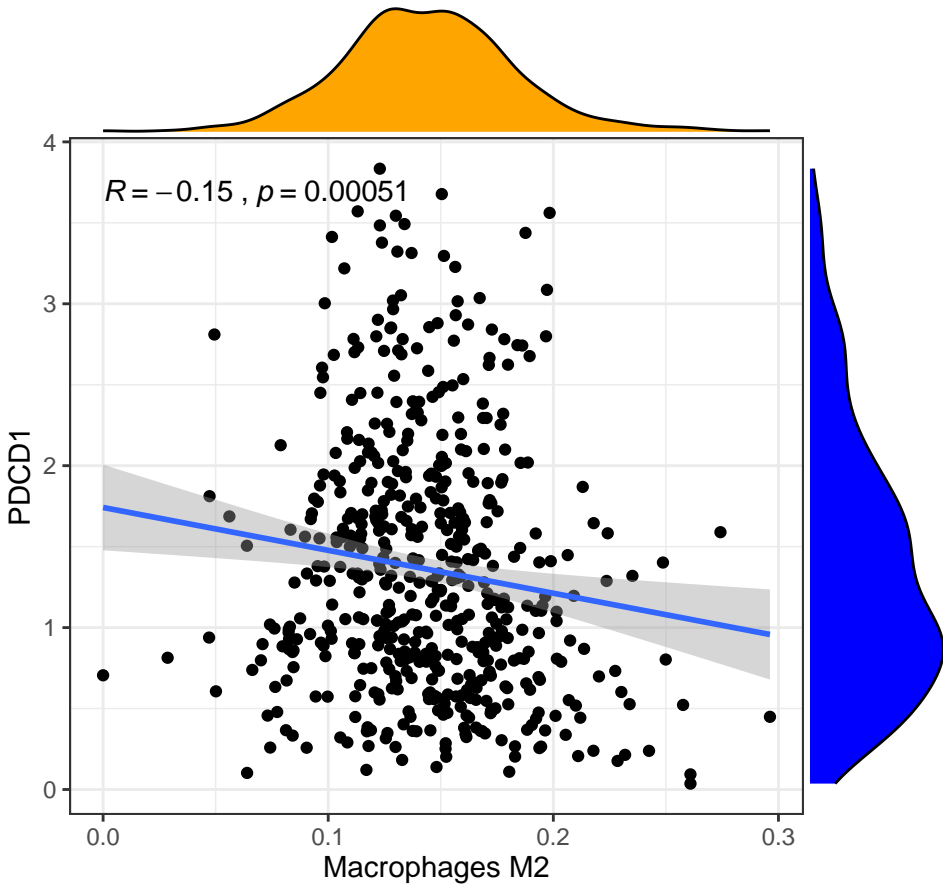

Cancer: LUAD

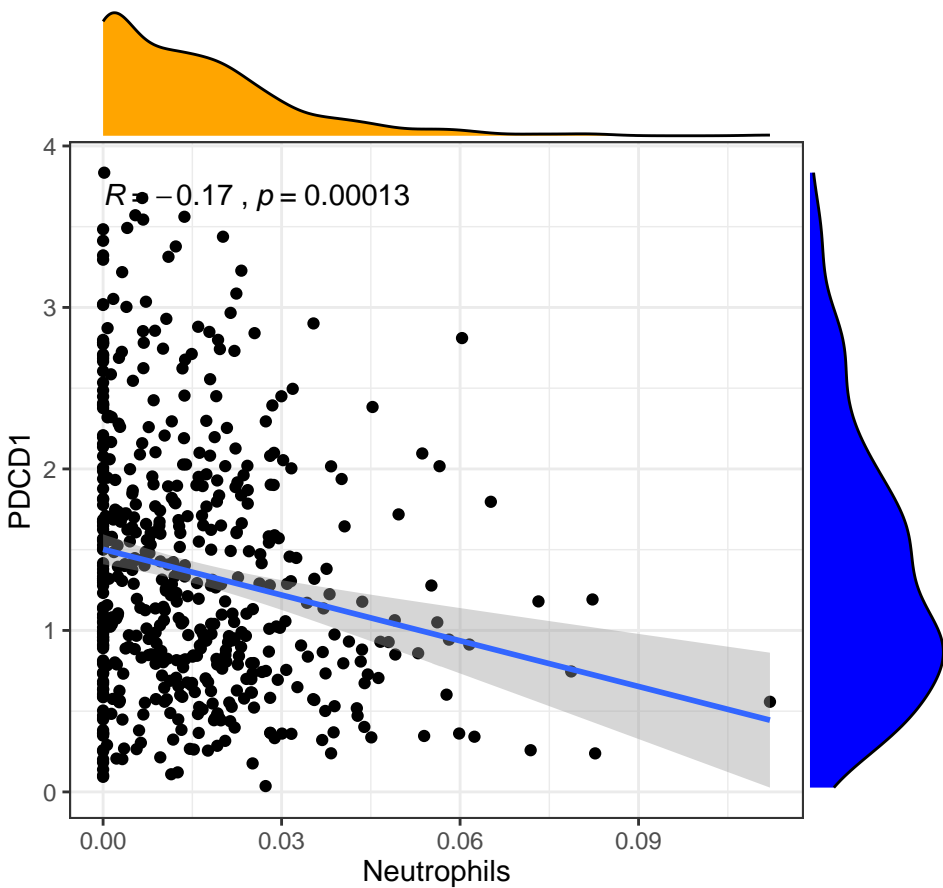

Cancer: LUAD

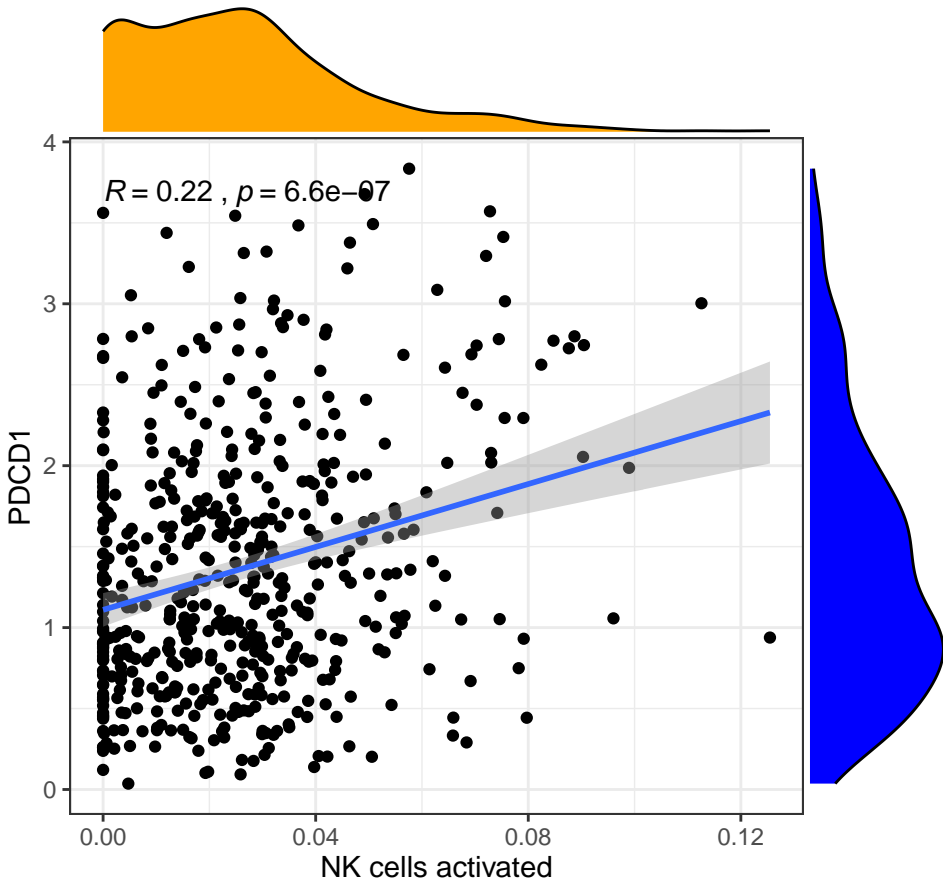

Cancer: LUAD

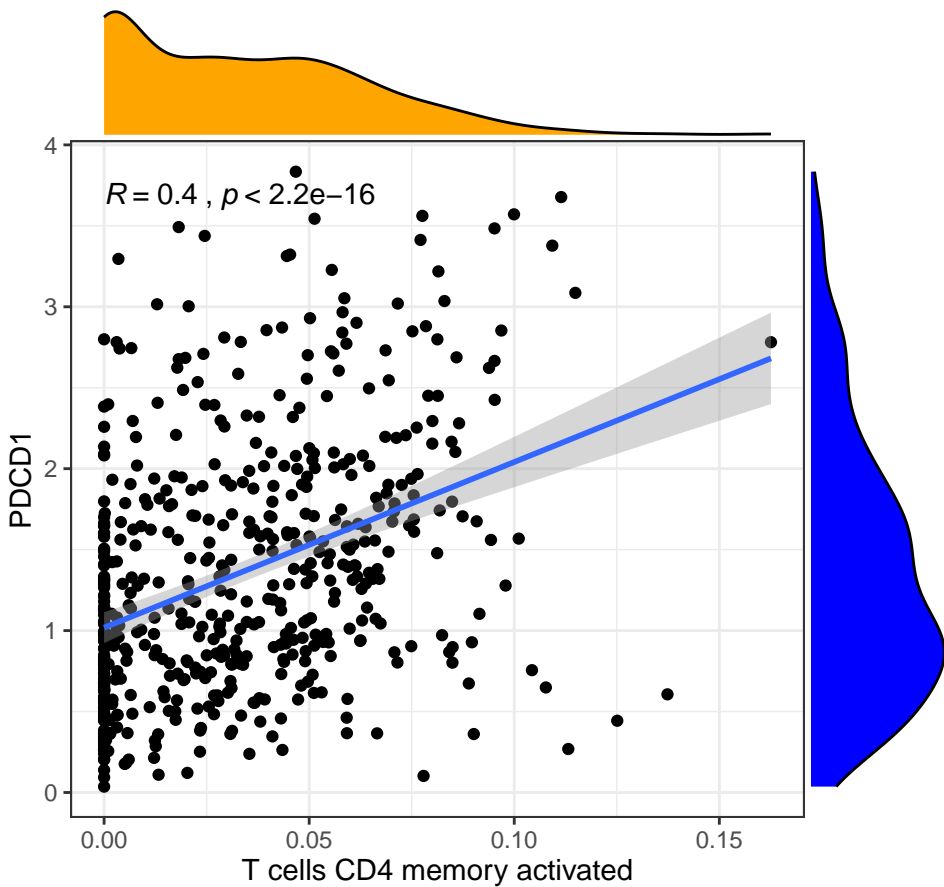

Cancer: LUAD

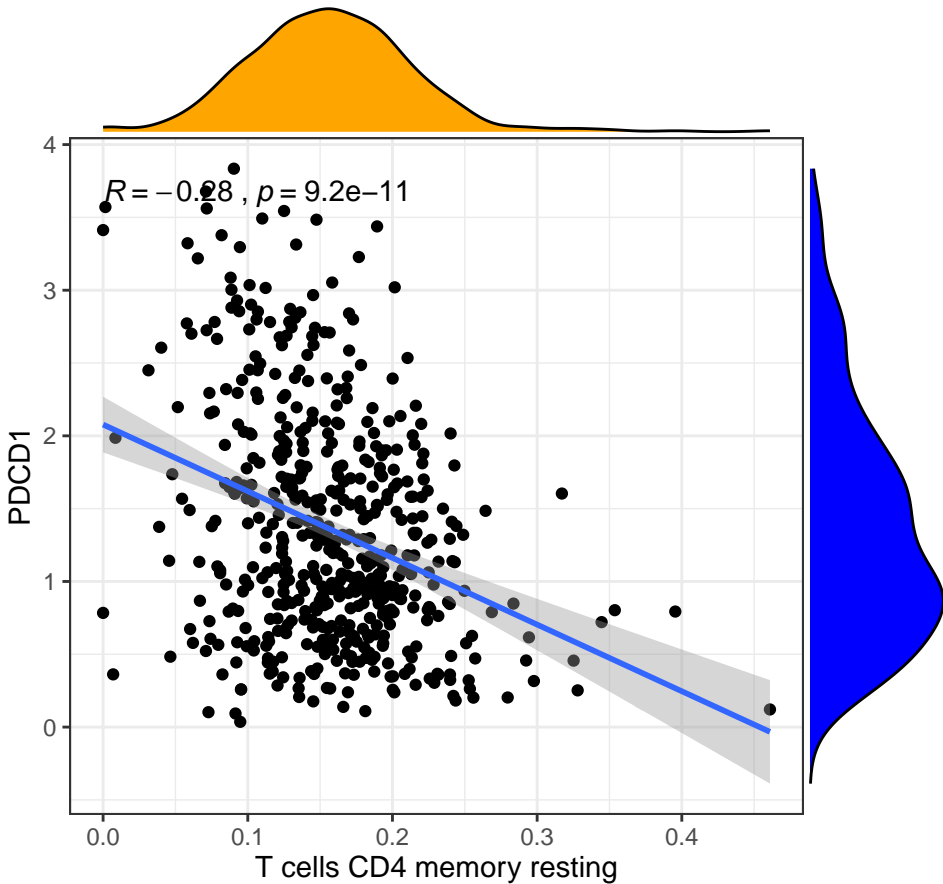

Cancer: LUAD

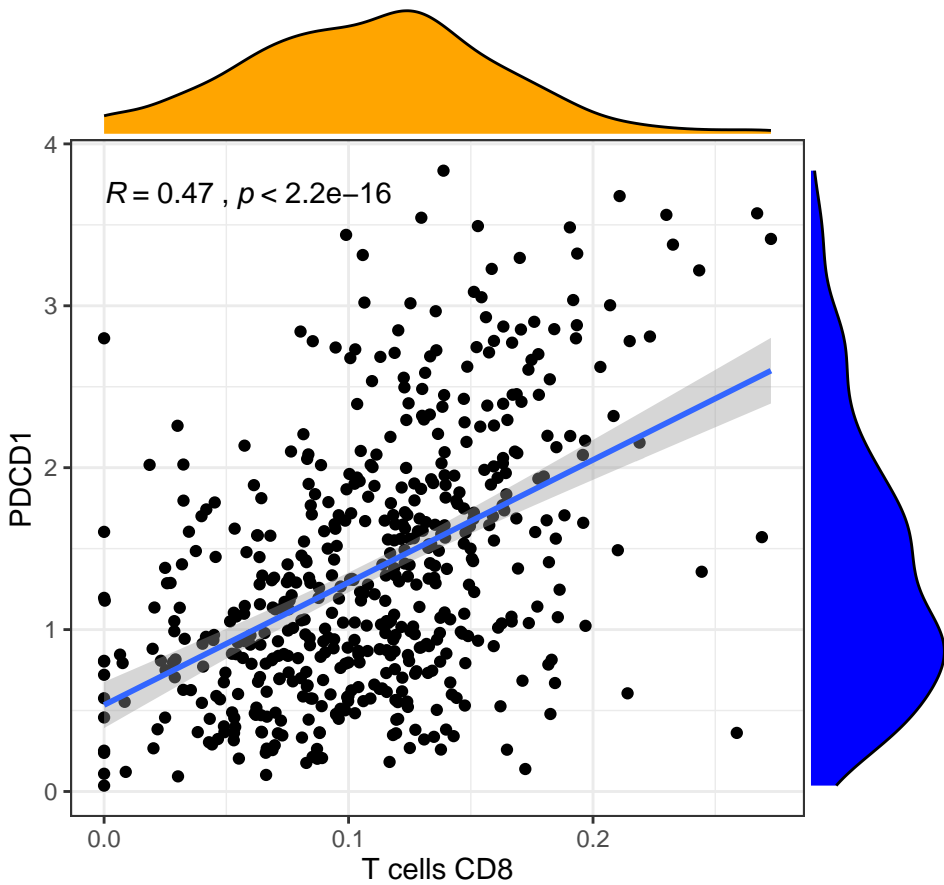

Cancer: LUSC

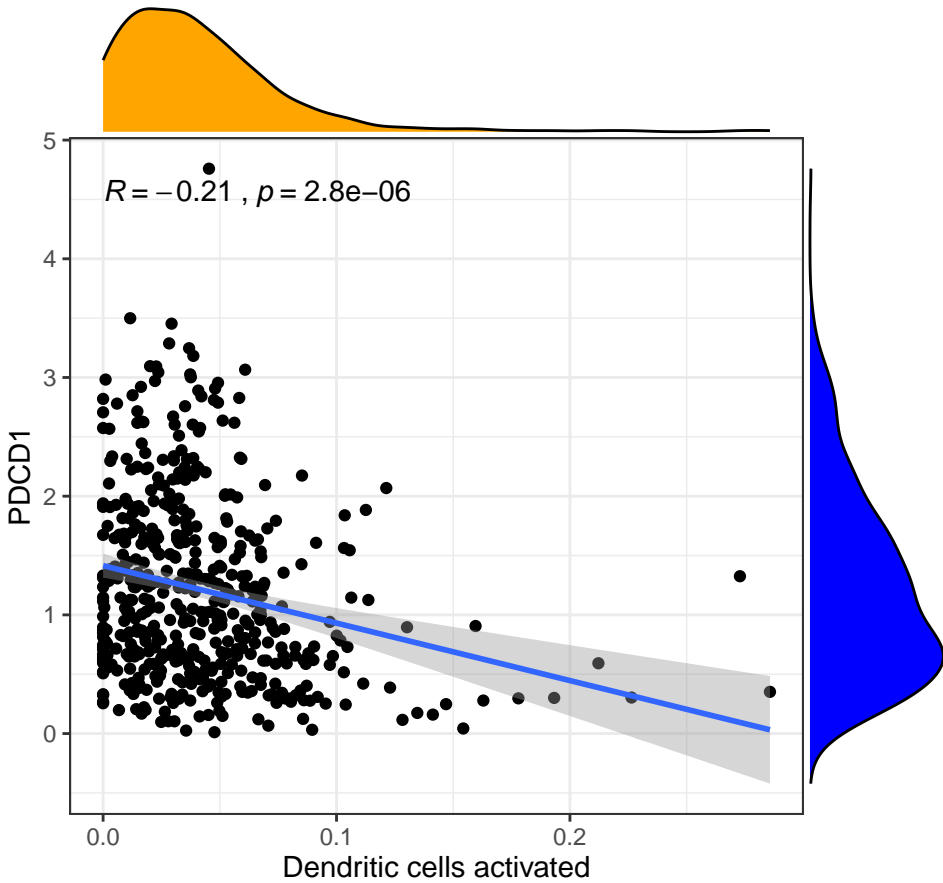

Cancer: LUSC

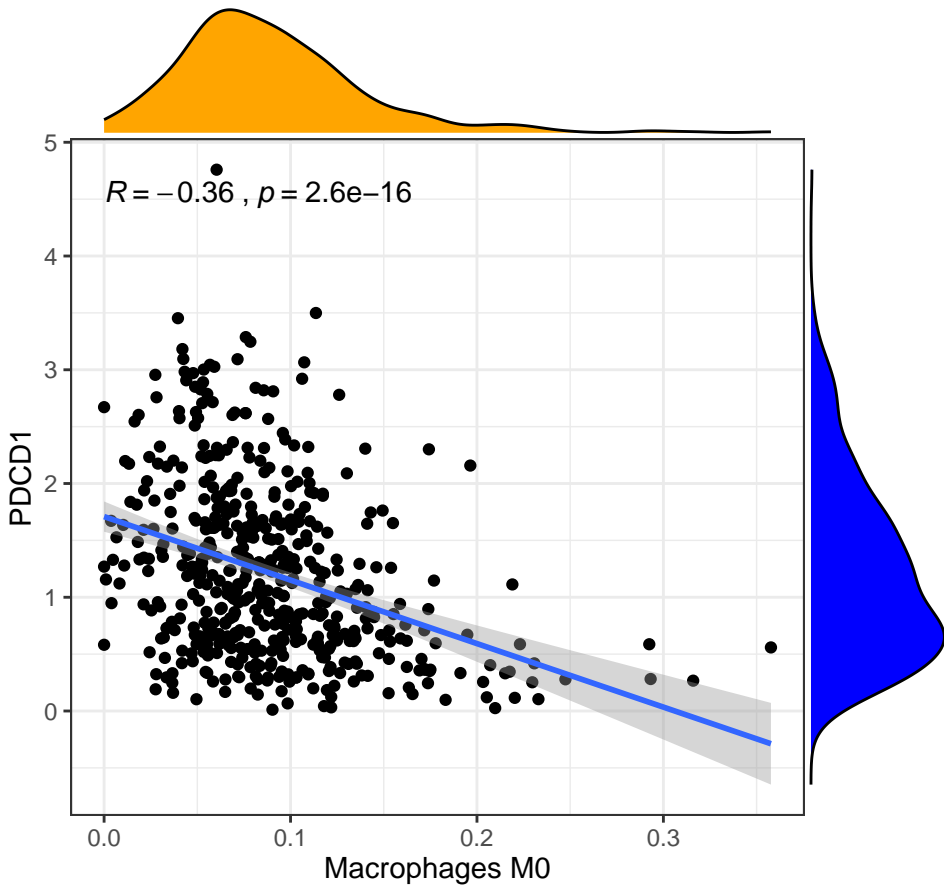

Cancer: LUSC

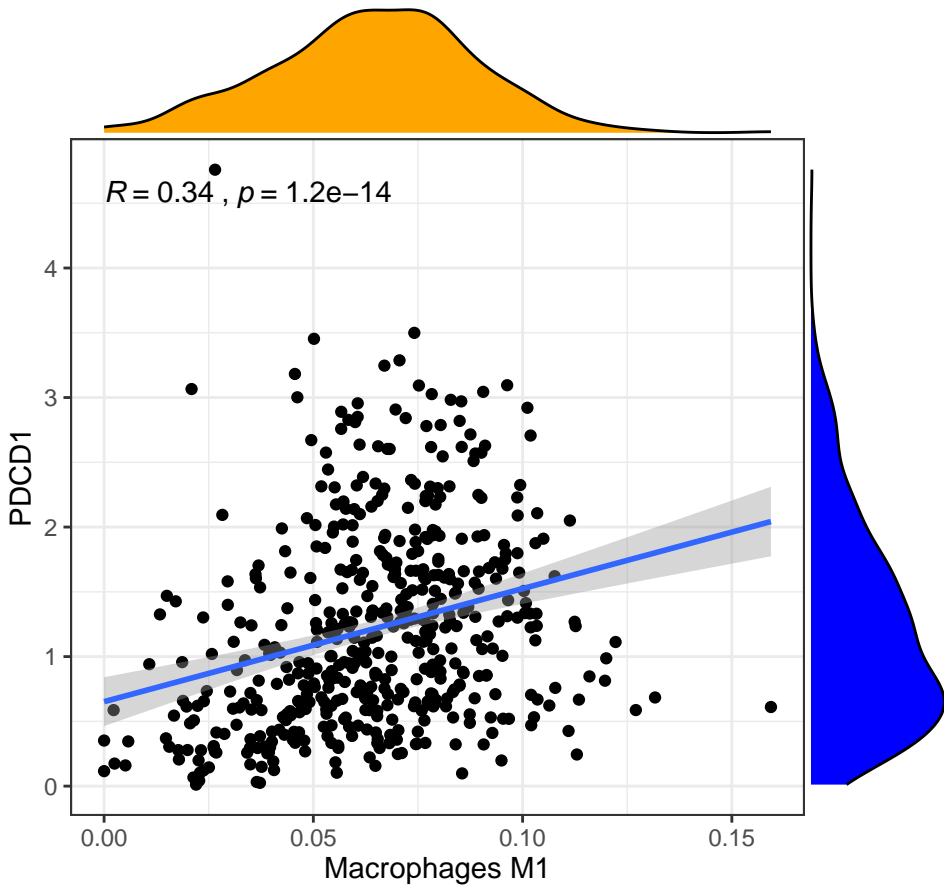

Cancer: LUSC

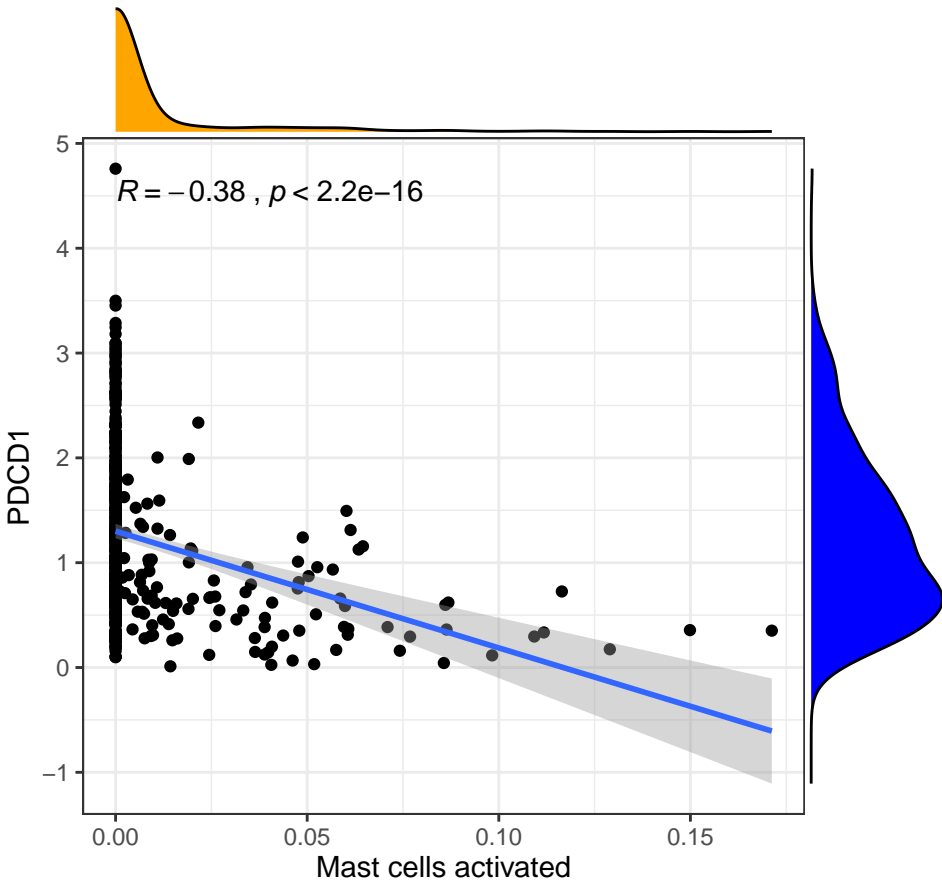

Cancer: LUSC

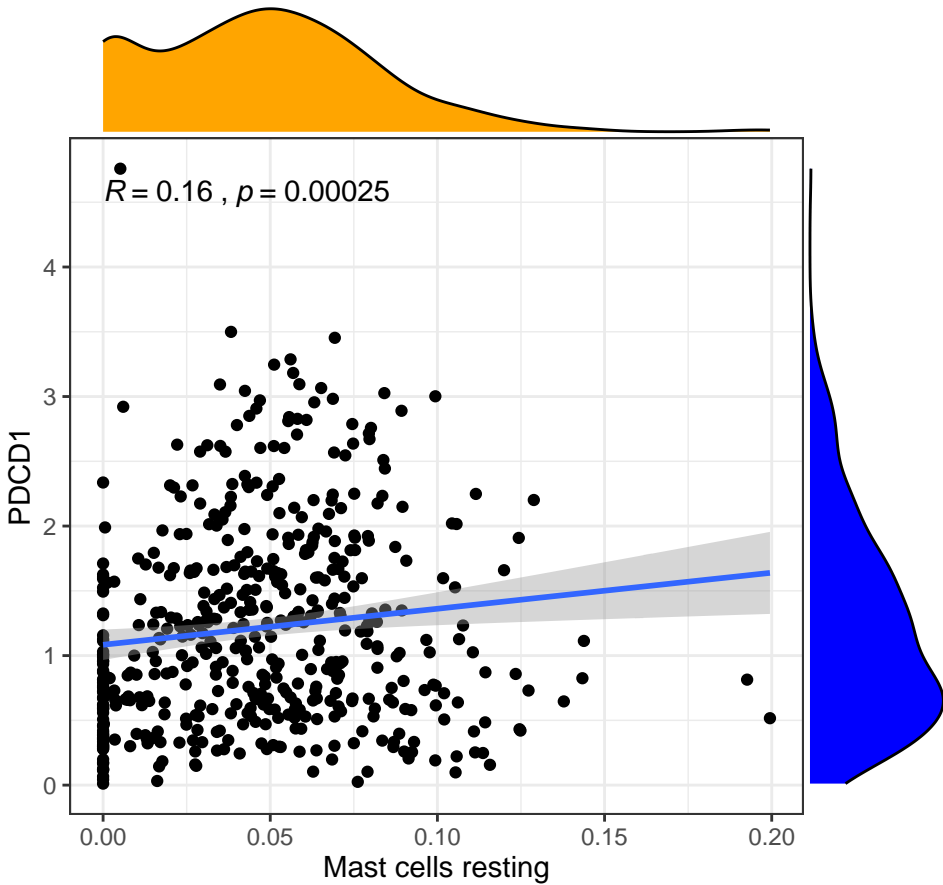

Cancer: LUSC

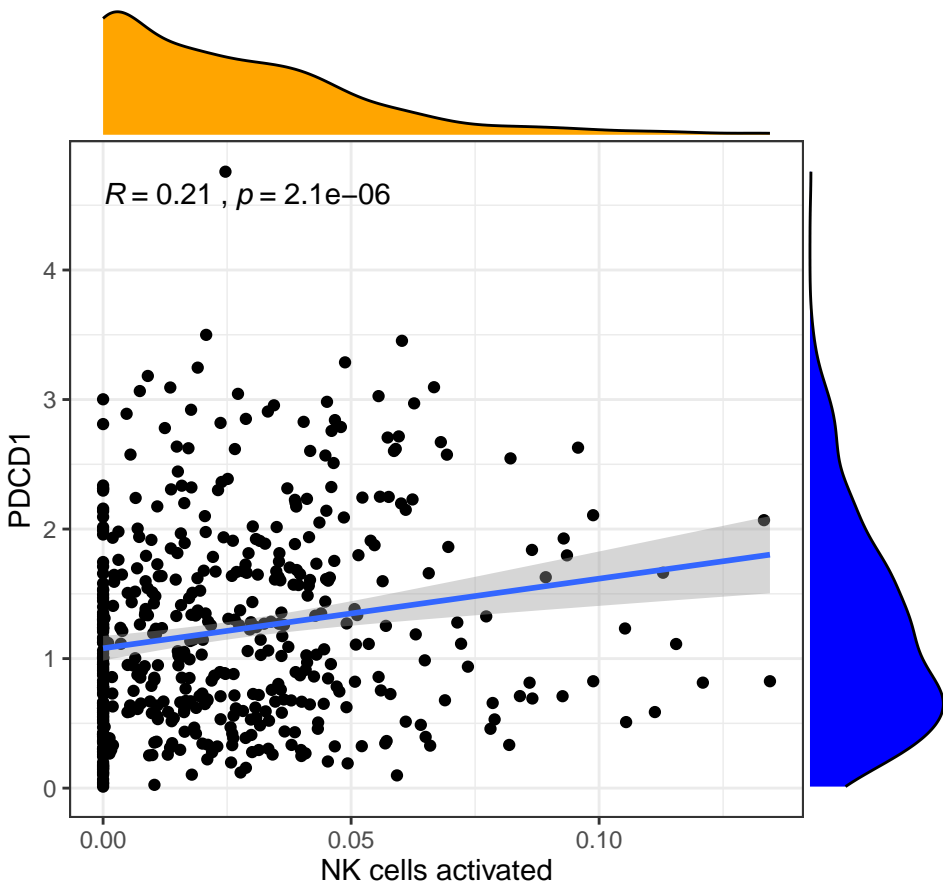

Cancer: LUSC

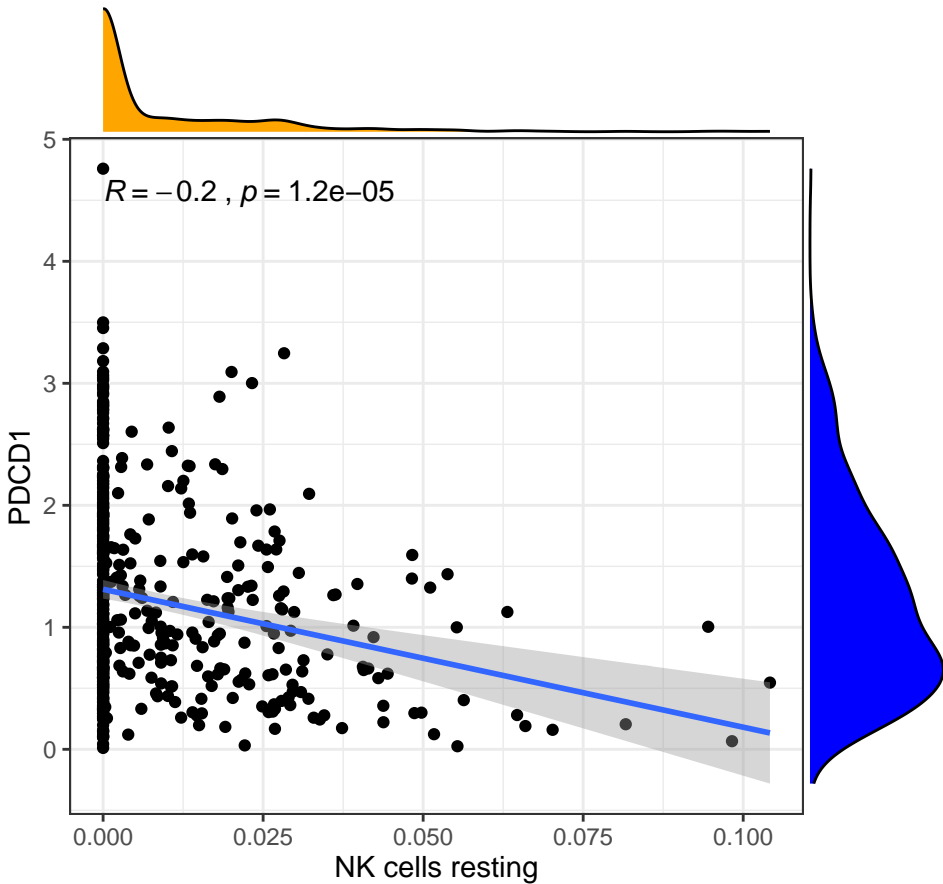

Cancer: LUSC

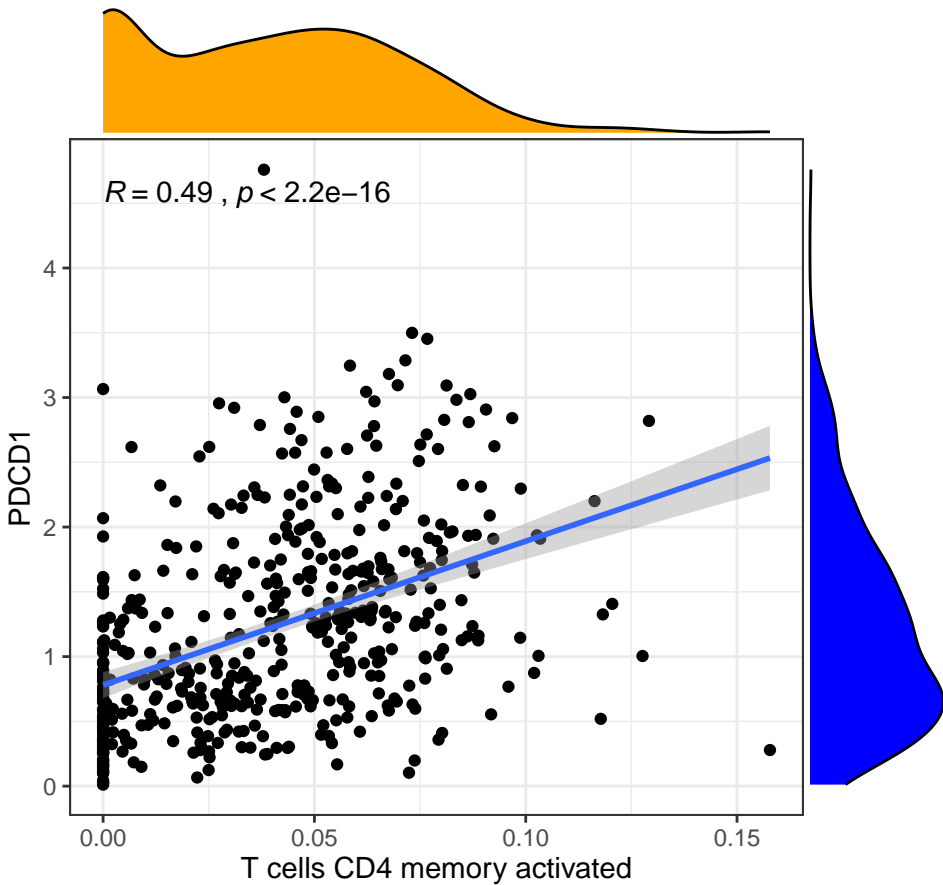

Cancer: LUSC

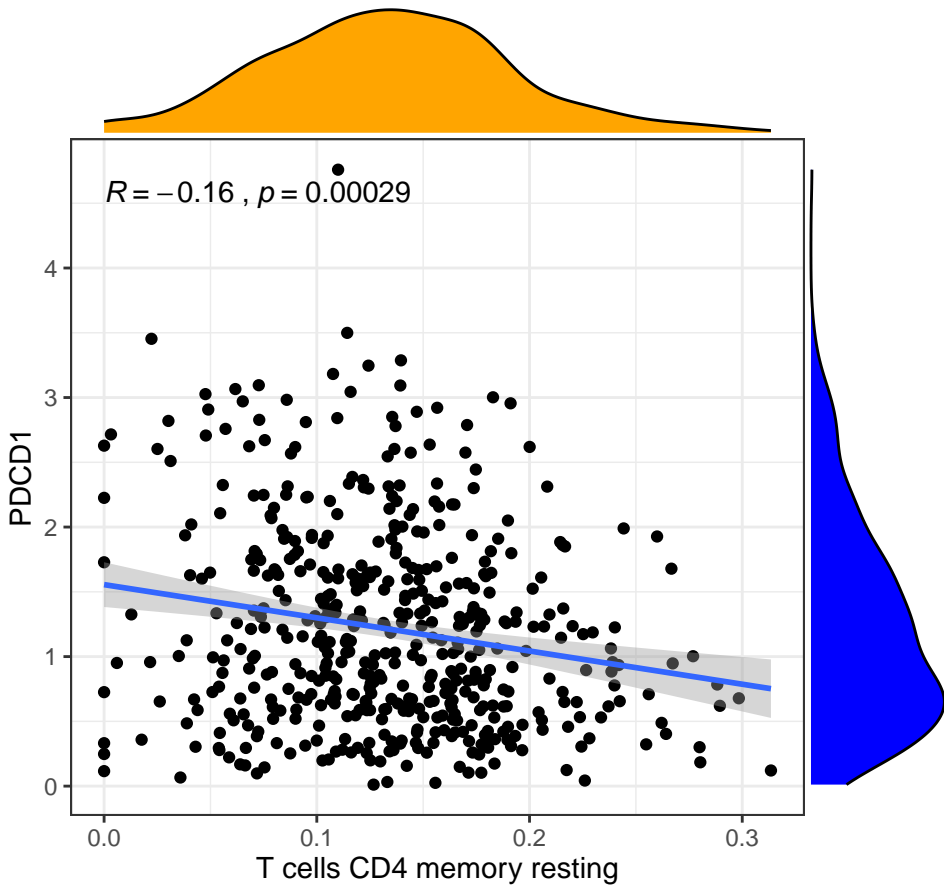

Cancer: LUSC

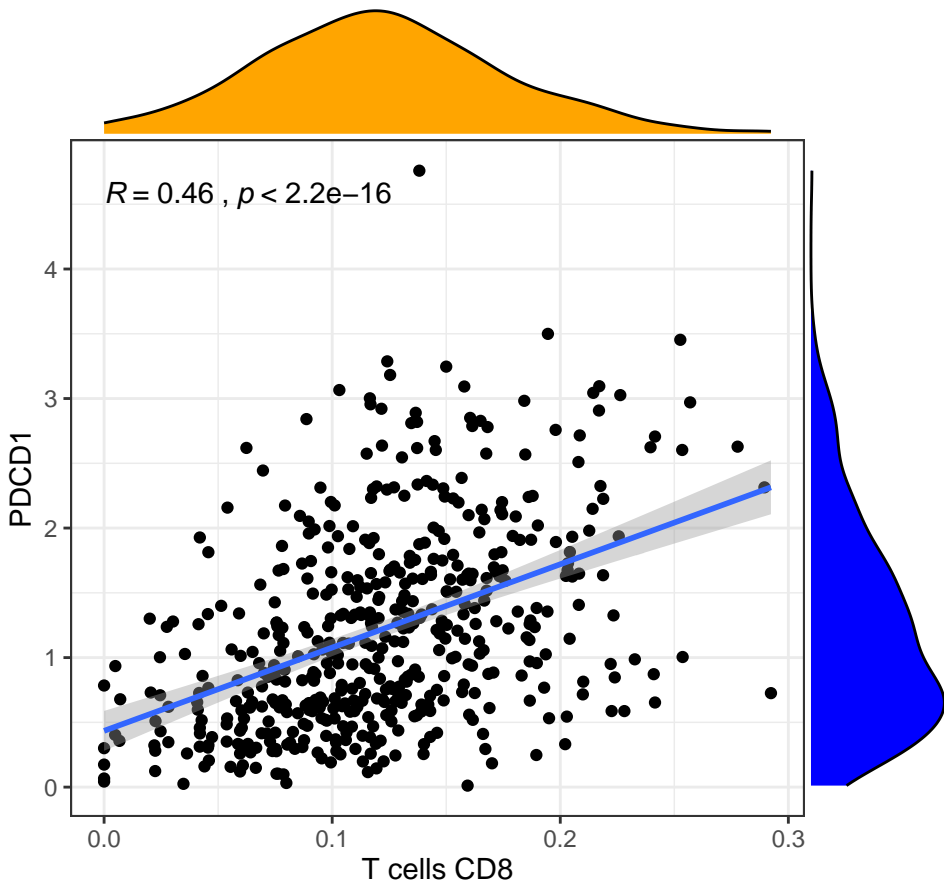

Cancer: LUSC

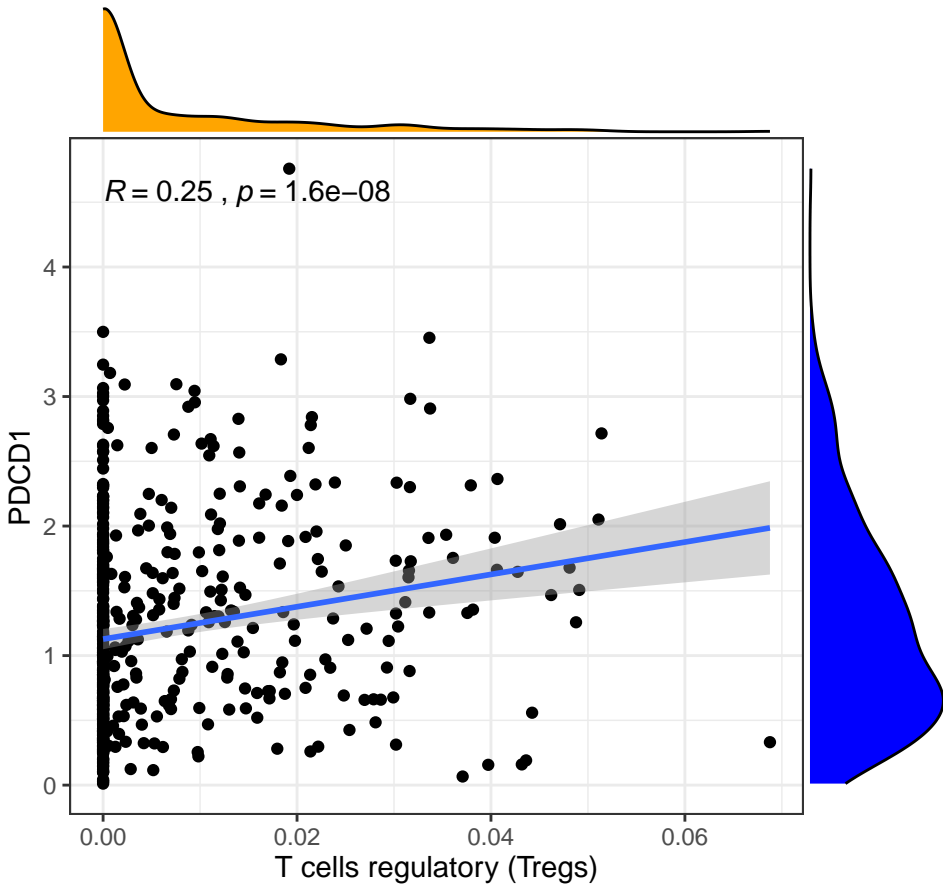

Cancer: MESO

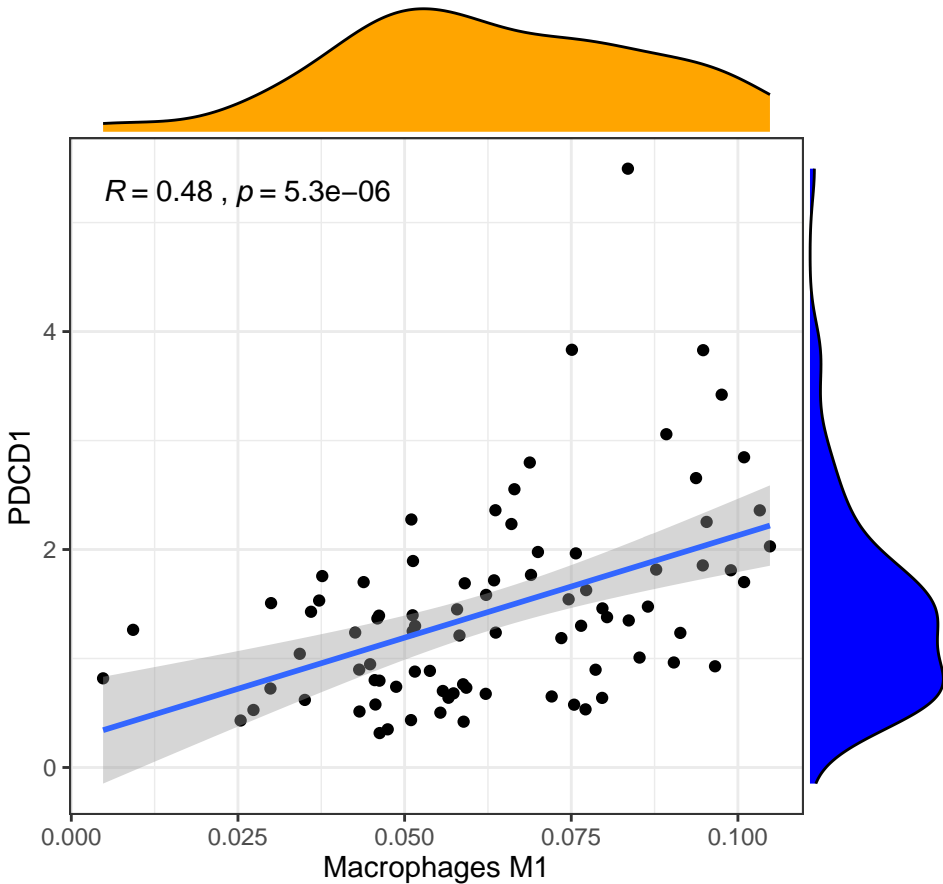

Cancer: MESO

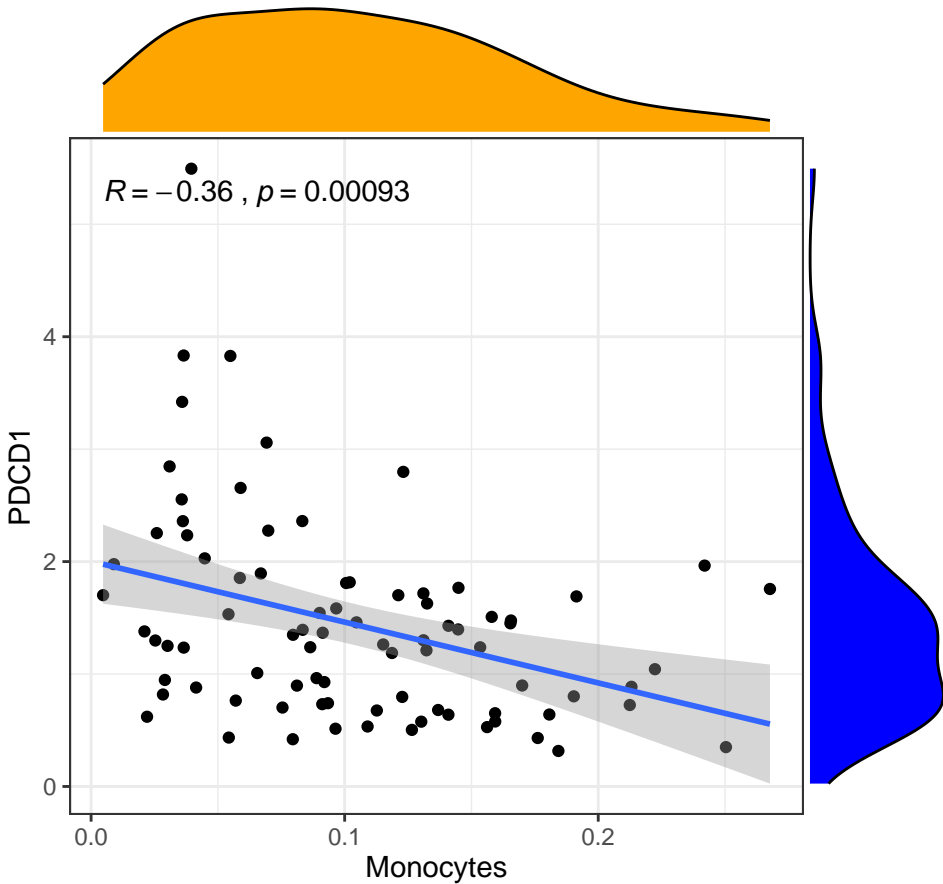

Cancer: MESO

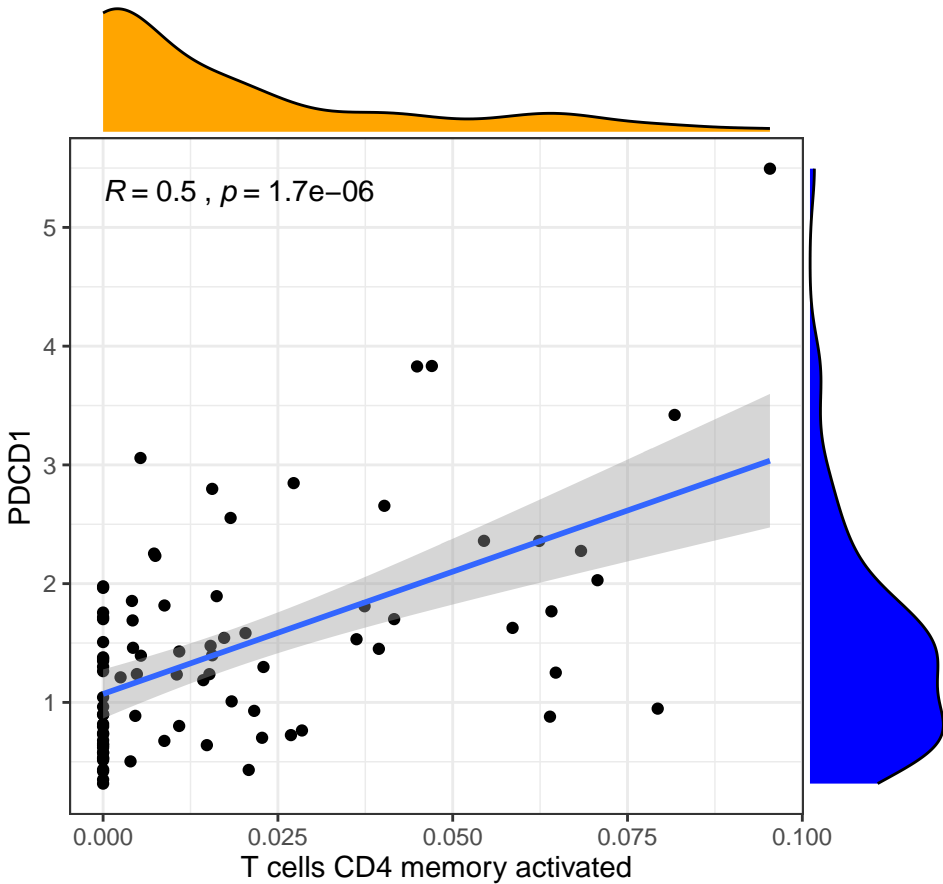

Cancer: MESO

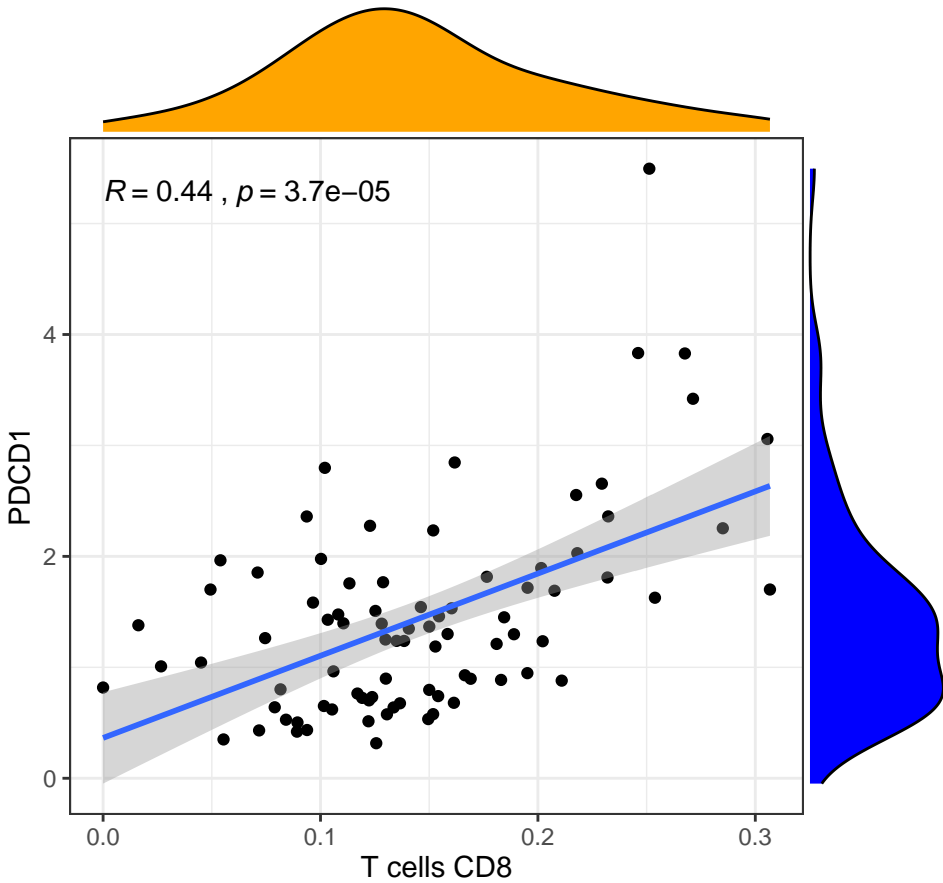

Cancer: OV

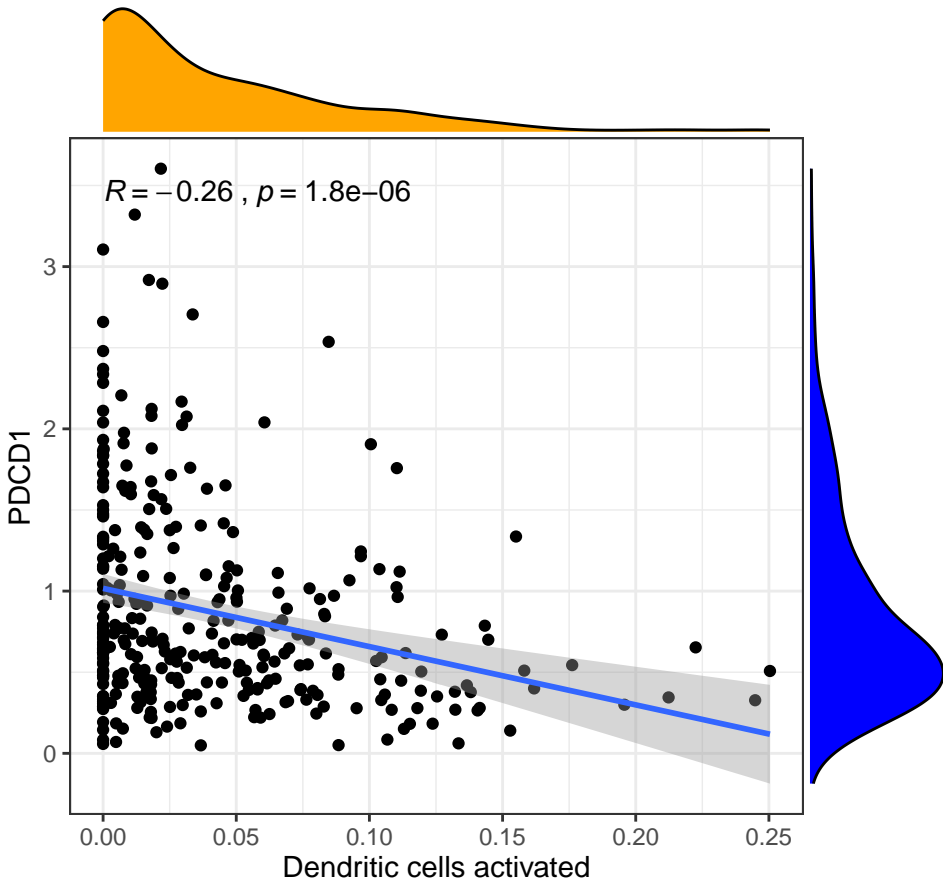

Cancer: OV

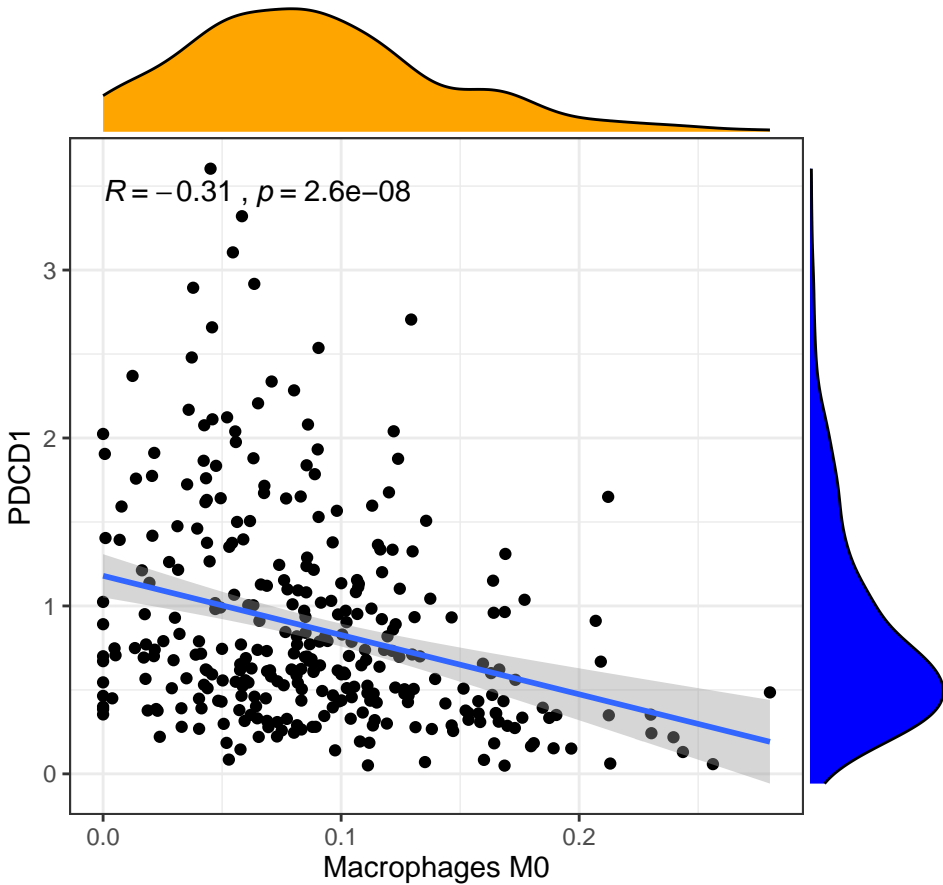

Cancer: OV

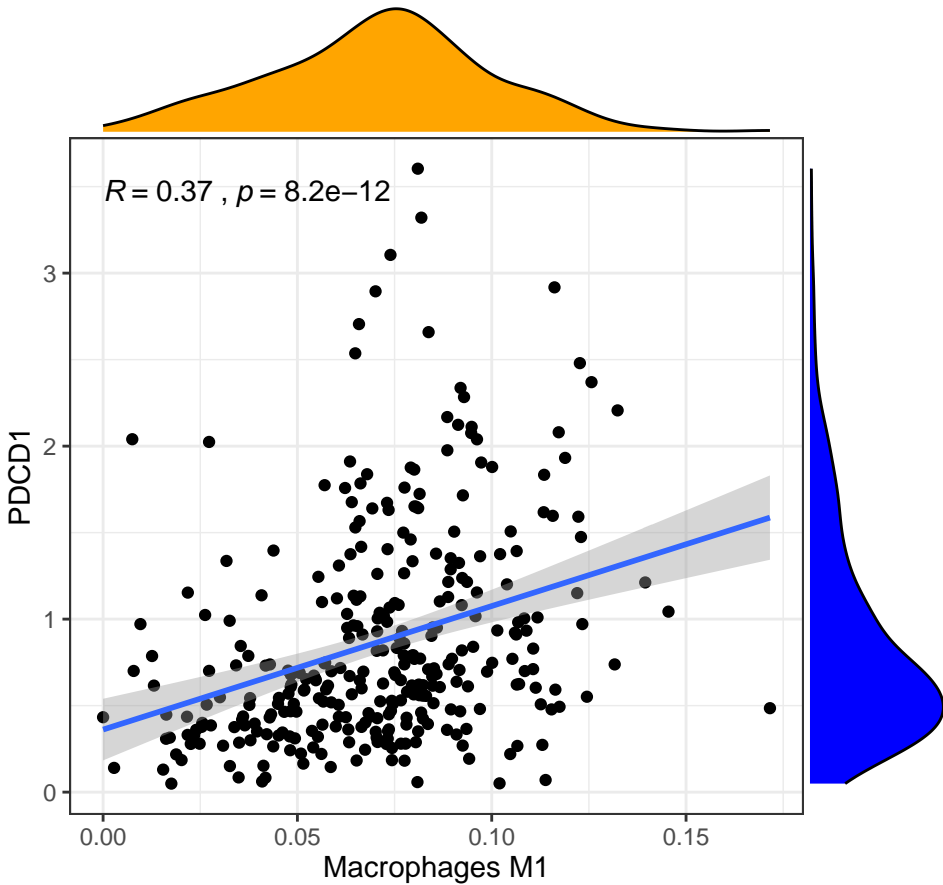

Cancer: OV

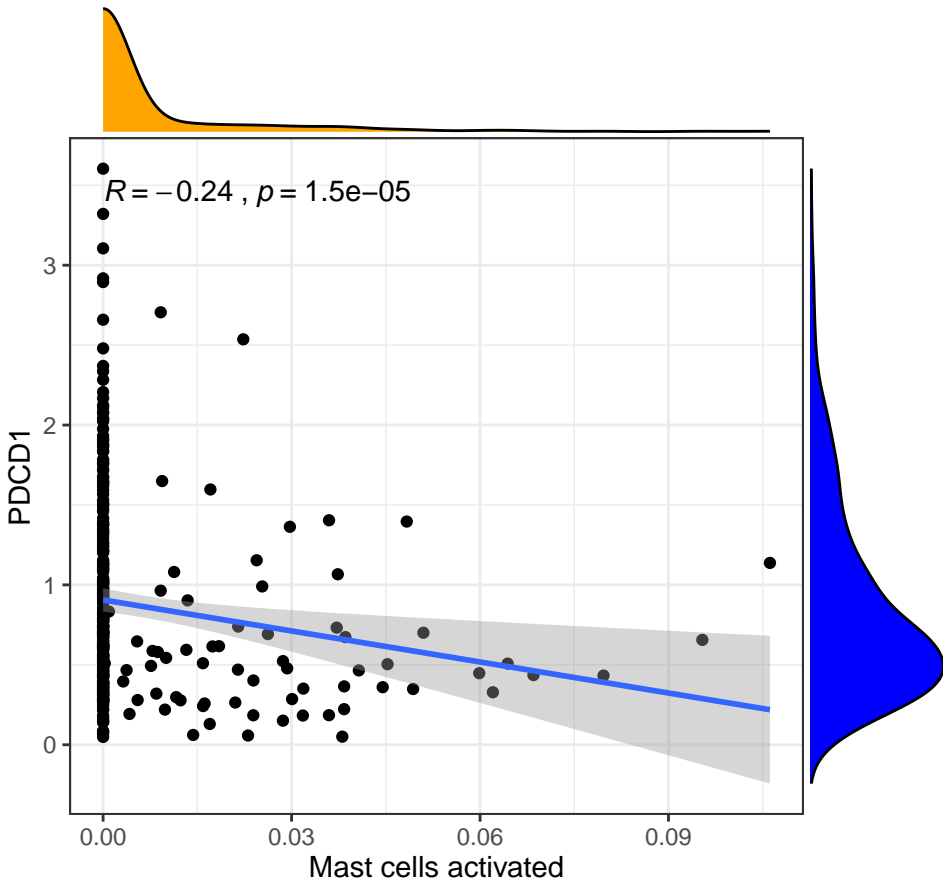

Cancer: OV

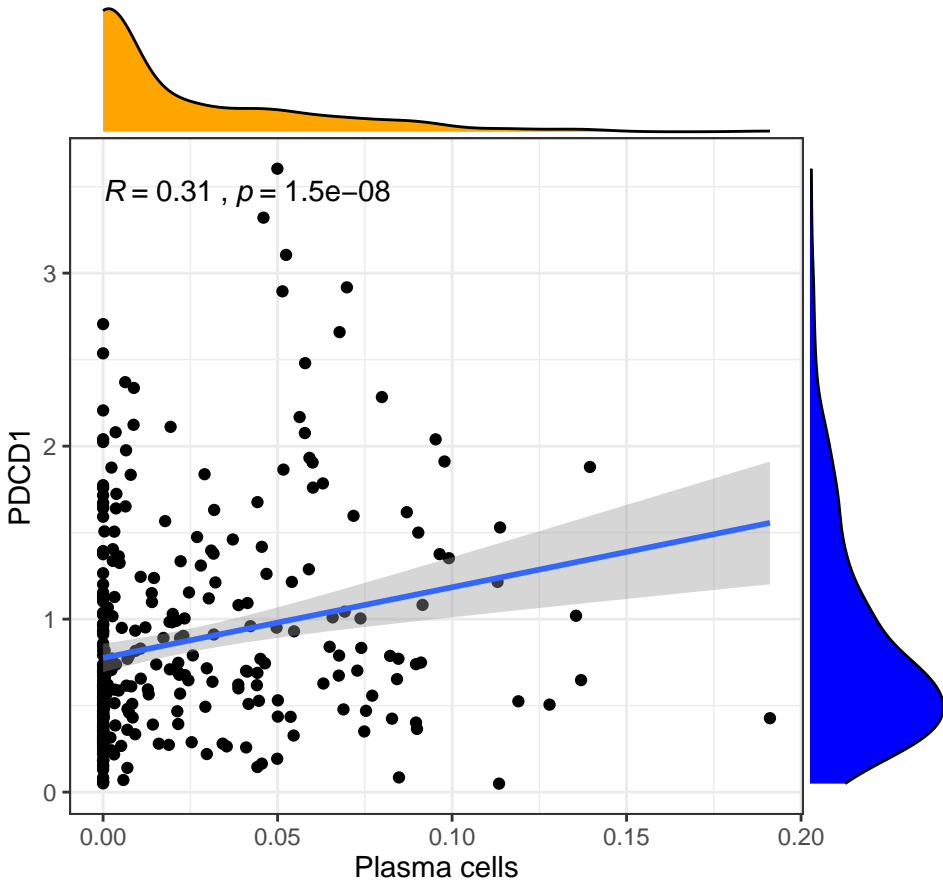

Cancer: OV

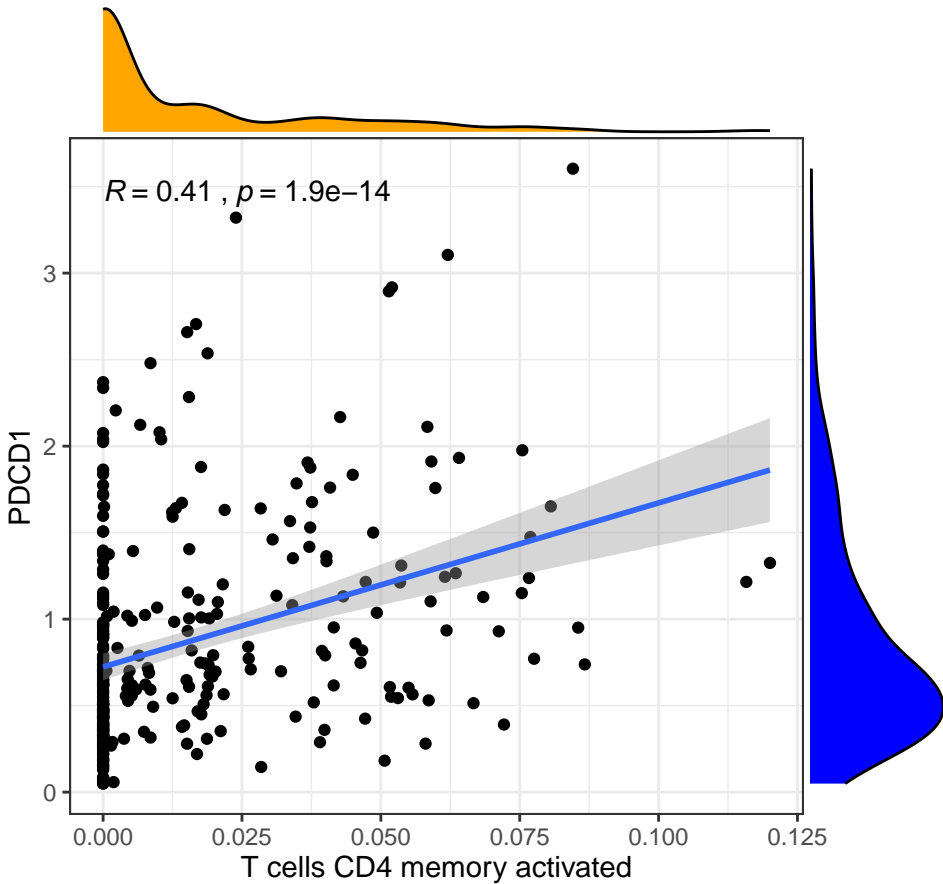

Cancer: OV

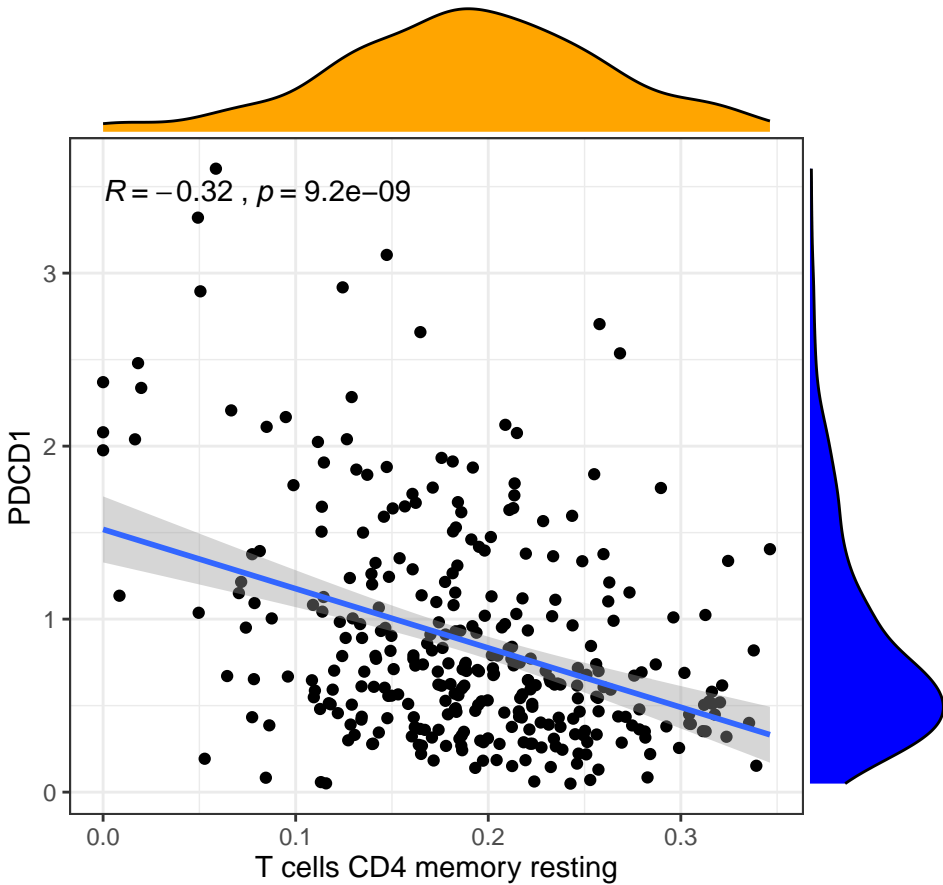

Cancer: OV

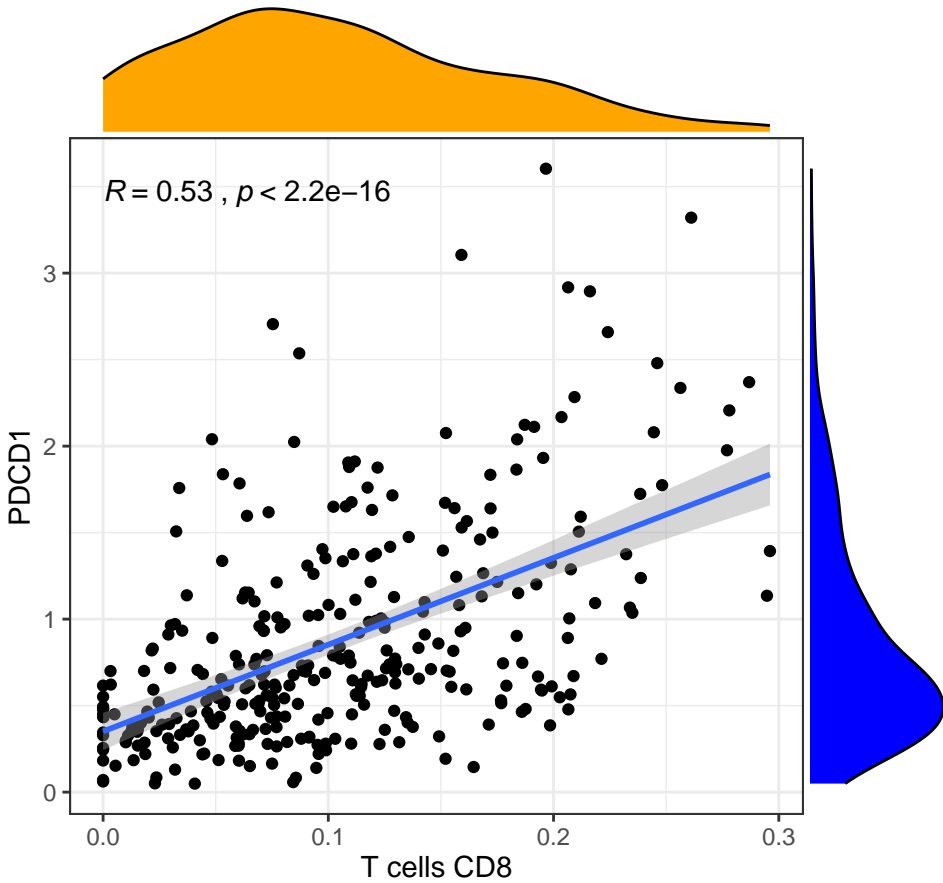

Cancer: OV

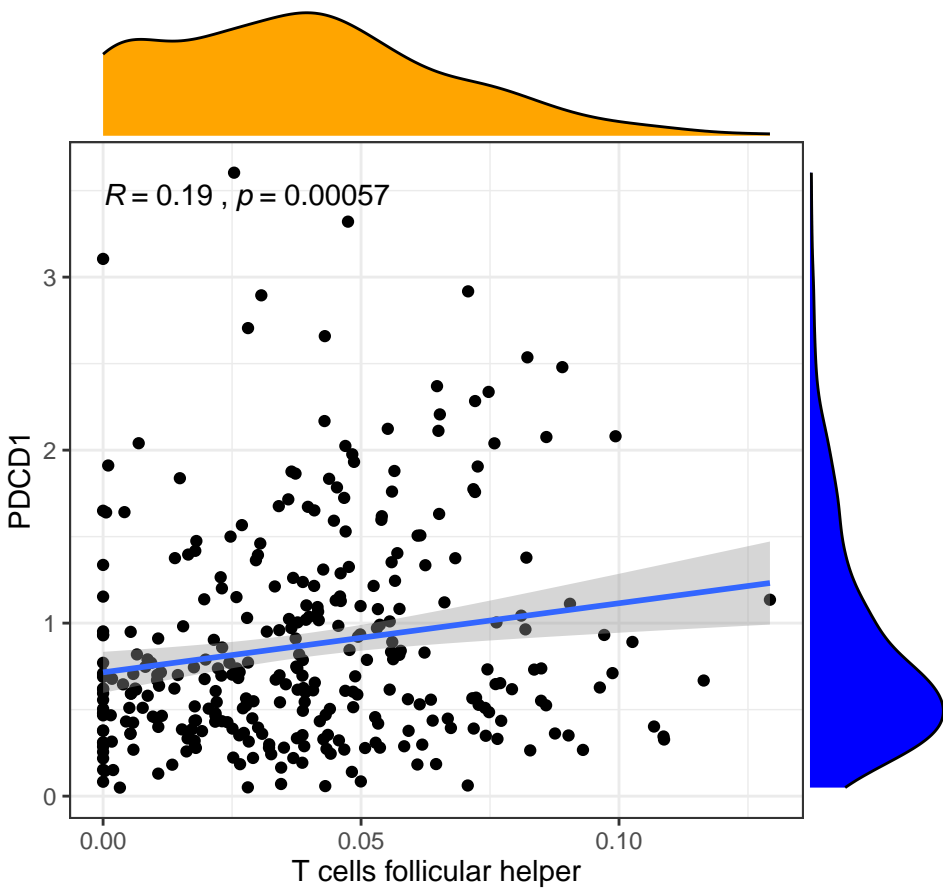

Cancer: OV

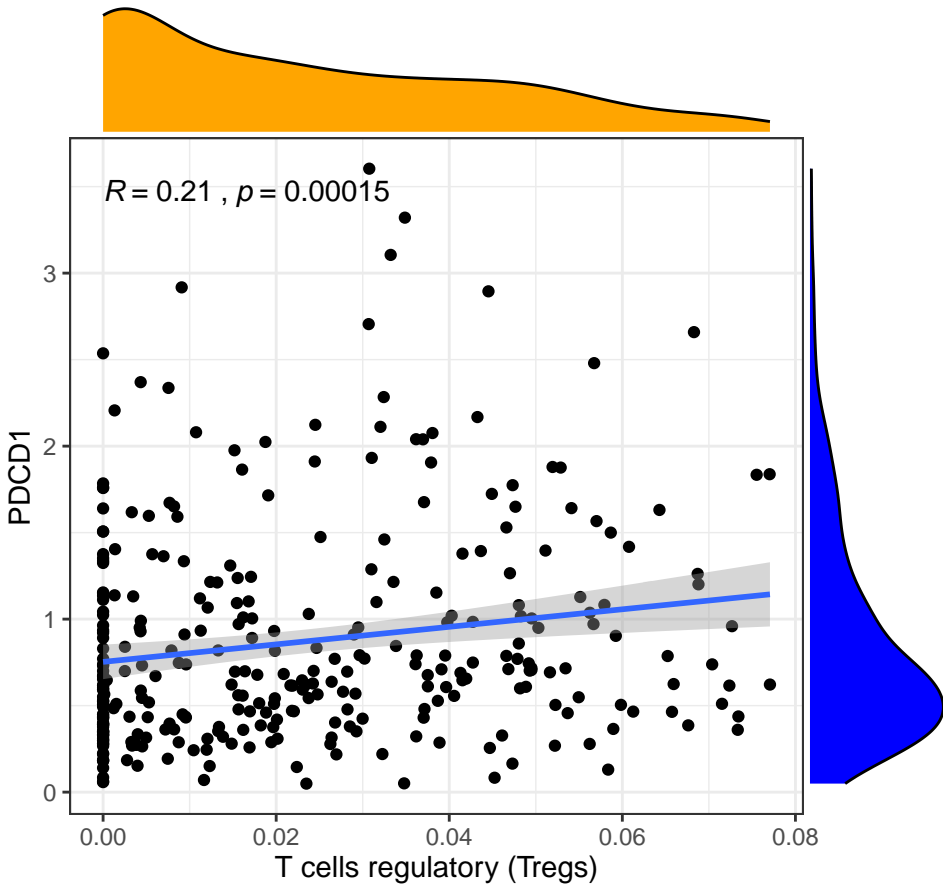

Cancer: PAAD

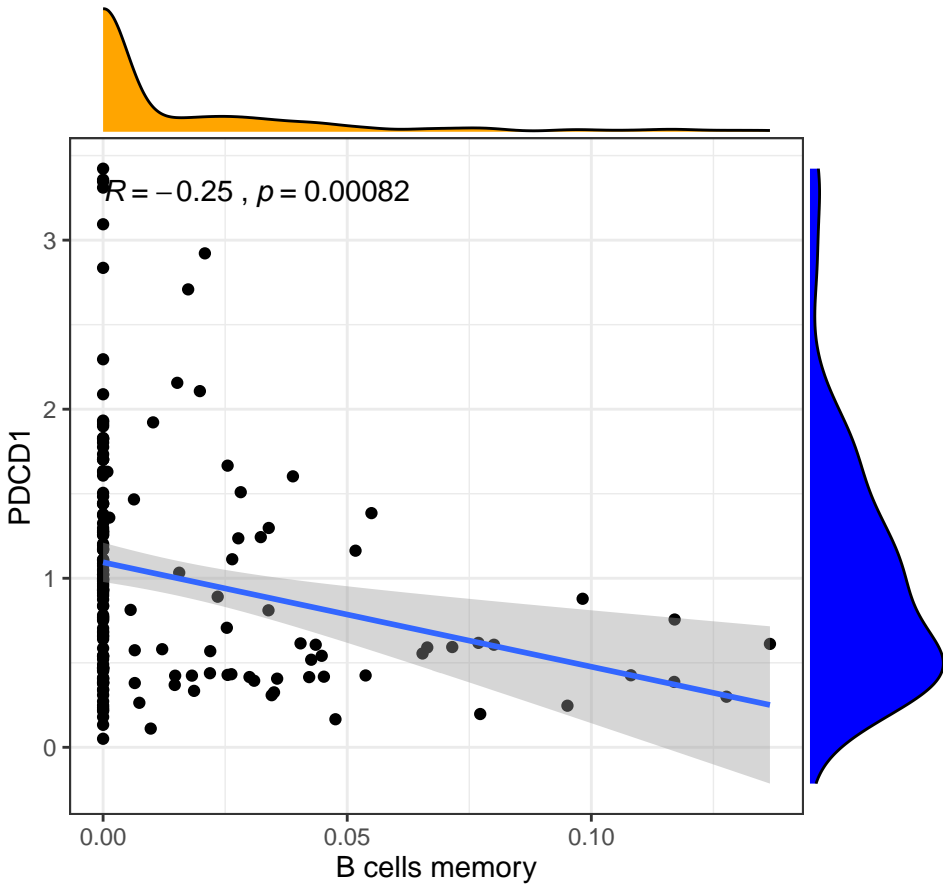

Cancer: PAAD

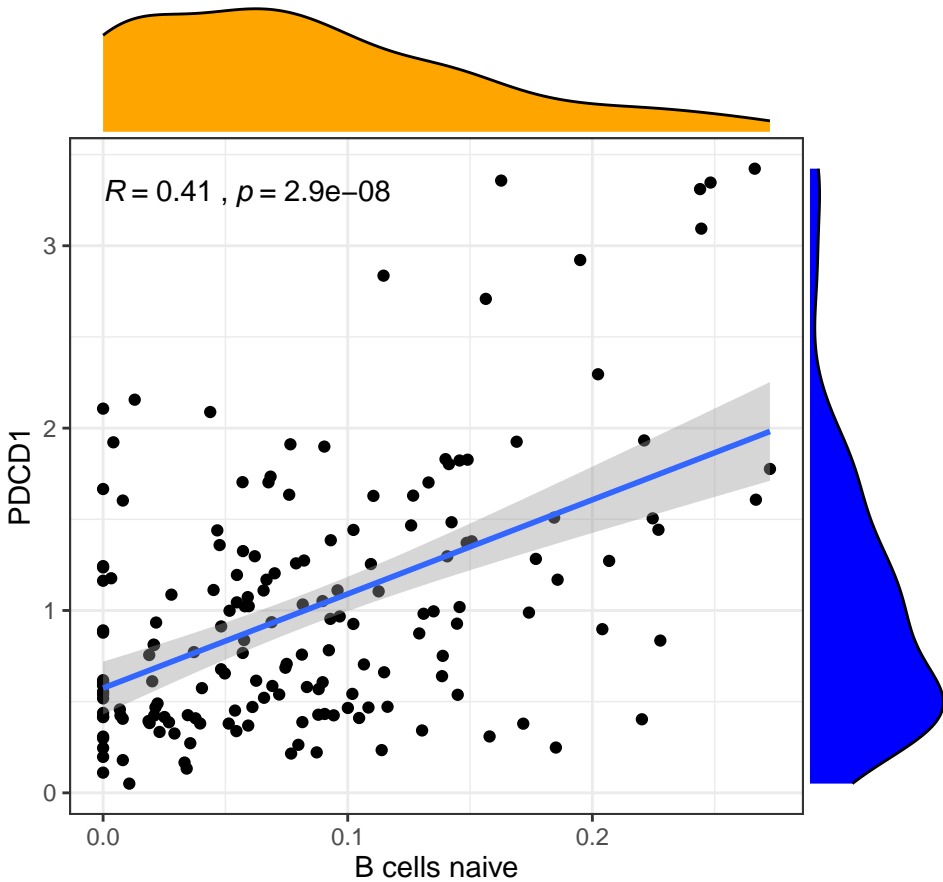

Cancer: PAAD

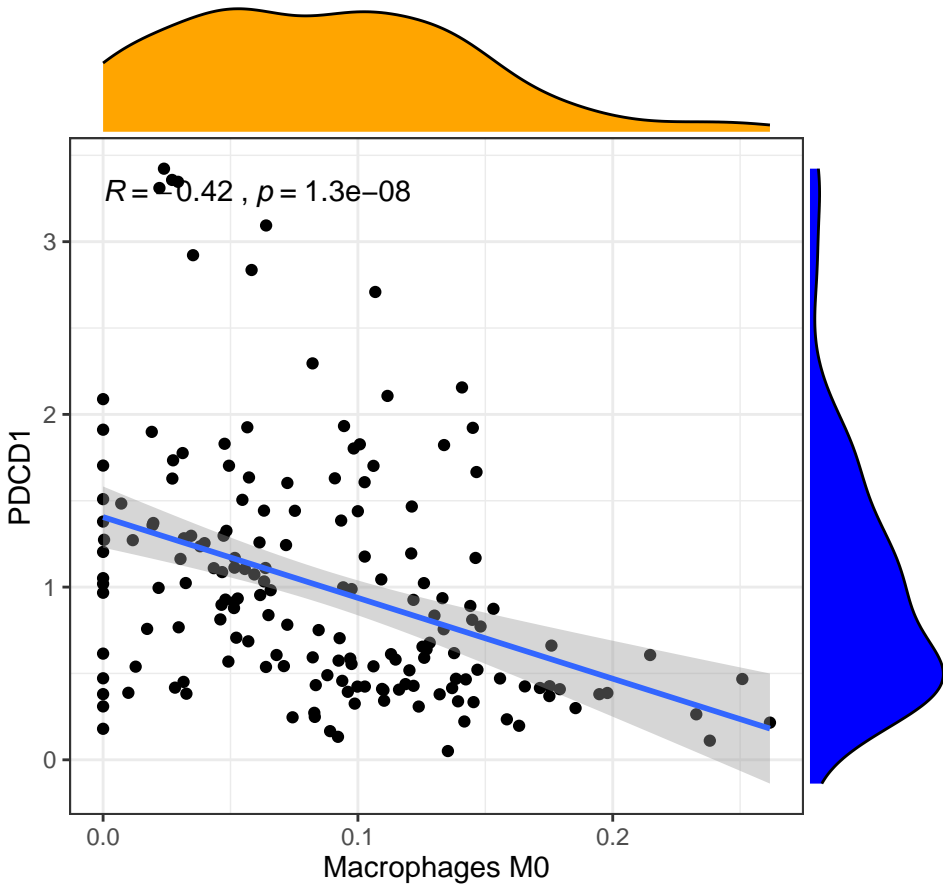

Cancer: PAAD

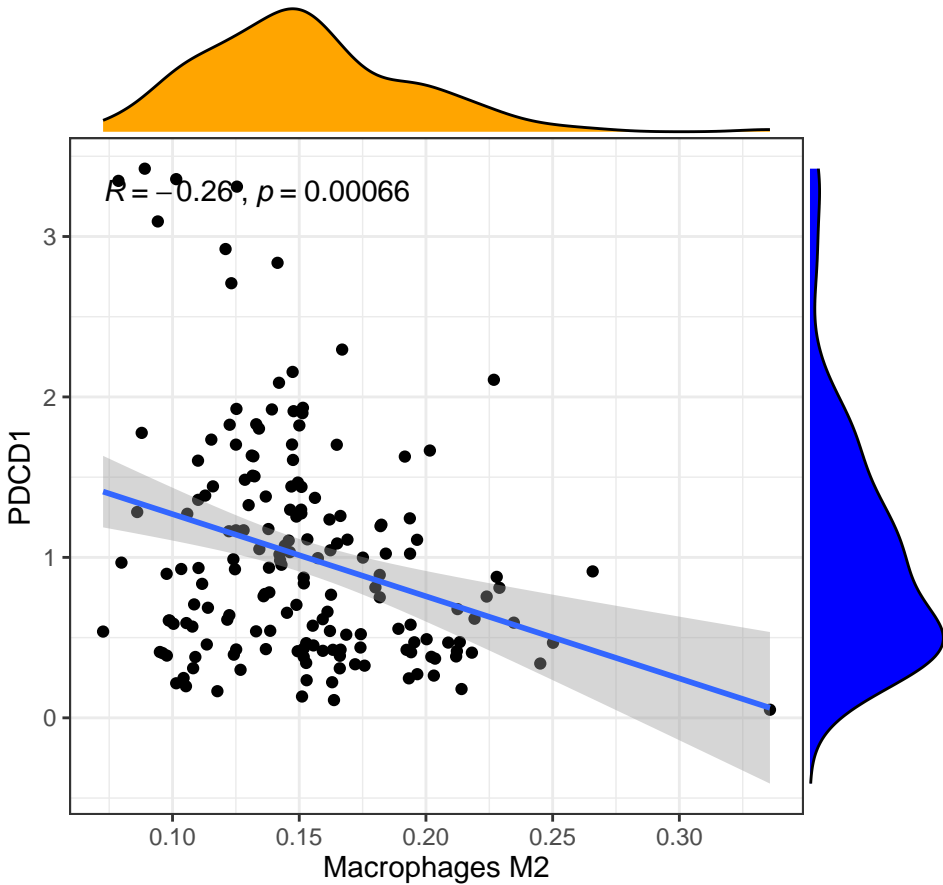

Cancer: PAAD

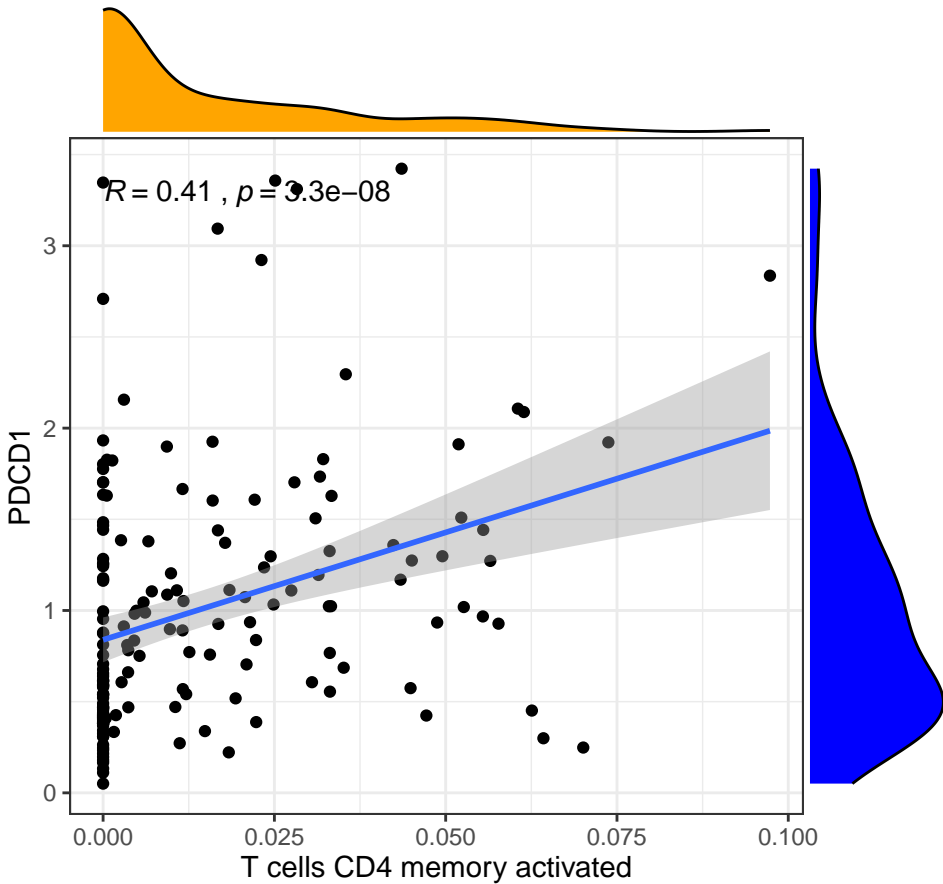

Cancer: PAAD

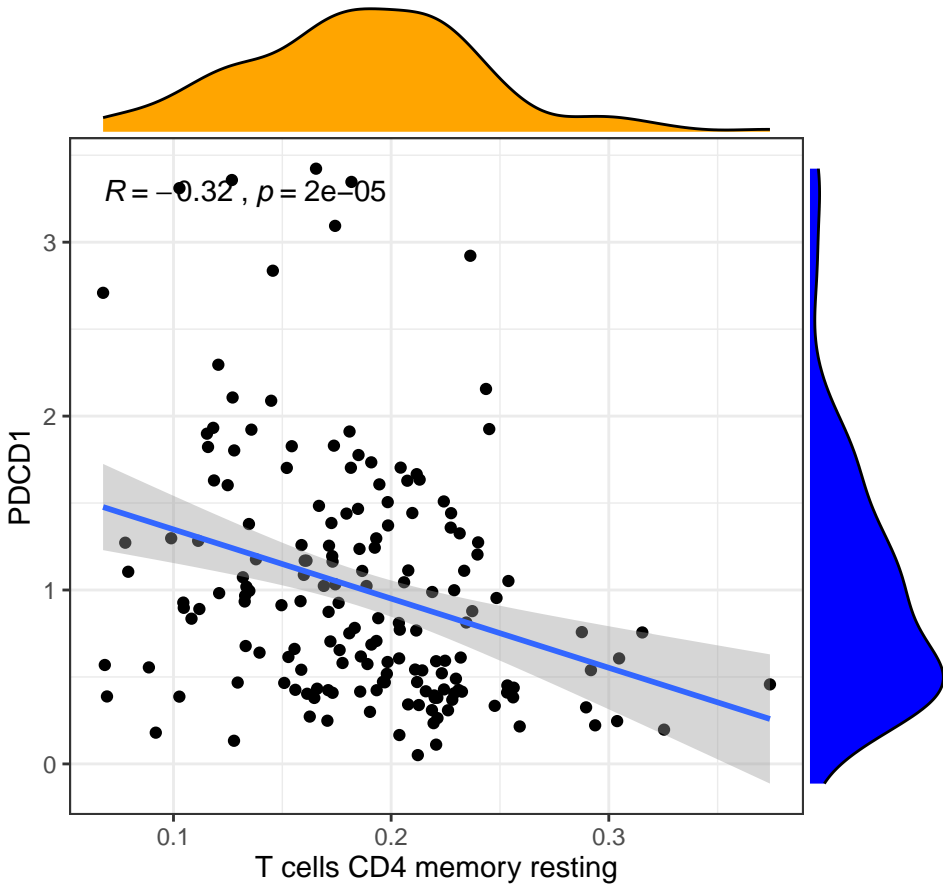

Cancer: PAAD

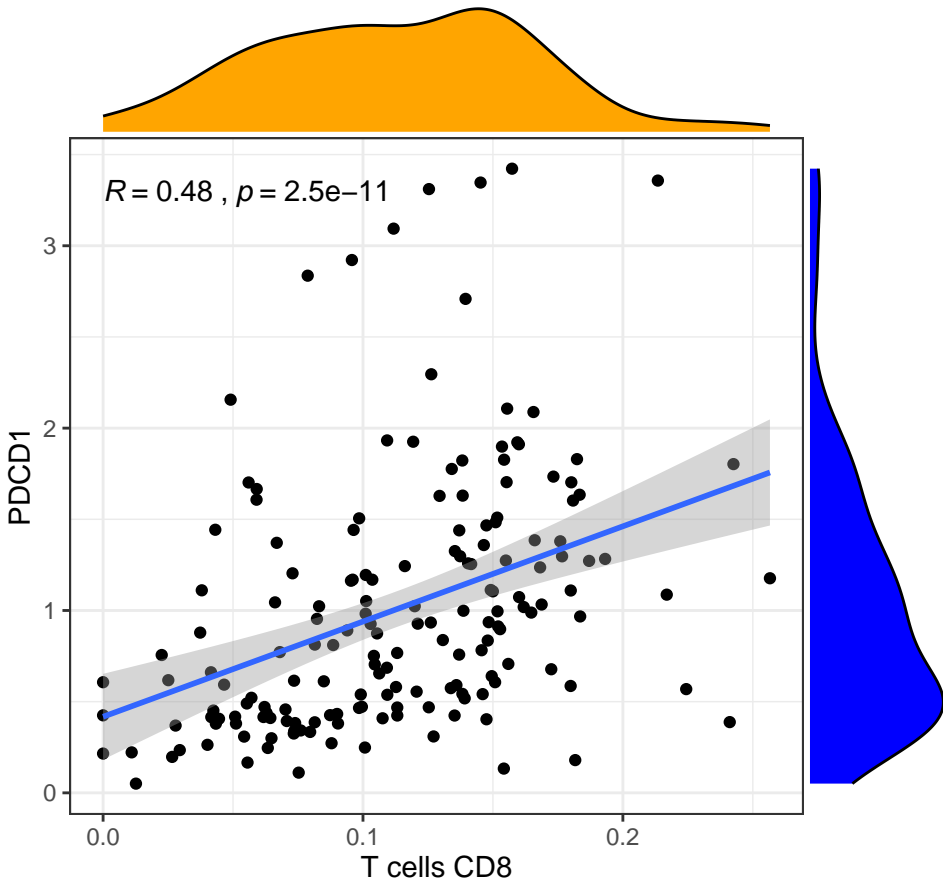

Cancer: PCPG

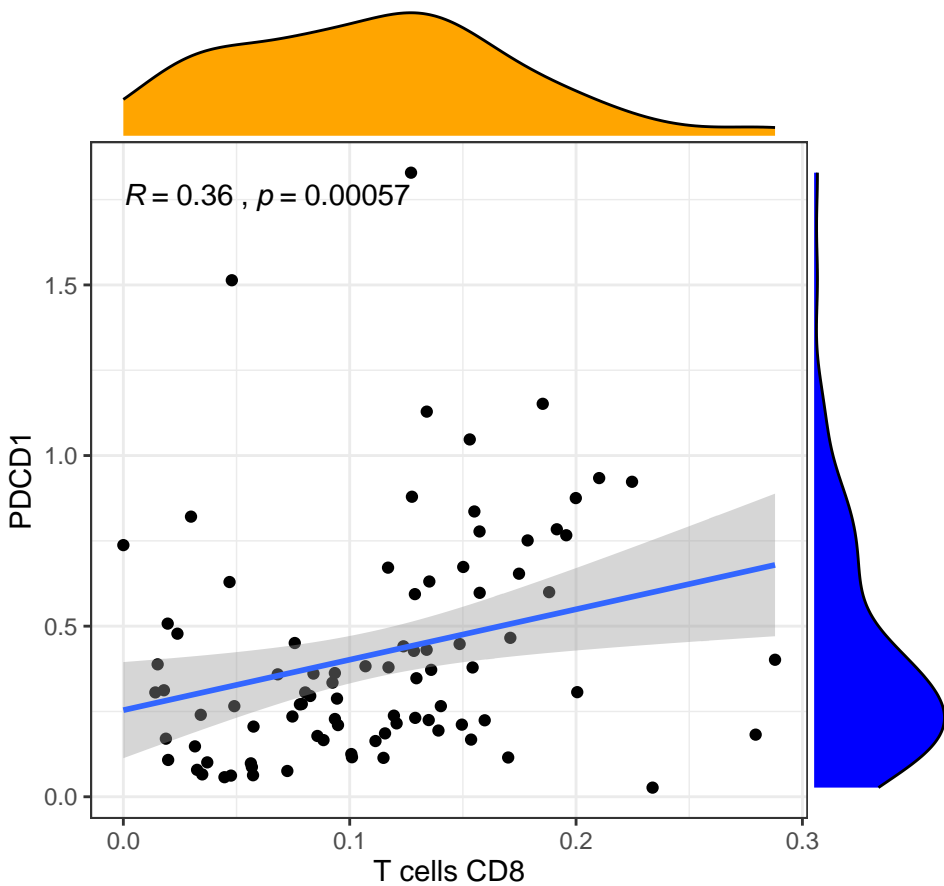

Cancer: PRAD

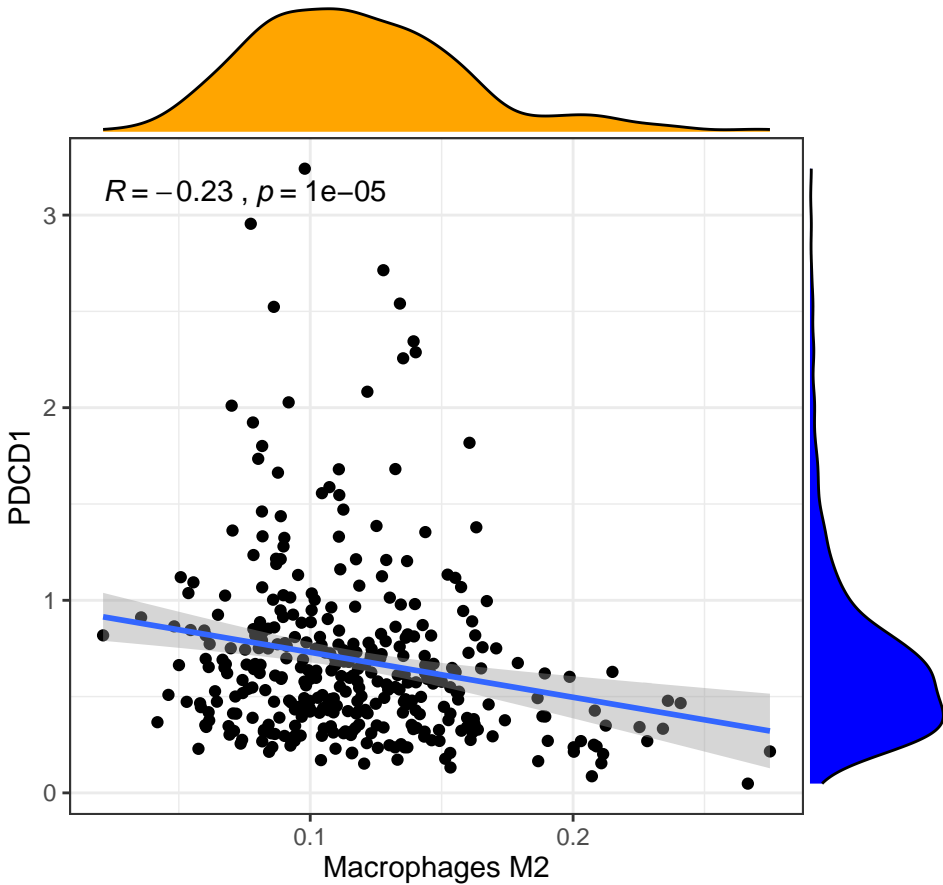

Cancer: PRAD

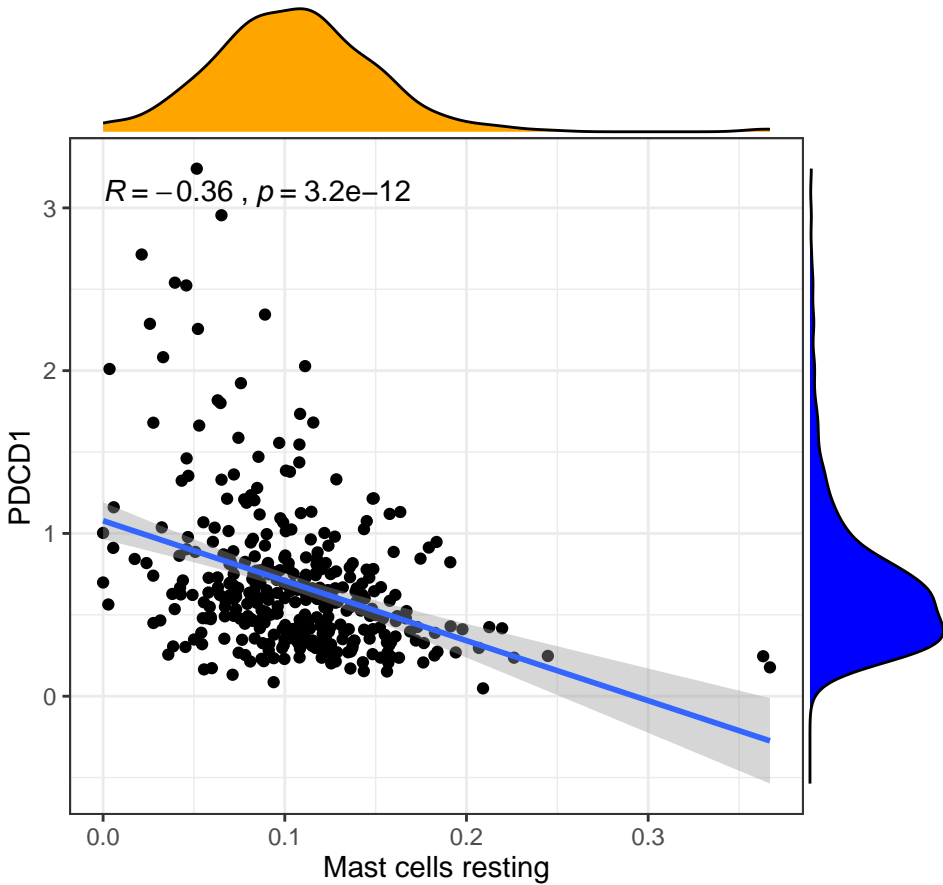

Cancer: PRAD

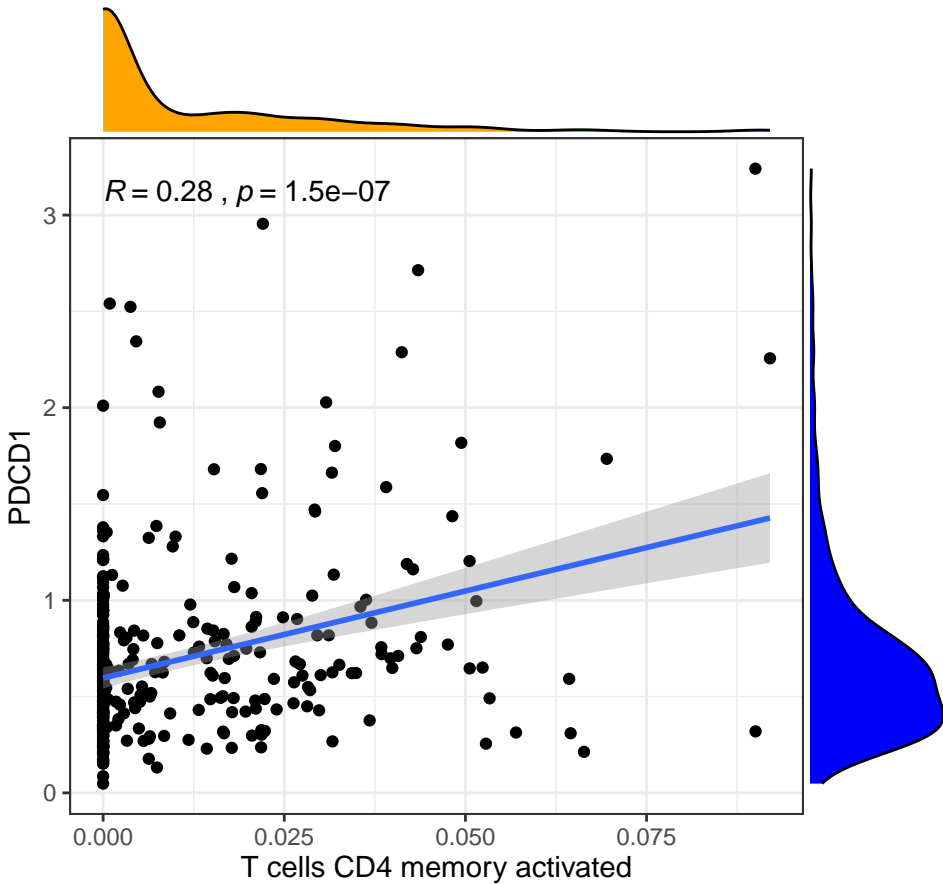

Cancer: PRAD

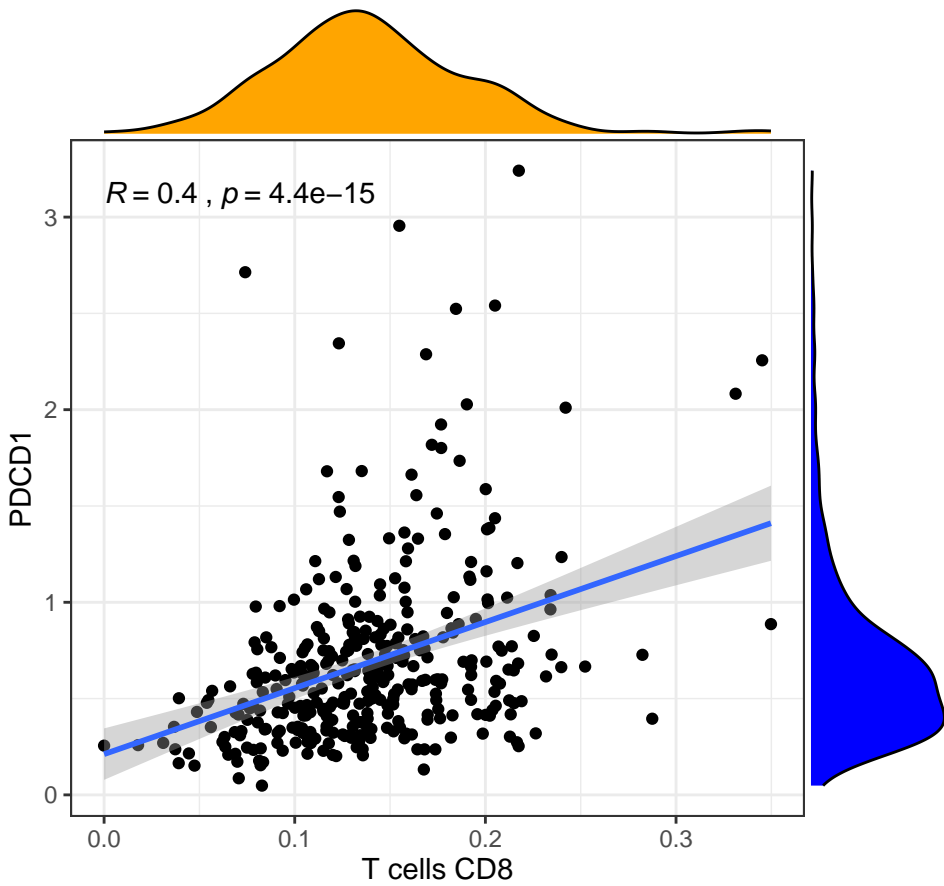

Cancer: PRAD

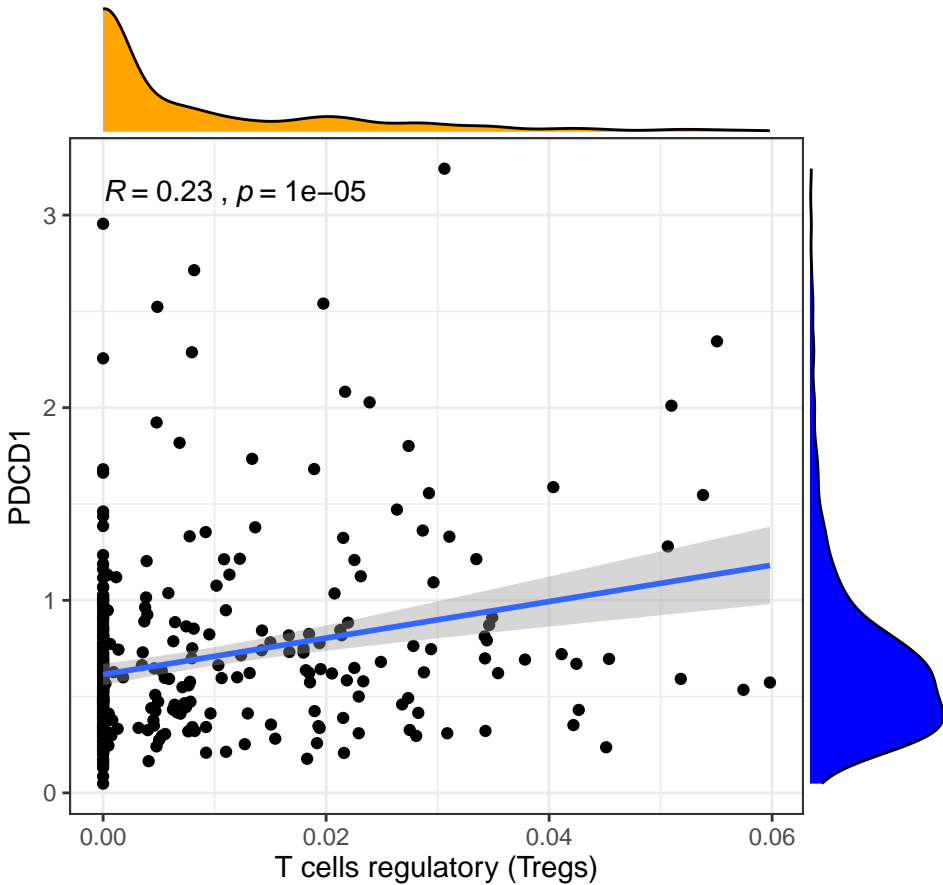

Cancer: READ

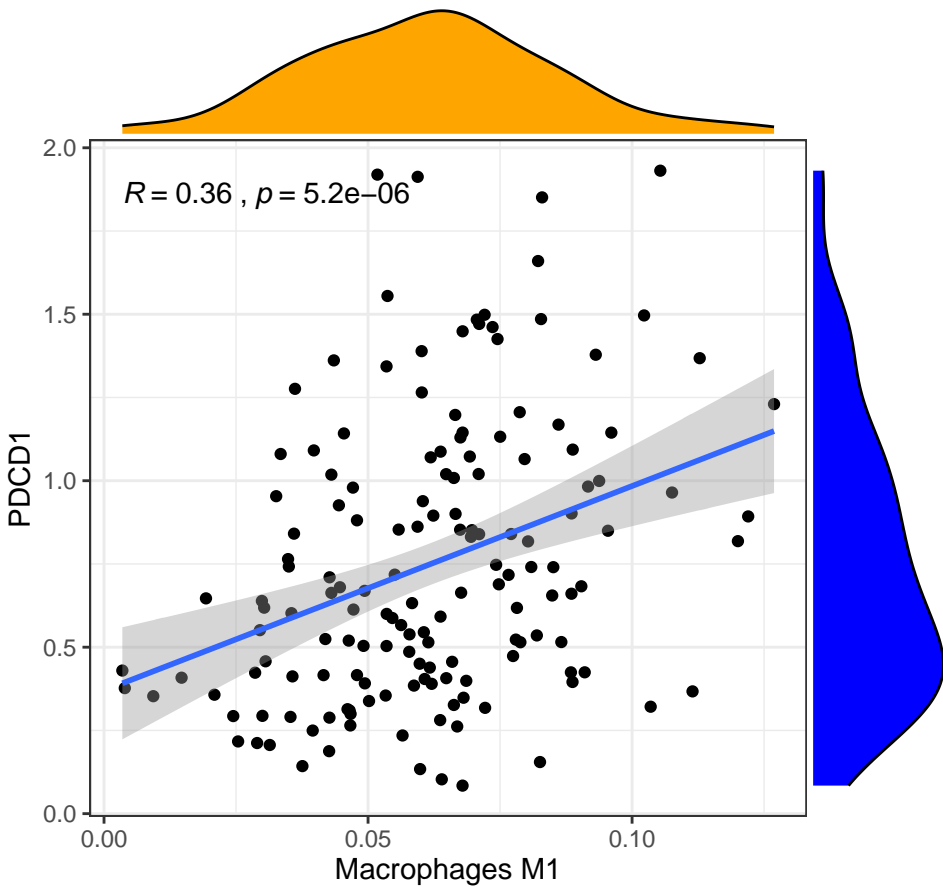

Cancer: READ

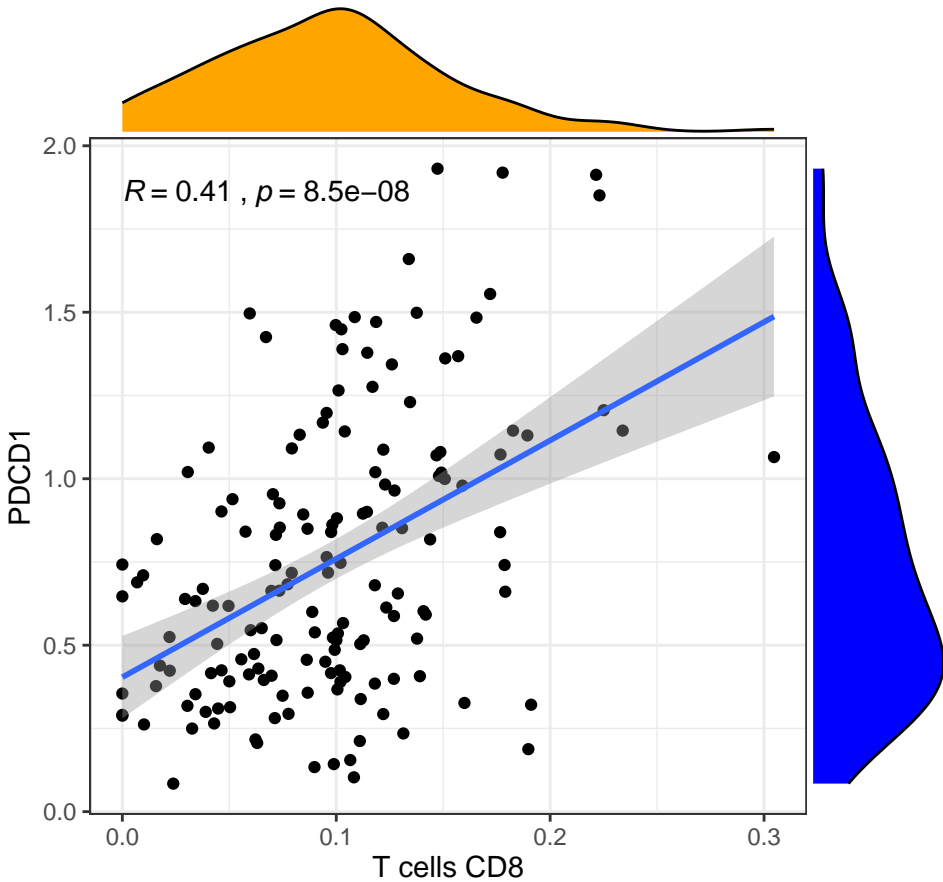

Cancer: SARC

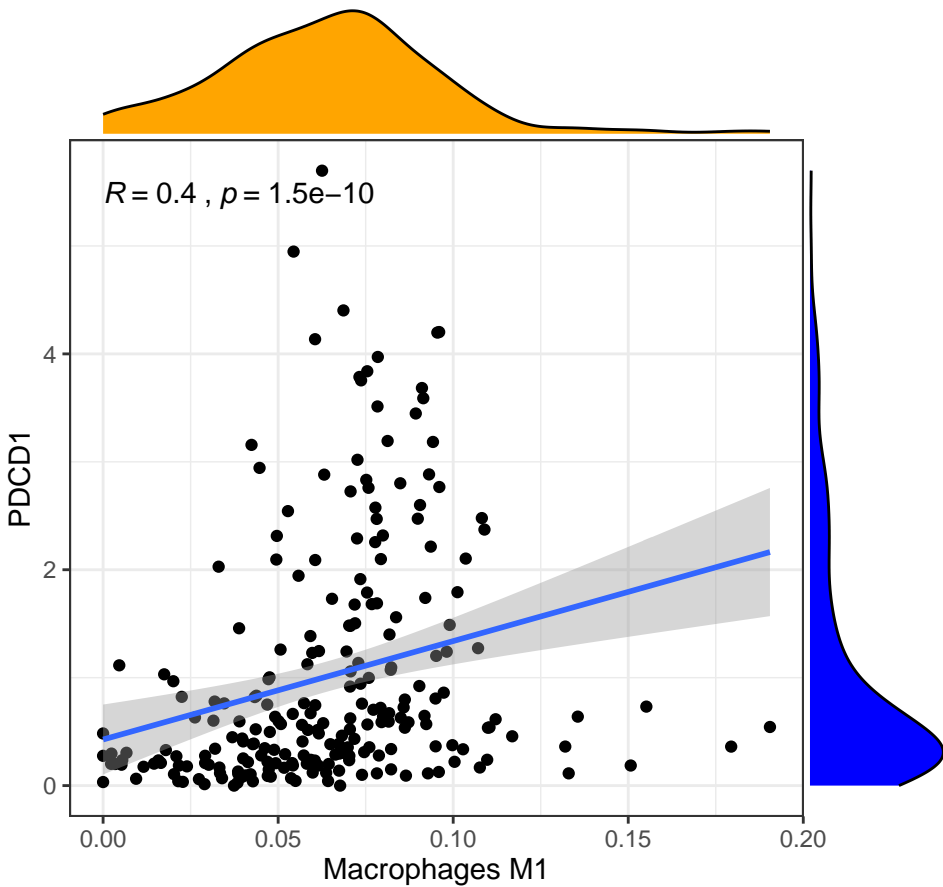

Cancer: SARC

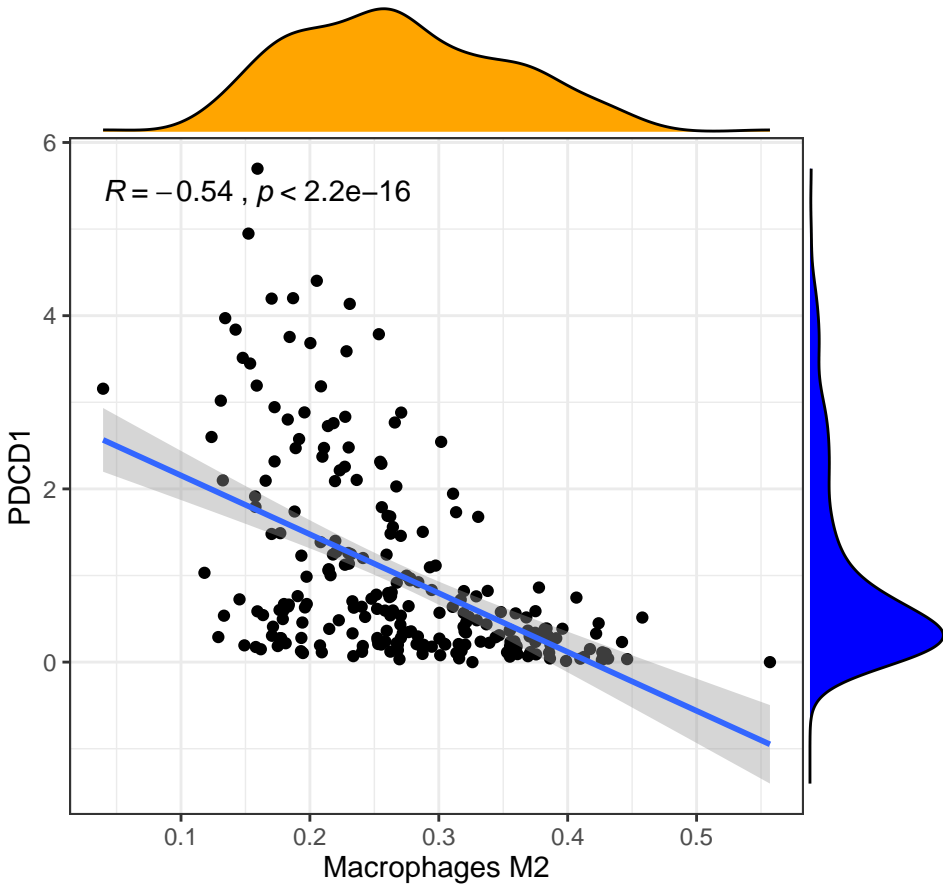

Cancer: SARC

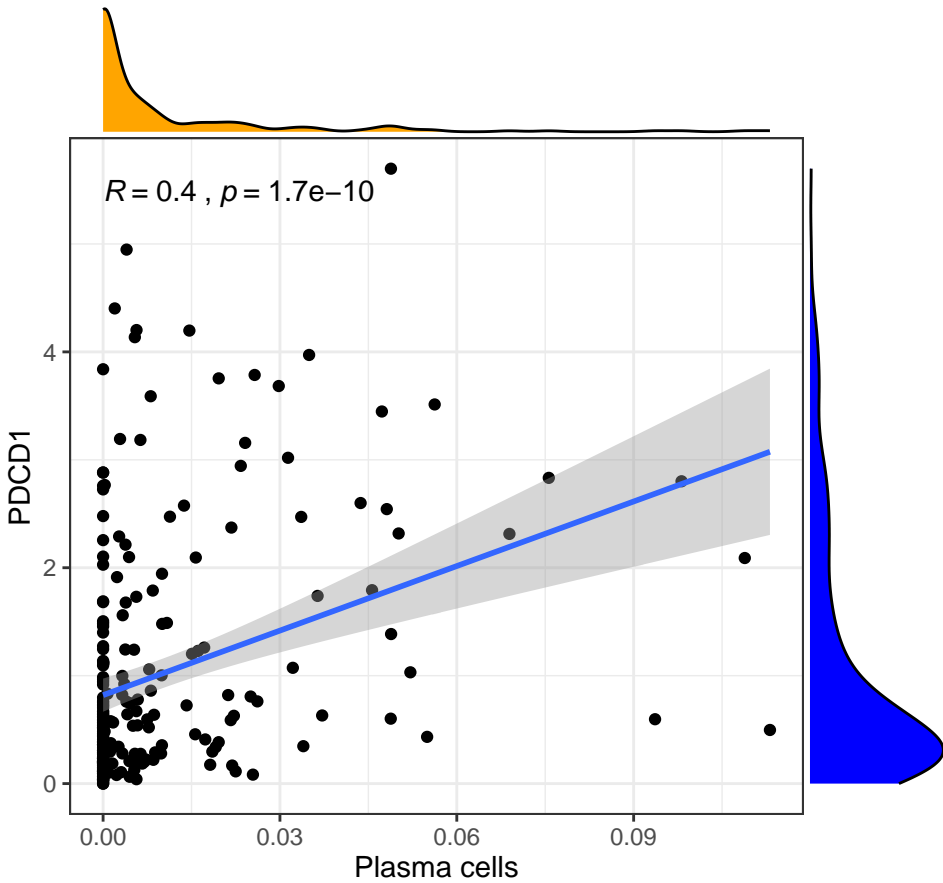

Cancer: SARC

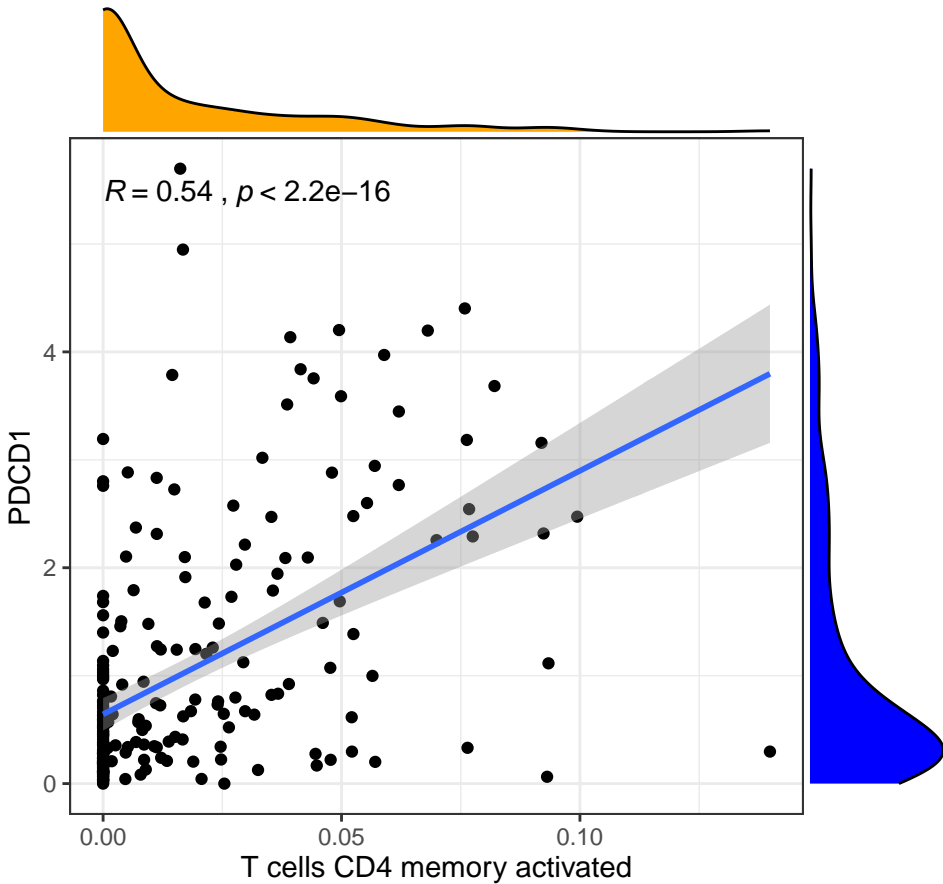

Cancer: SARC

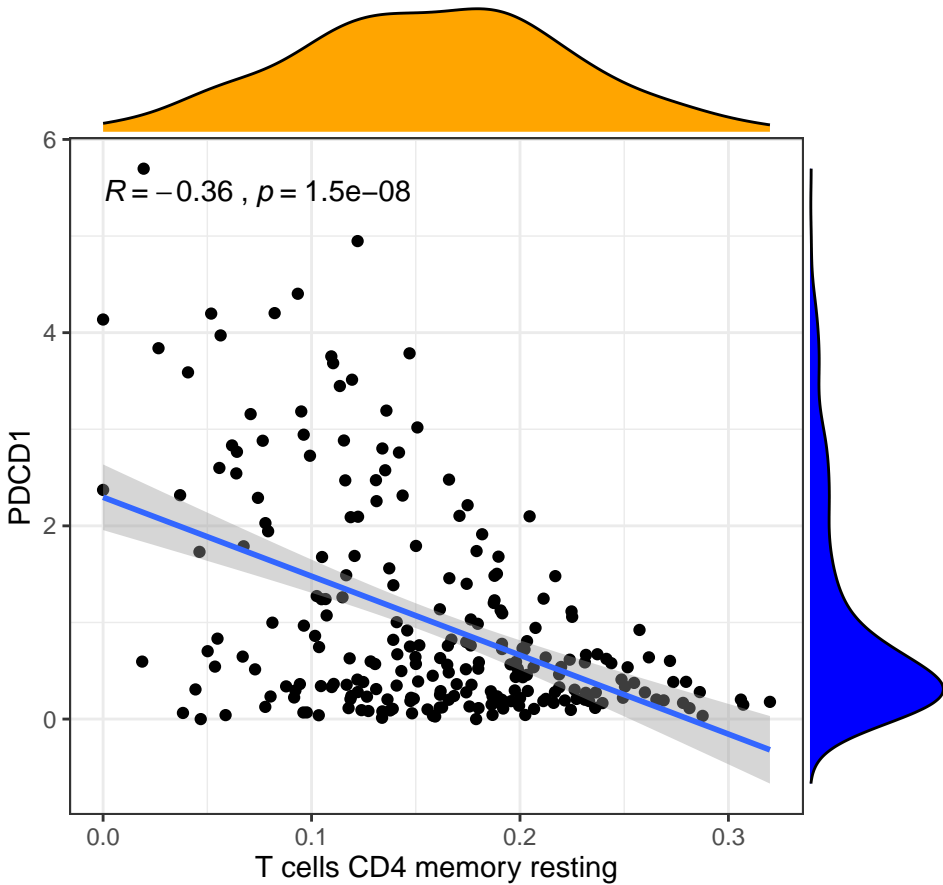

Cancer: SARC

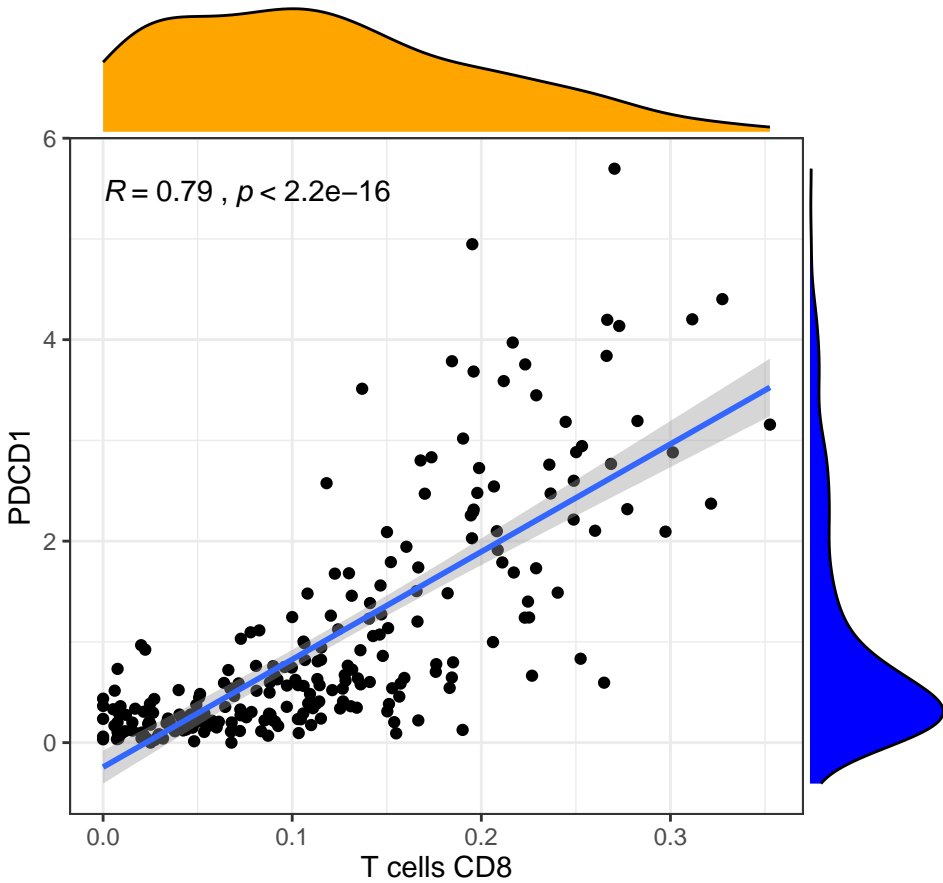

Cancer: SARC

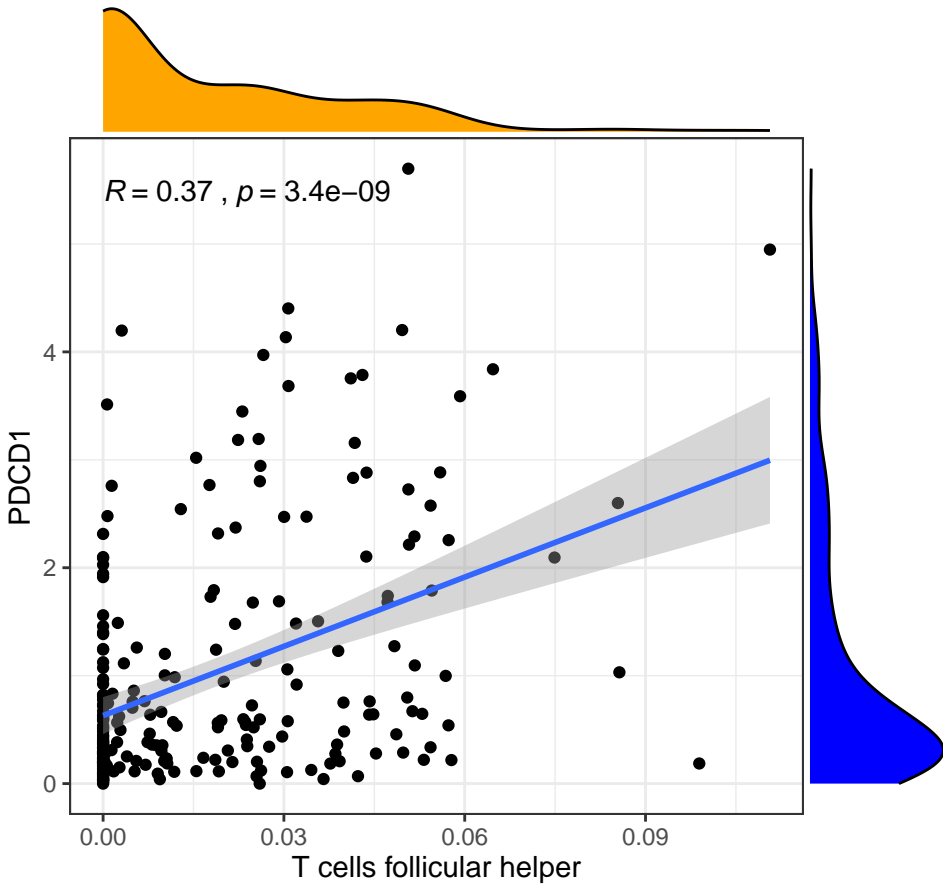

Cancer: SARC

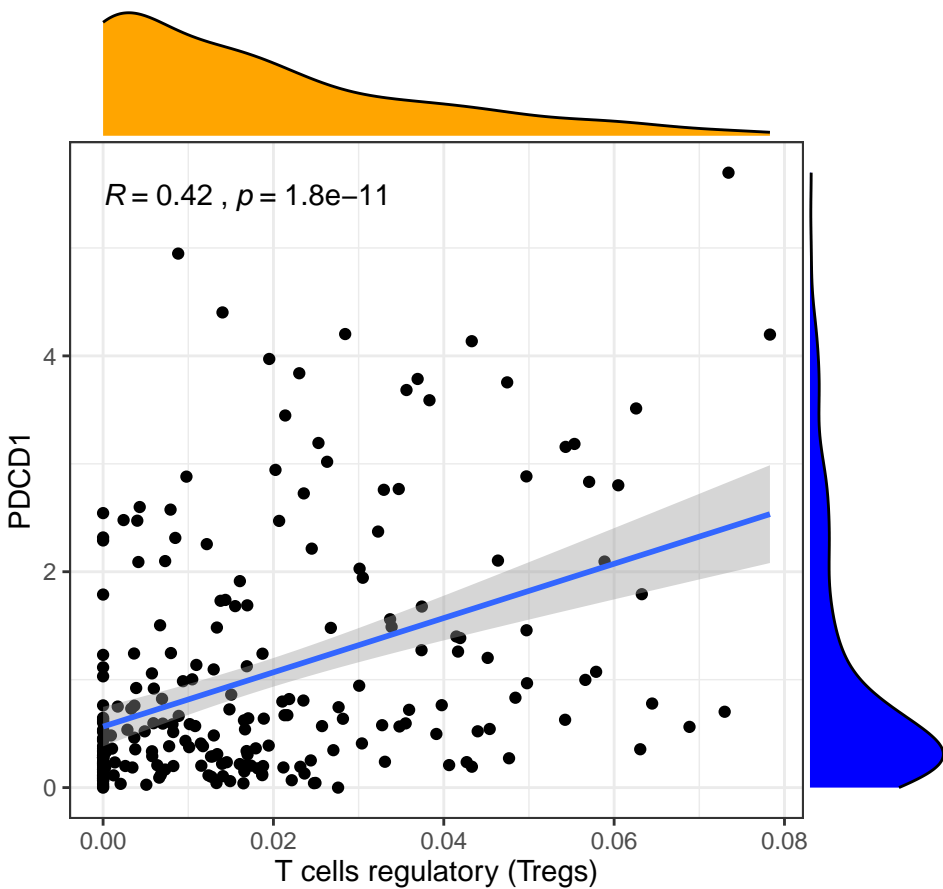

Cancer: STAD

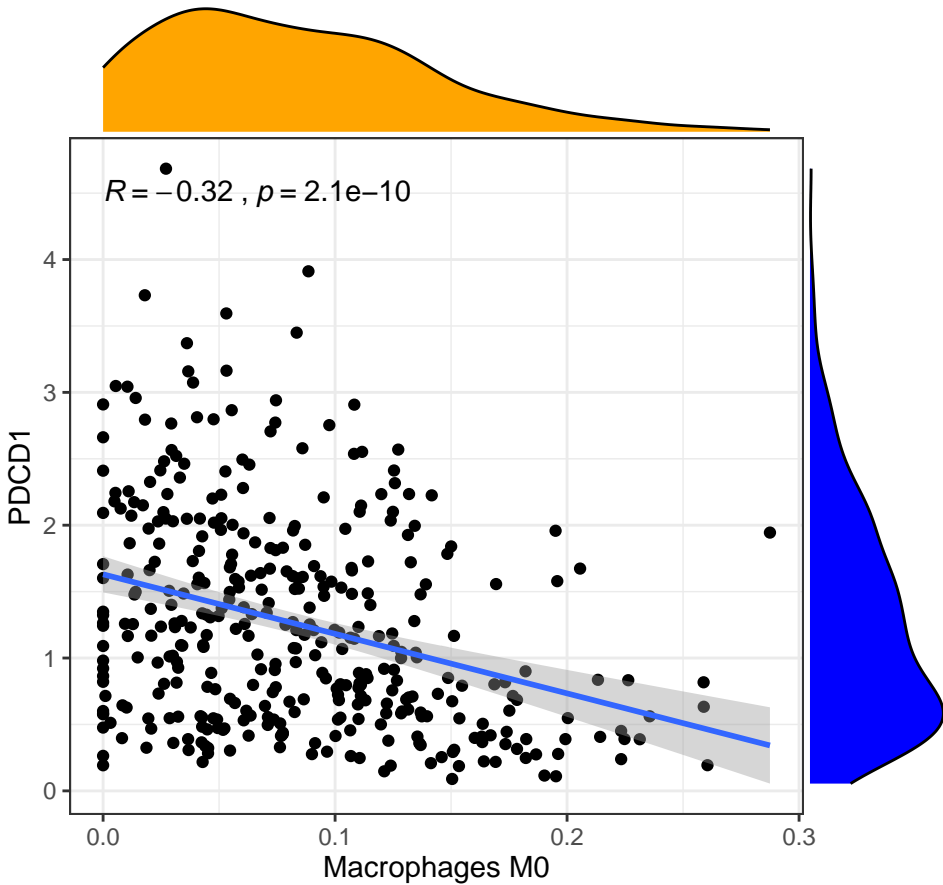

Cancer: STAD

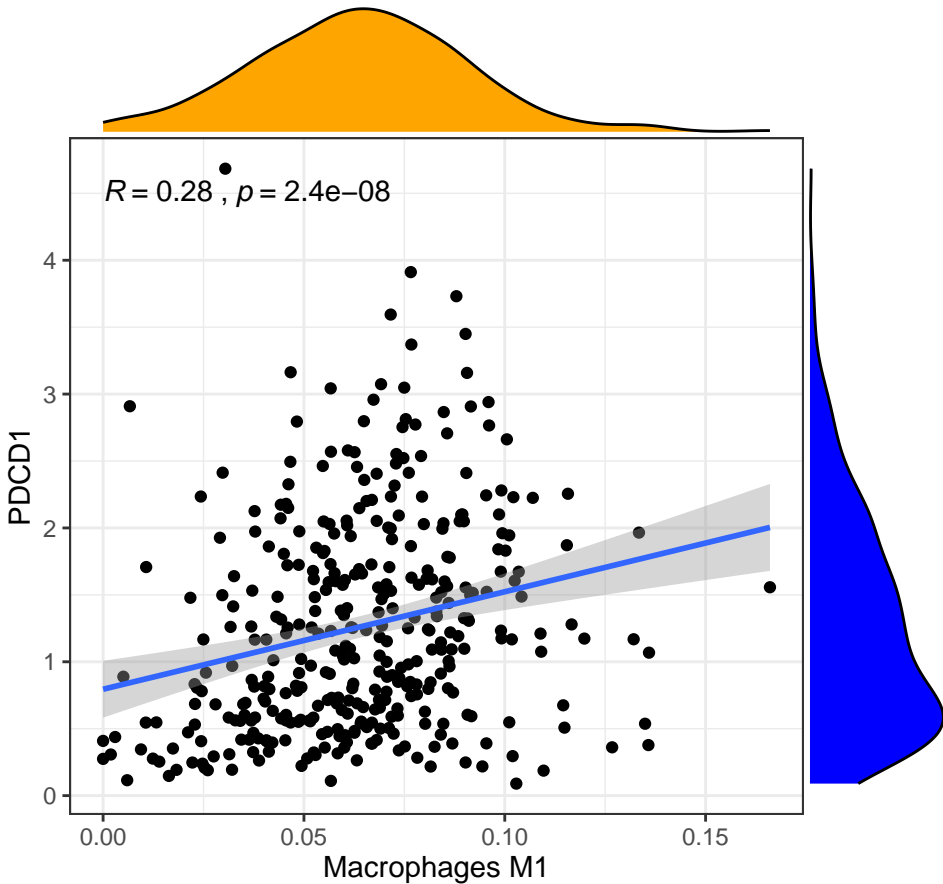

Cancer: STAD

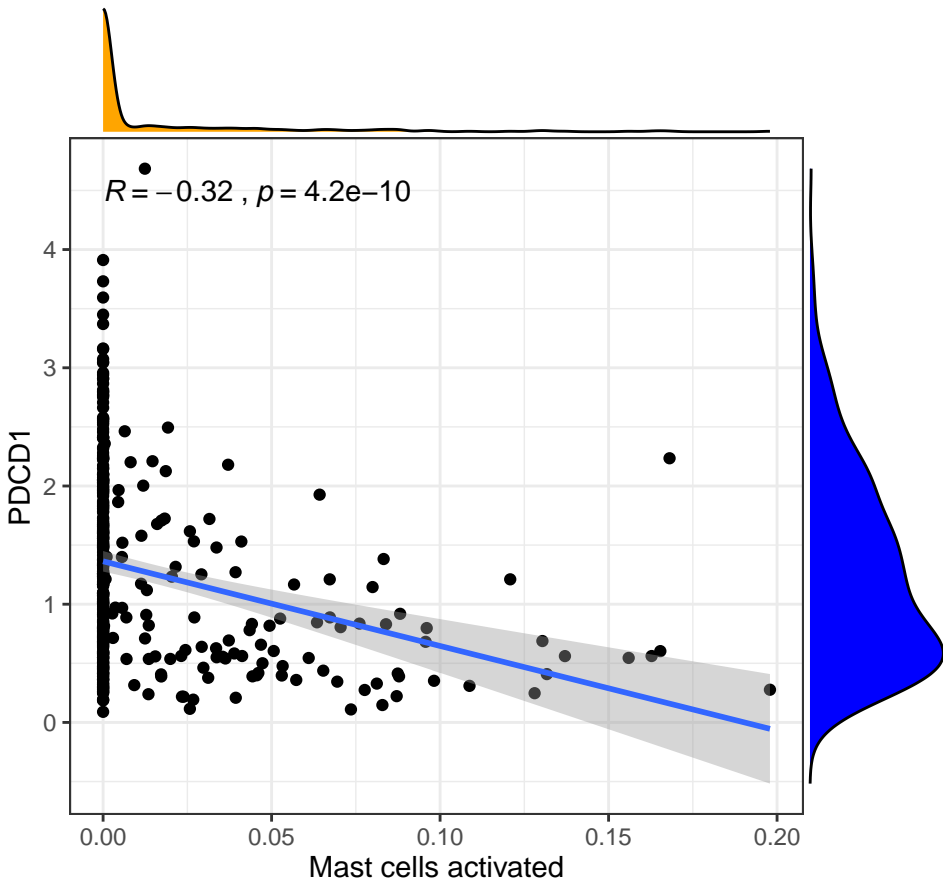

Cancer: STAD

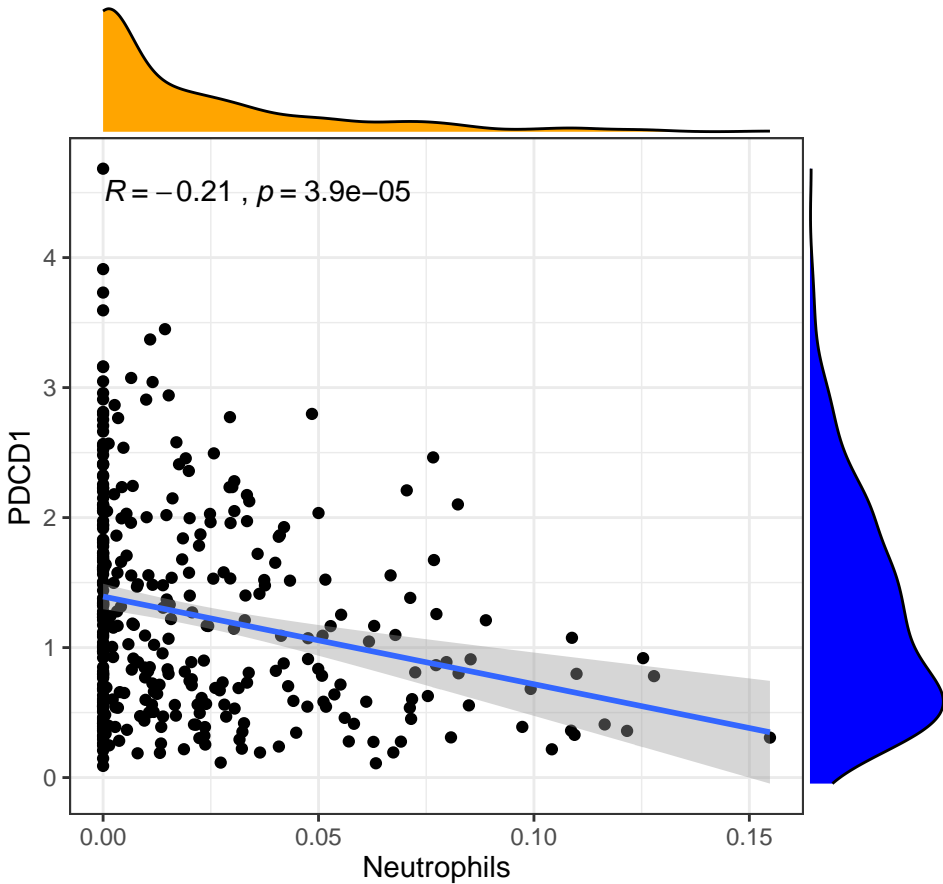

Cancer: STAD

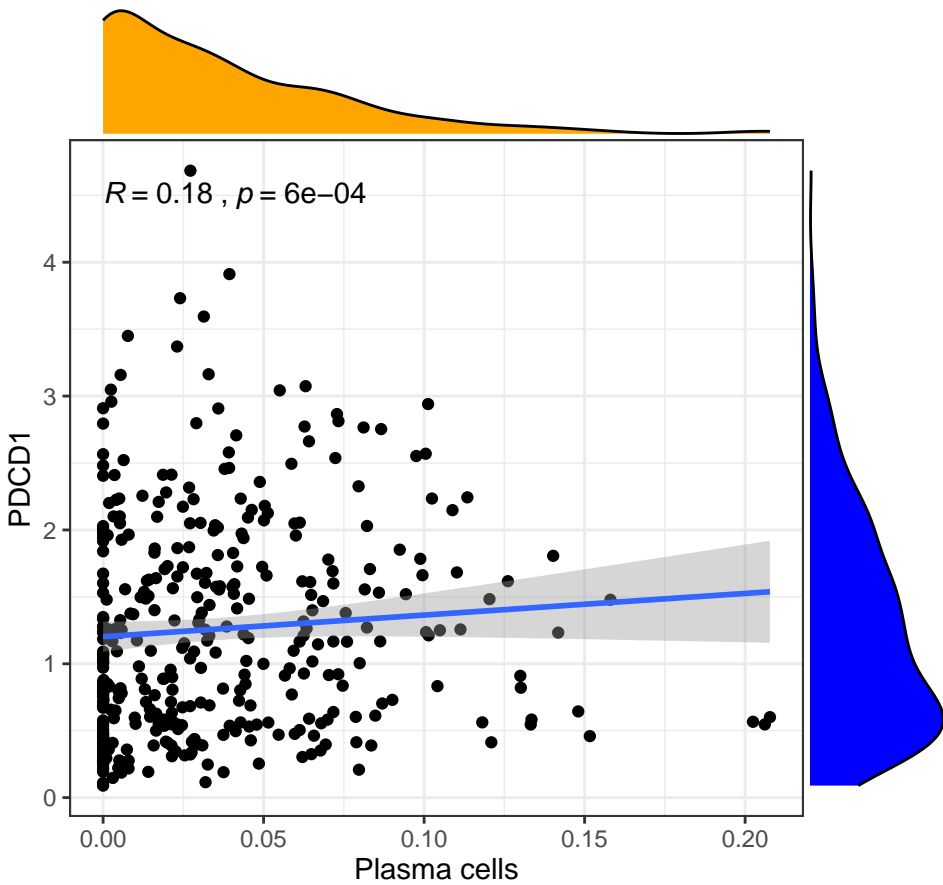

Cancer: STAD

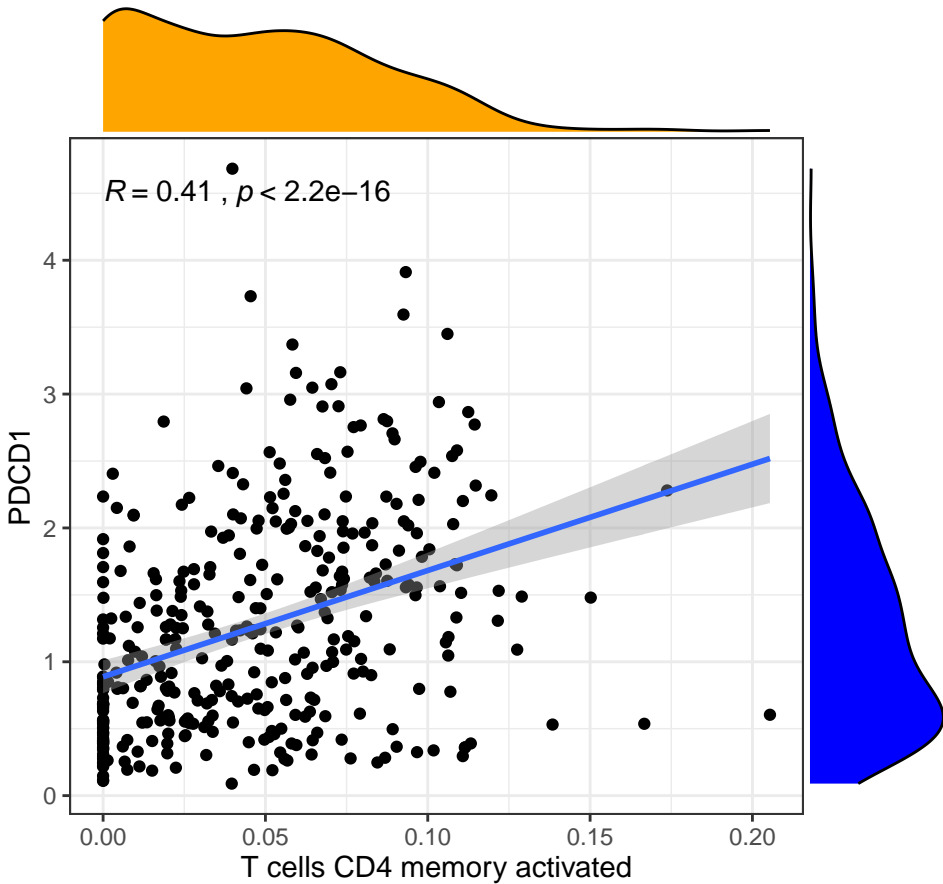

Cancer: STAD

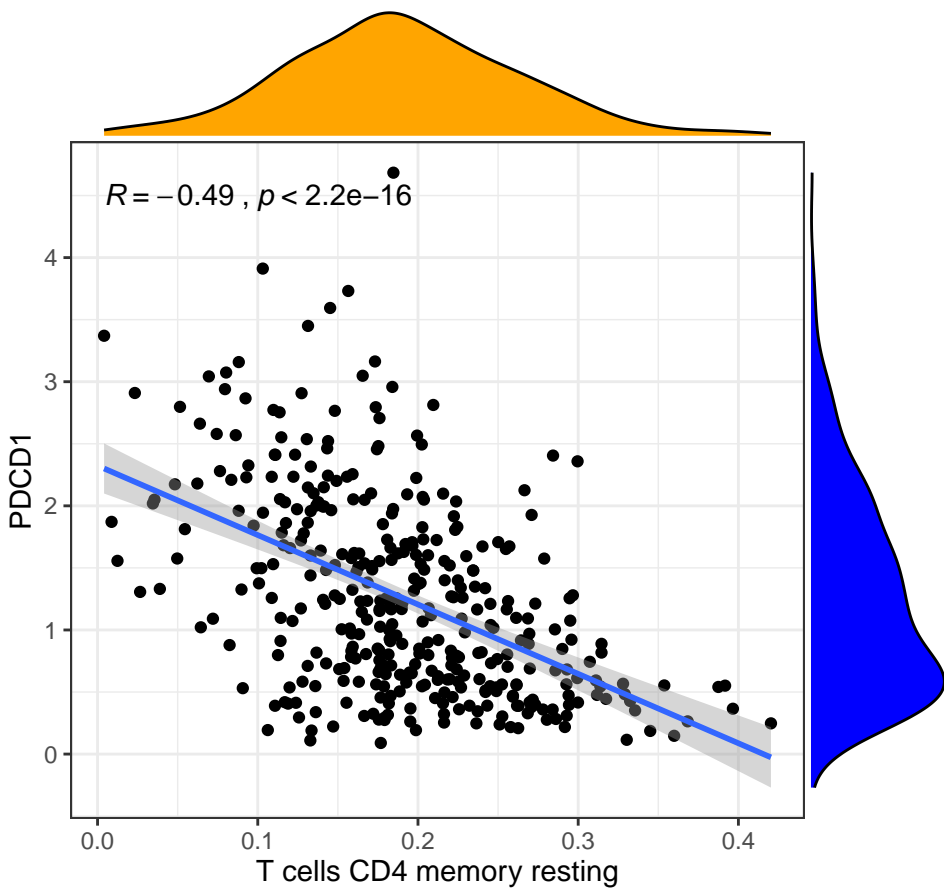

Cancer: STAD

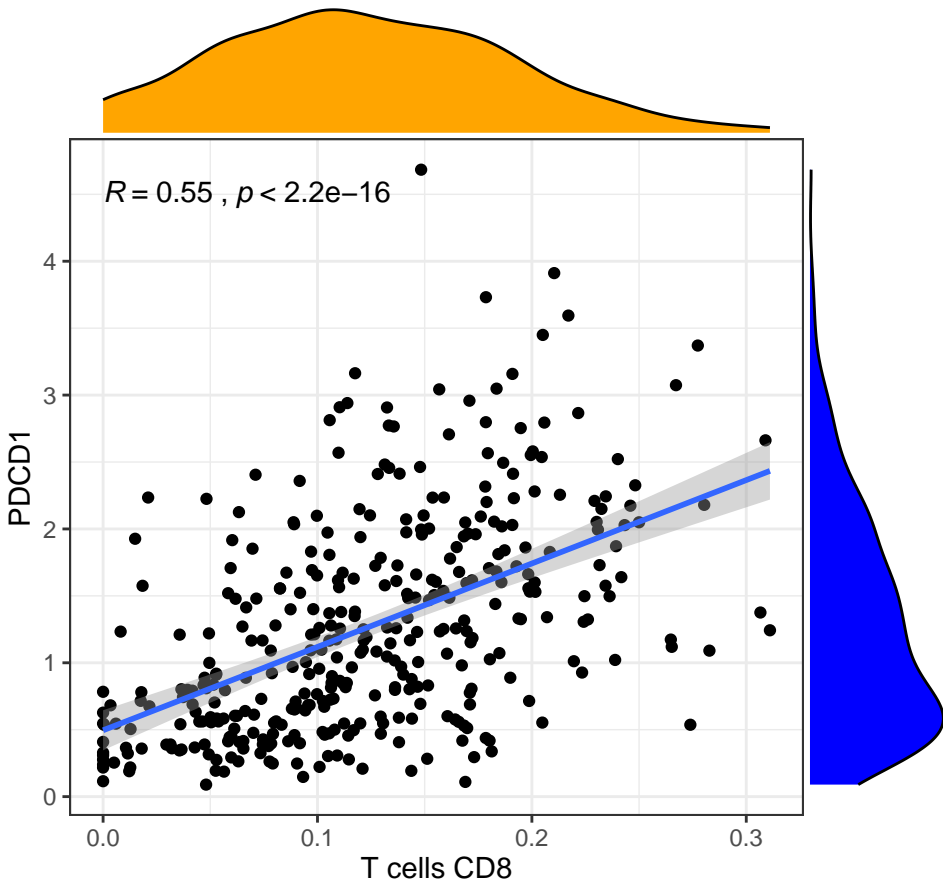

Cancer: STAD

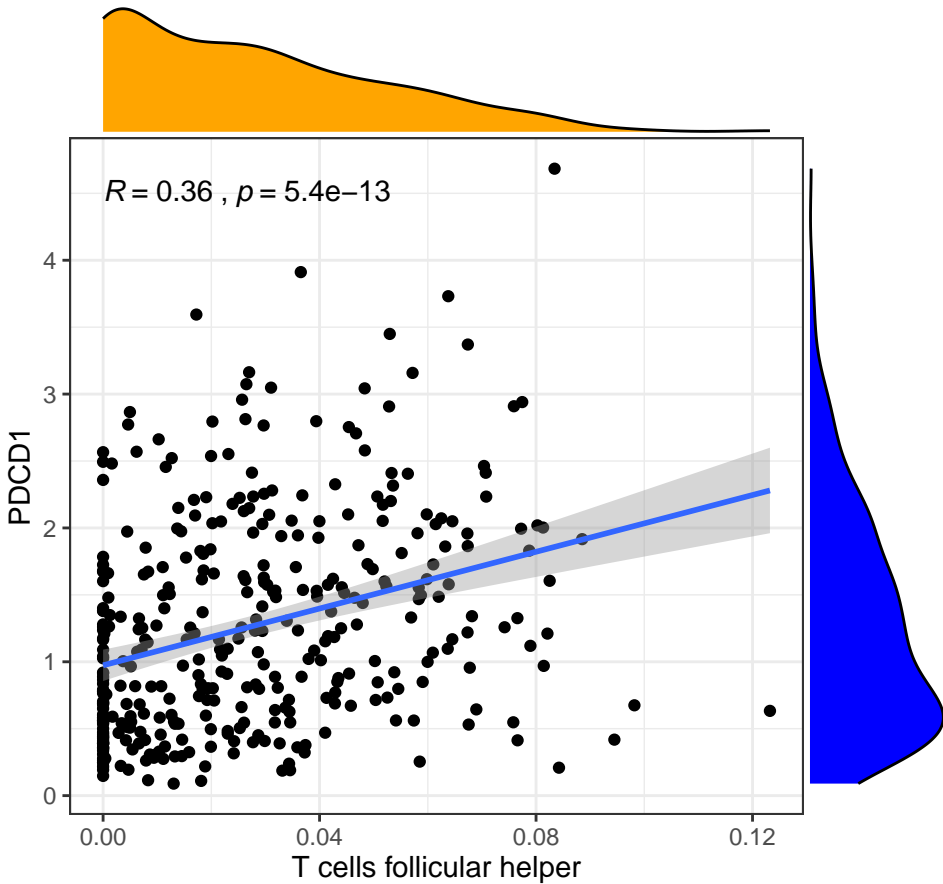

Cancer: TGCT

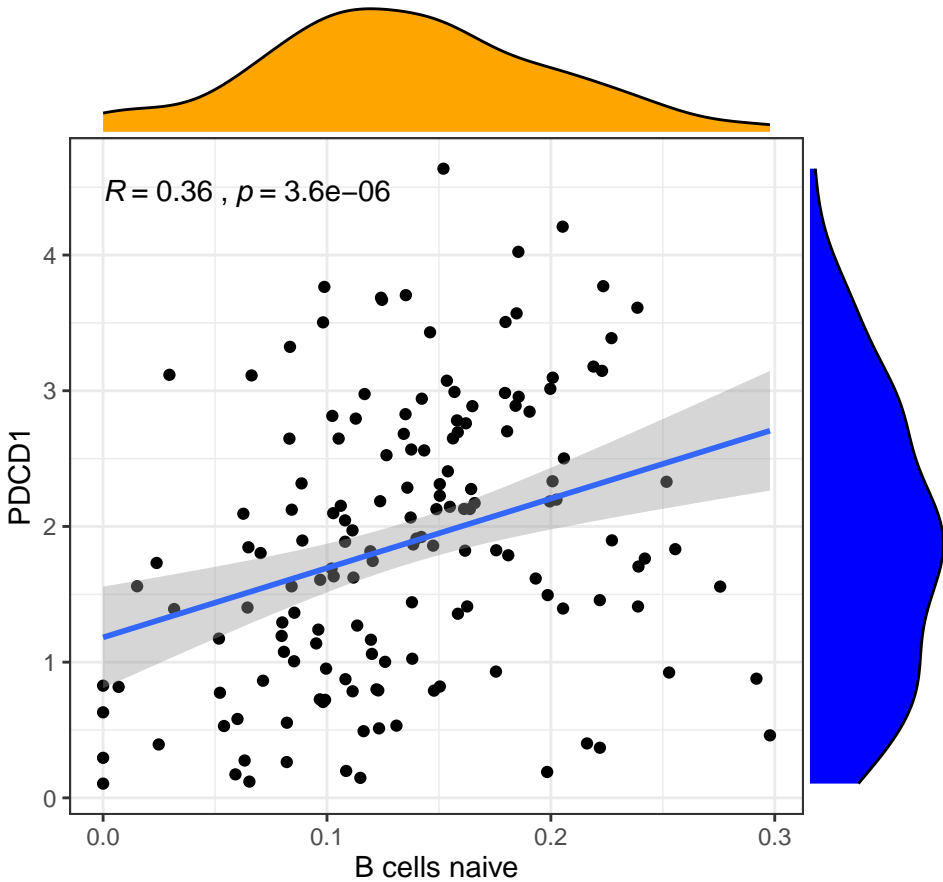

Cancer: TGCT

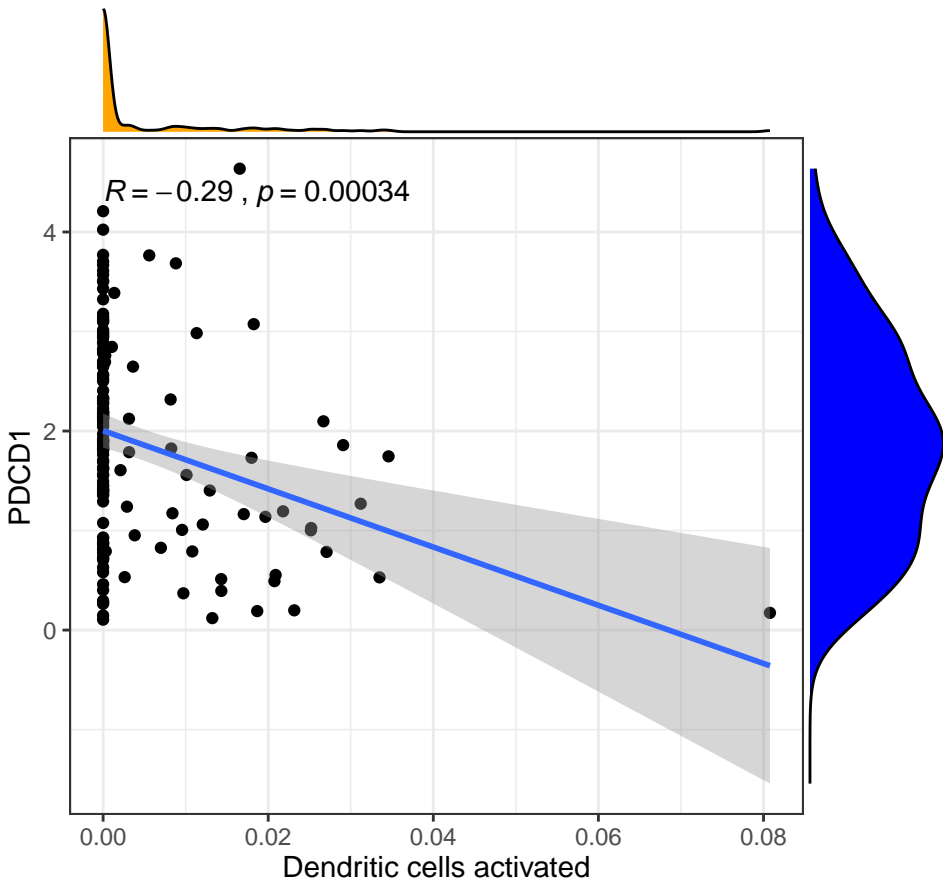

Cancer: TGCT

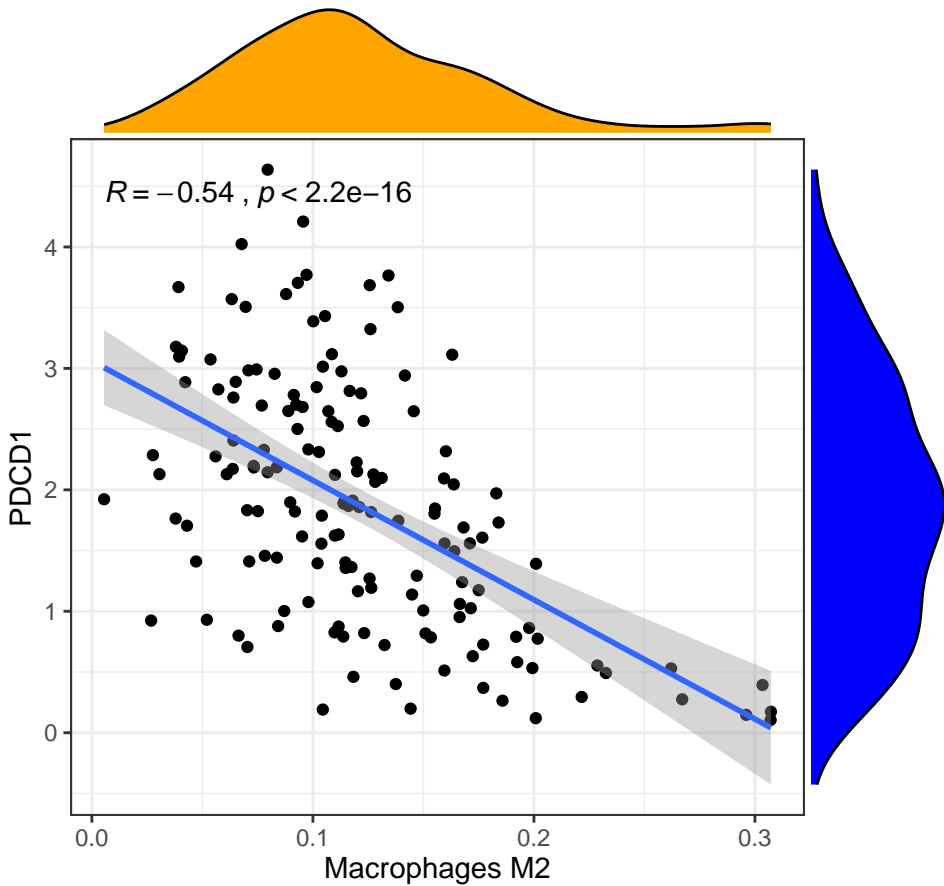

Cancer: TGCT

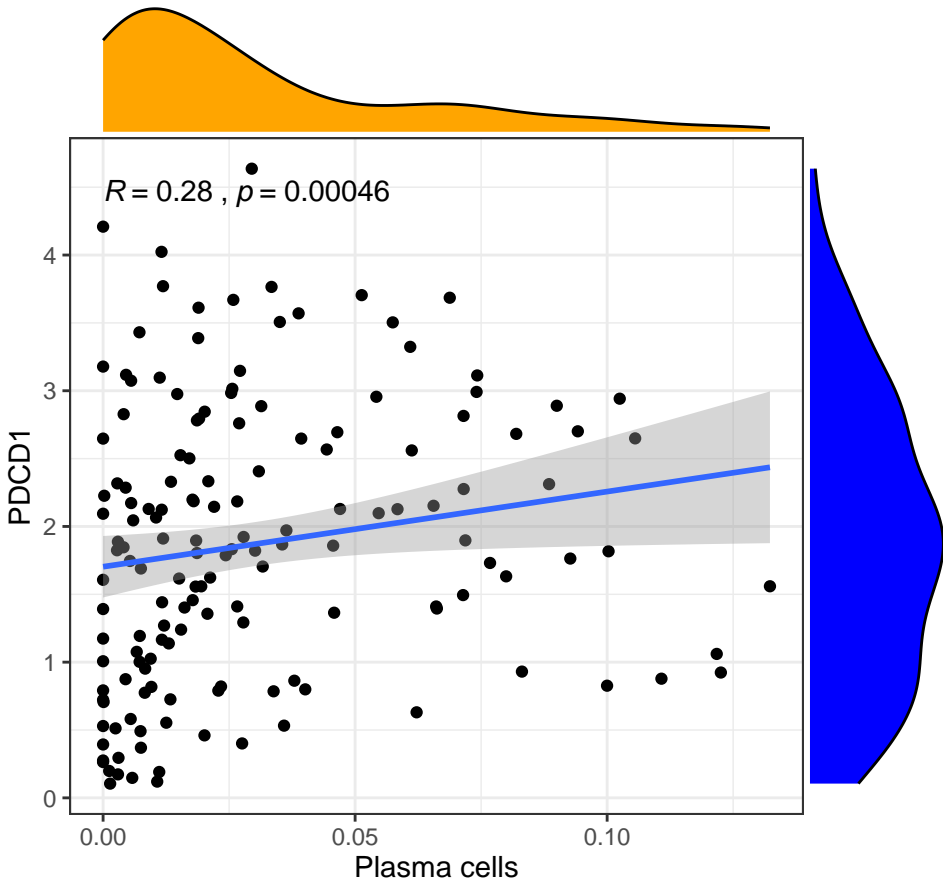

Cancer: TGCT

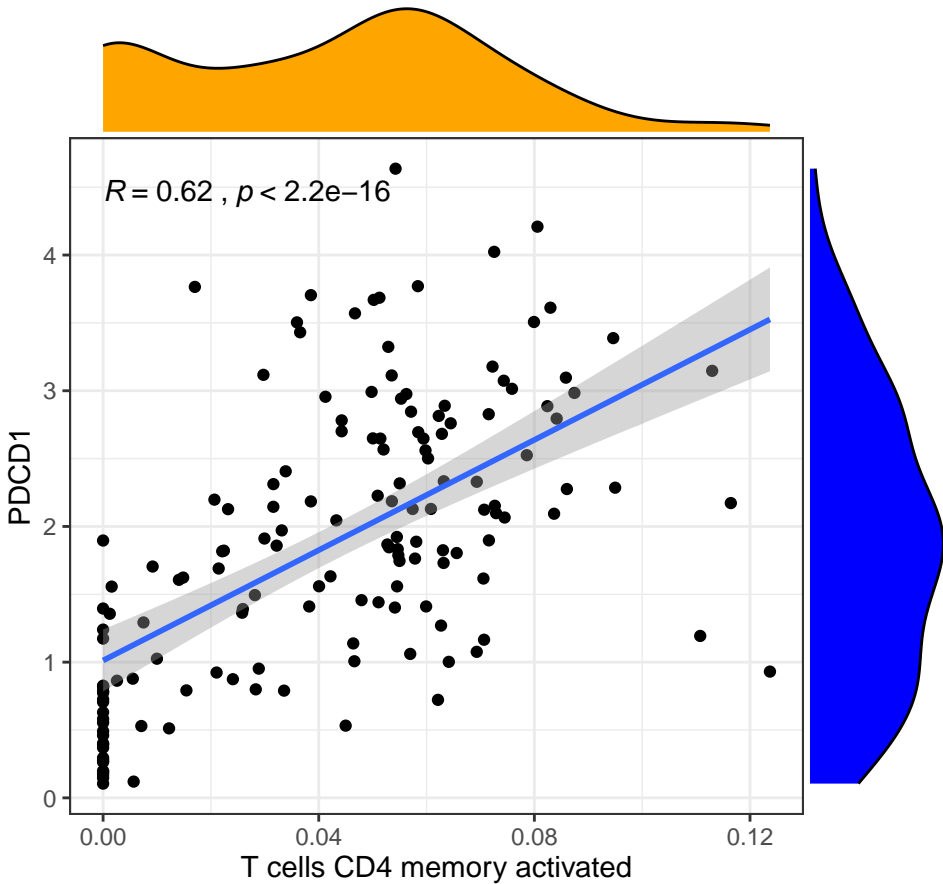

Cancer: TGCT

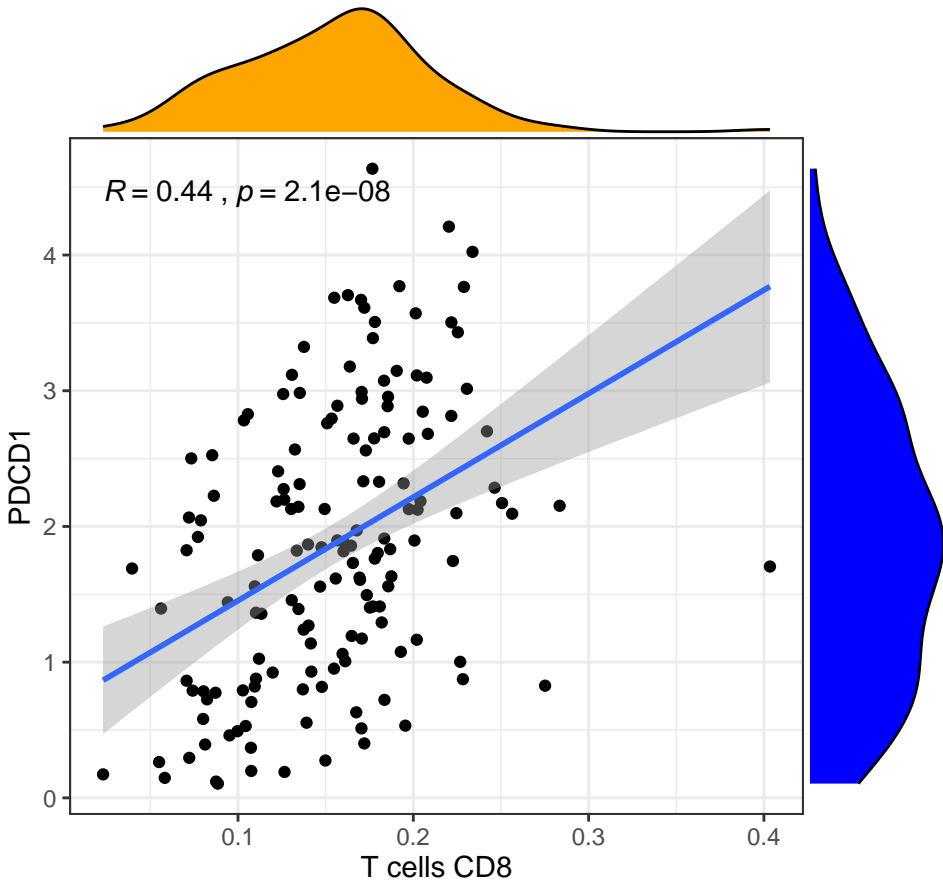

Cancer: THCA

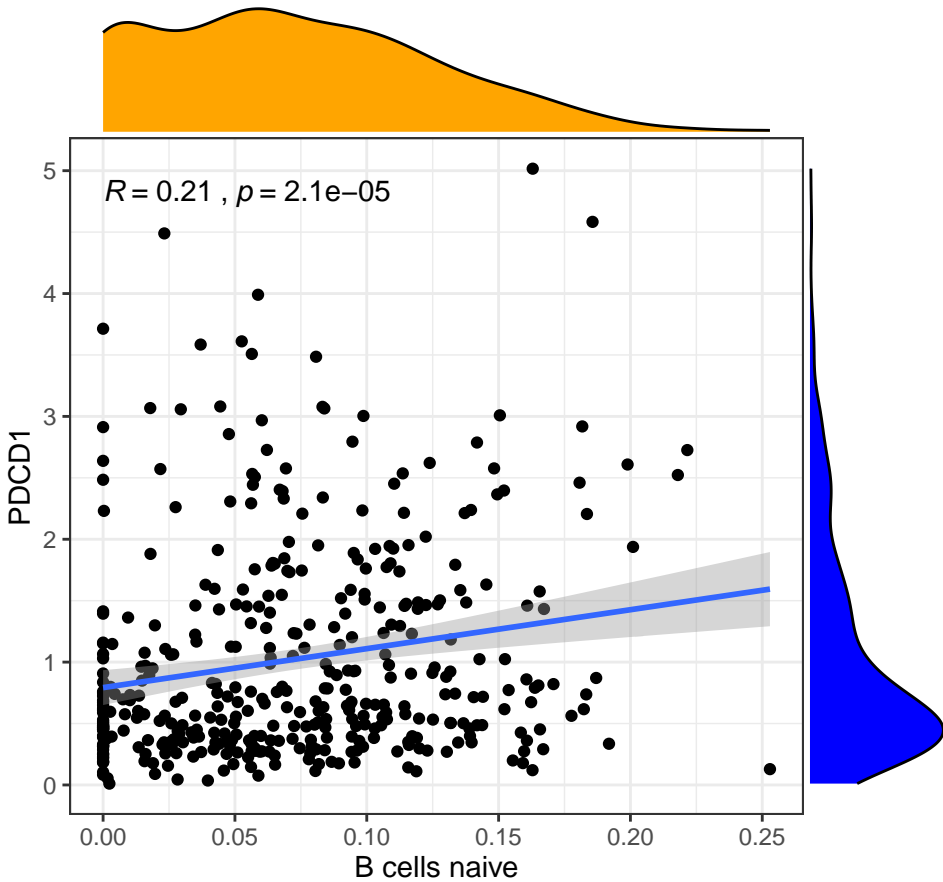

Cancer: THCA

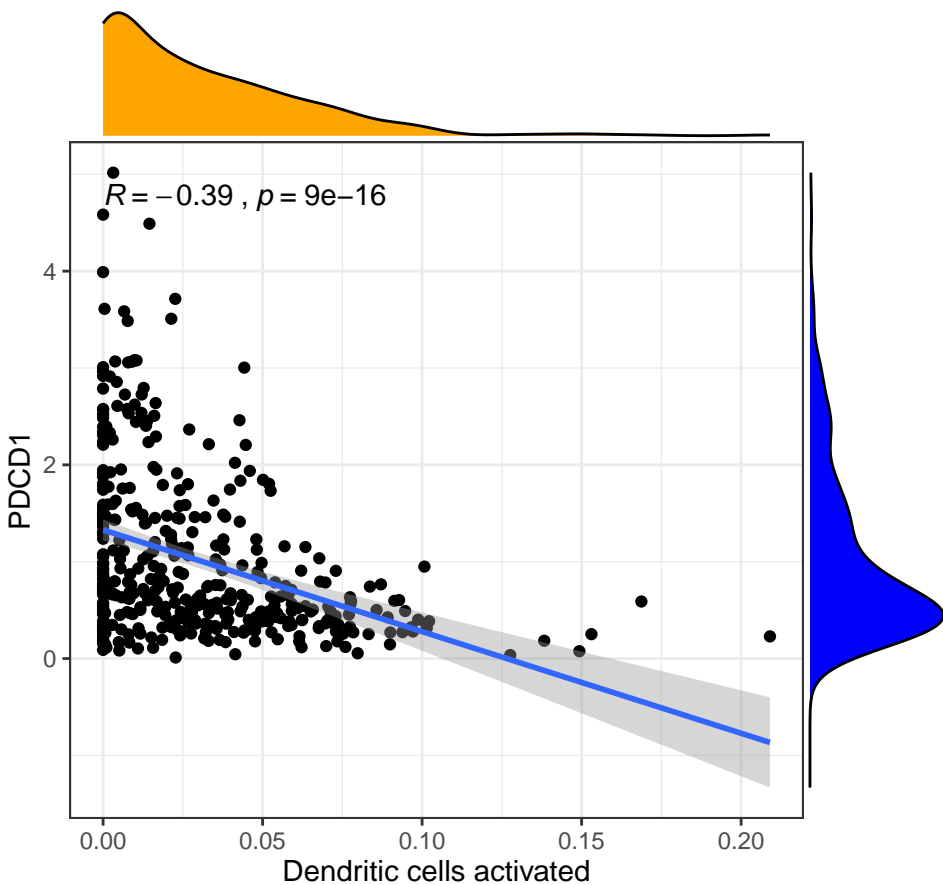

Cancer: THCA

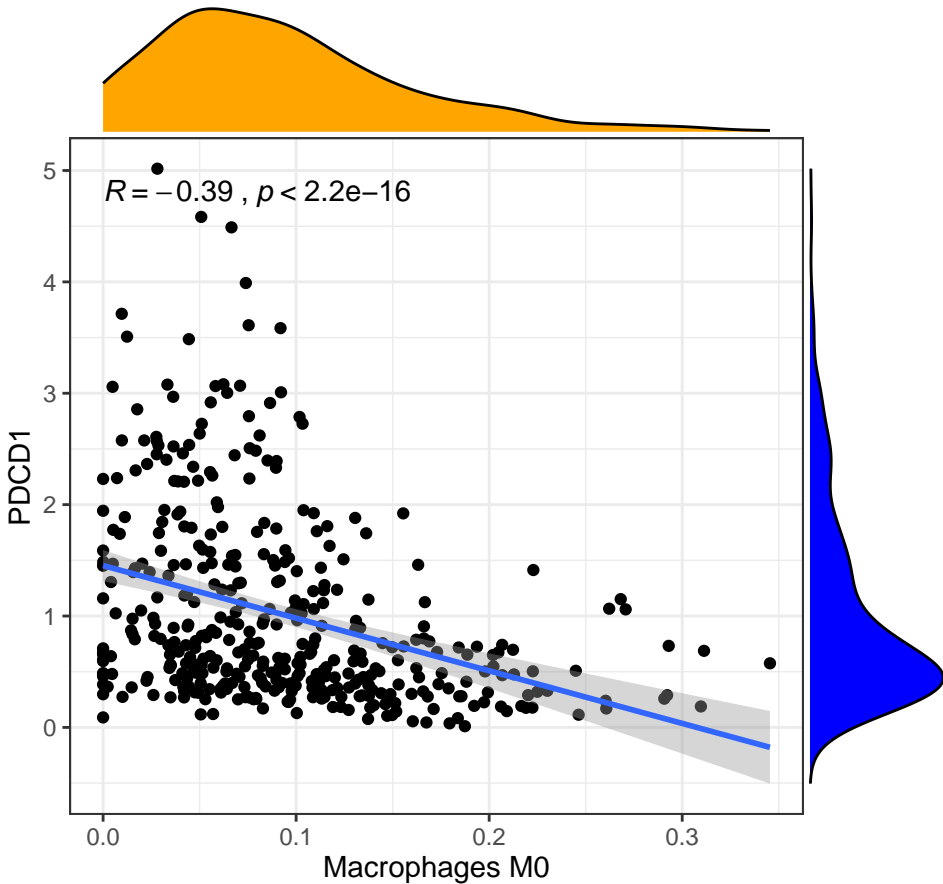

Cancer: THCA

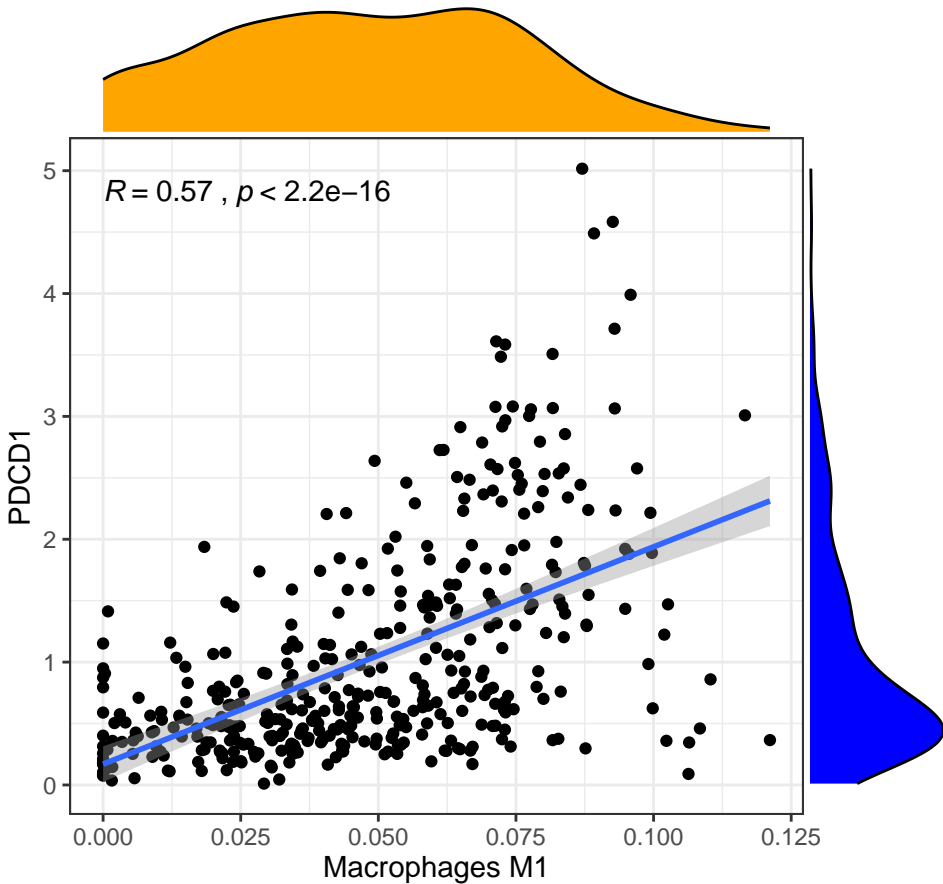

Cancer: THCA

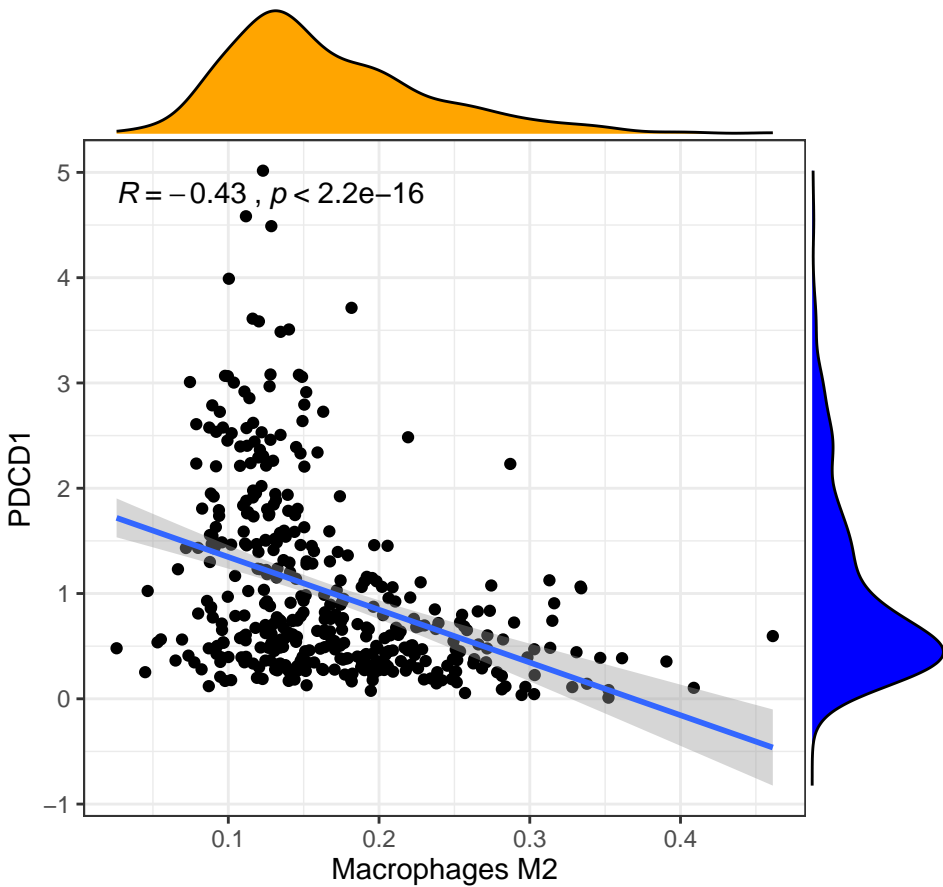

Cancer: THCA

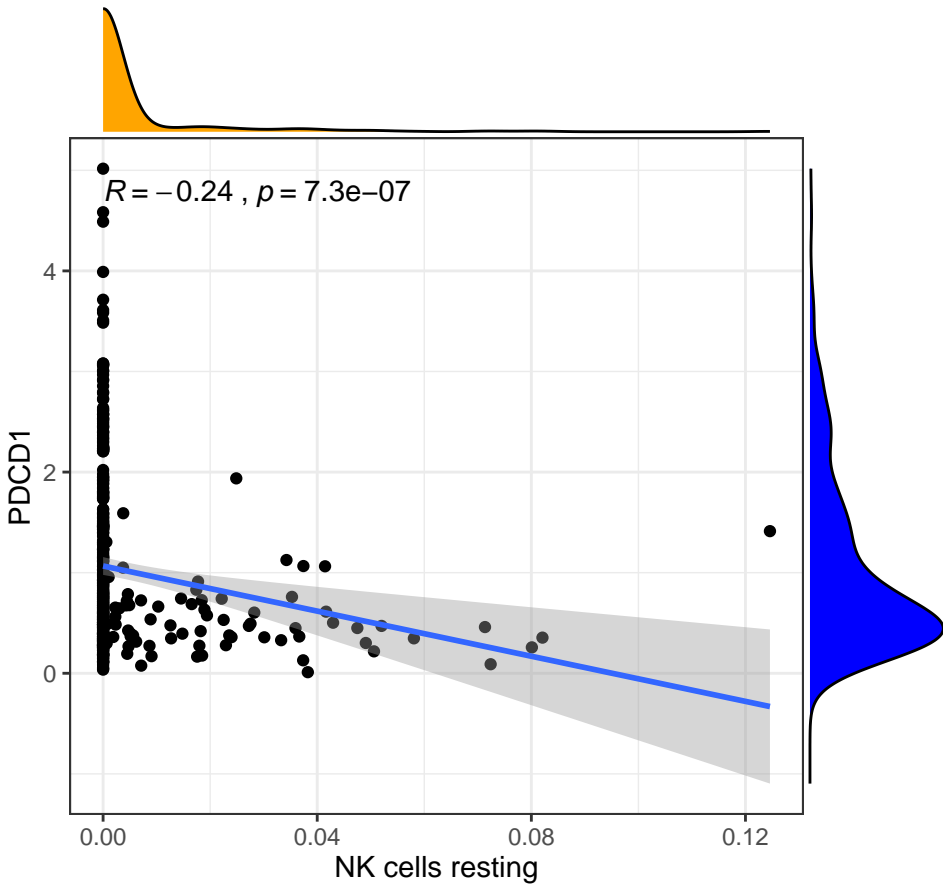

Cancer: THCA

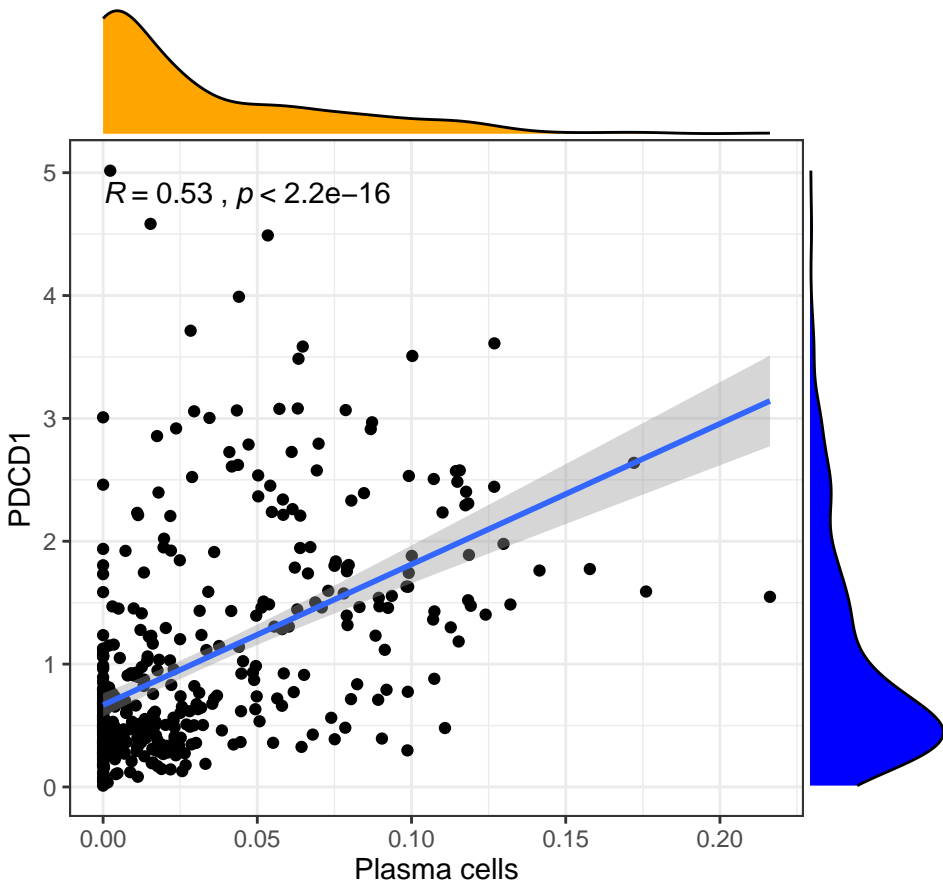

Cancer: THCA

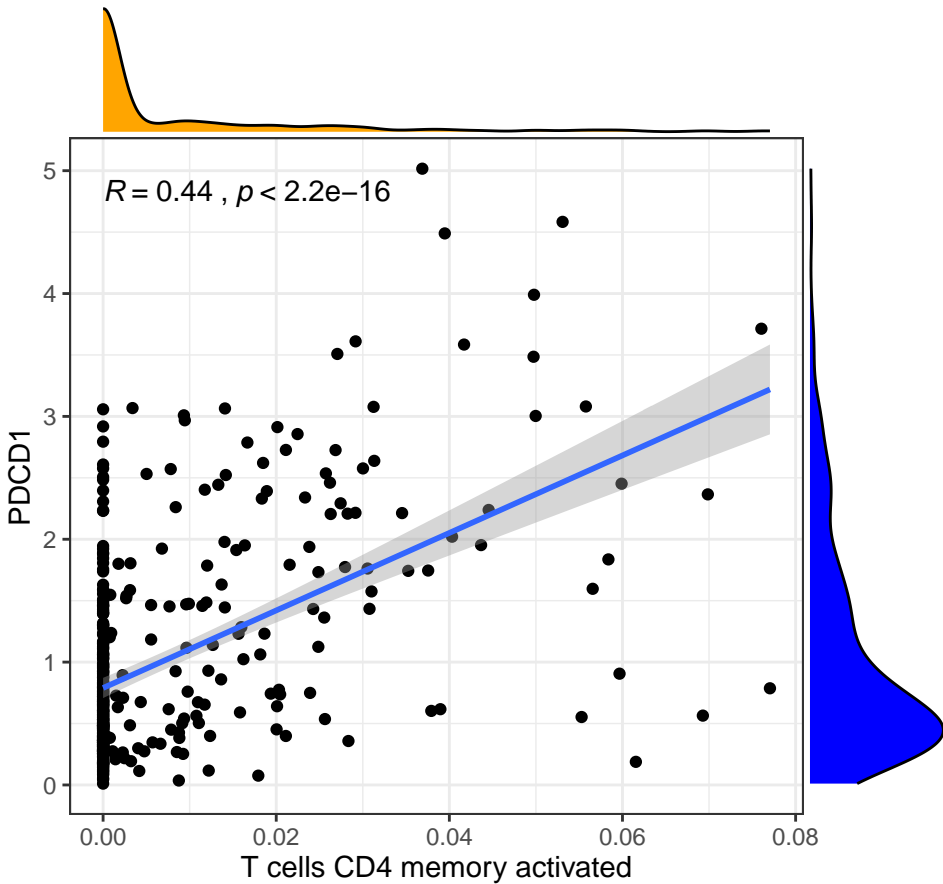

Cancer: THCA

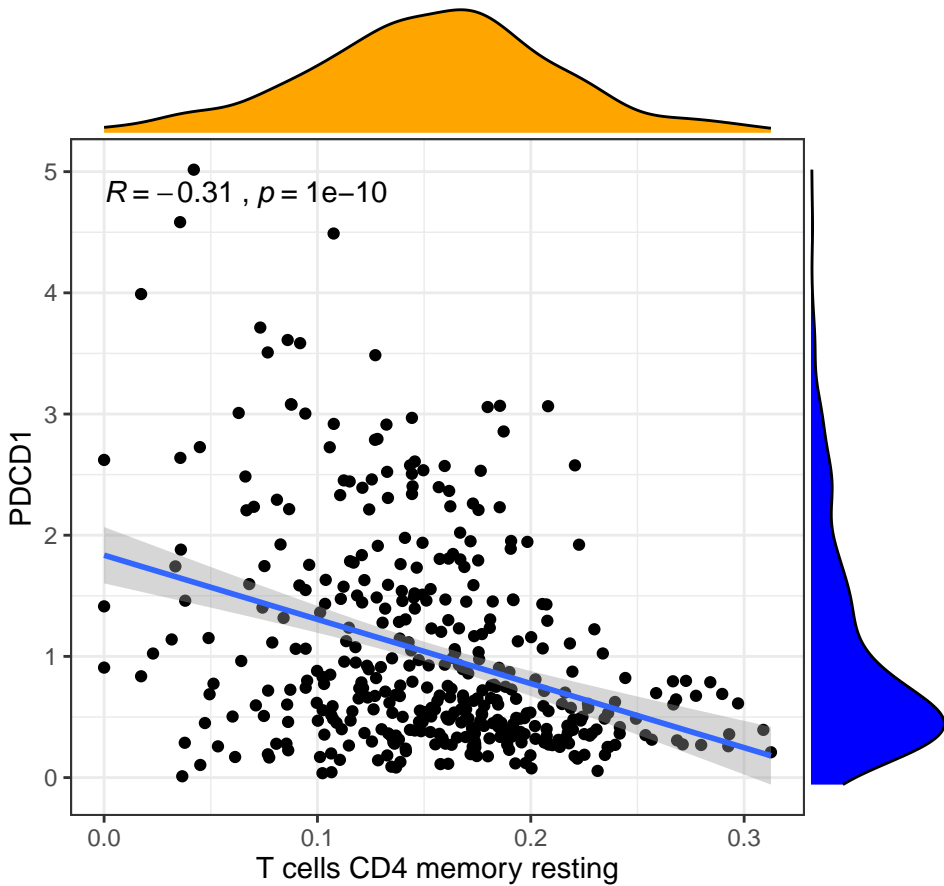

Cancer: THCA

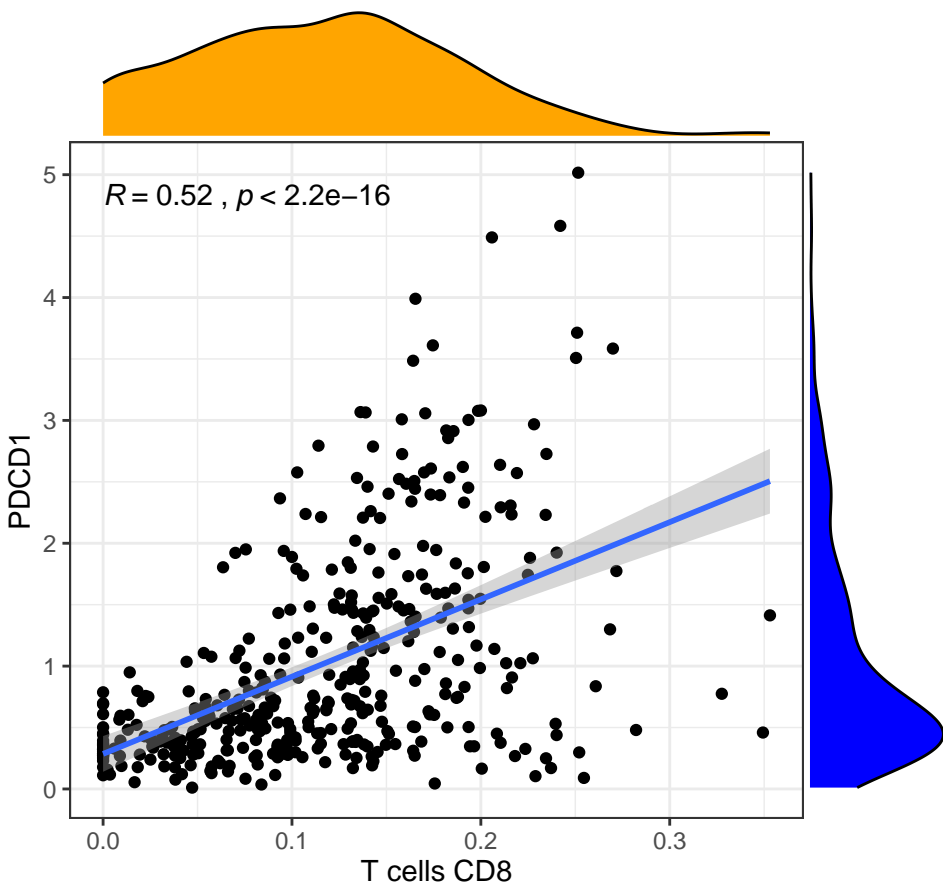

Cancer: THCA

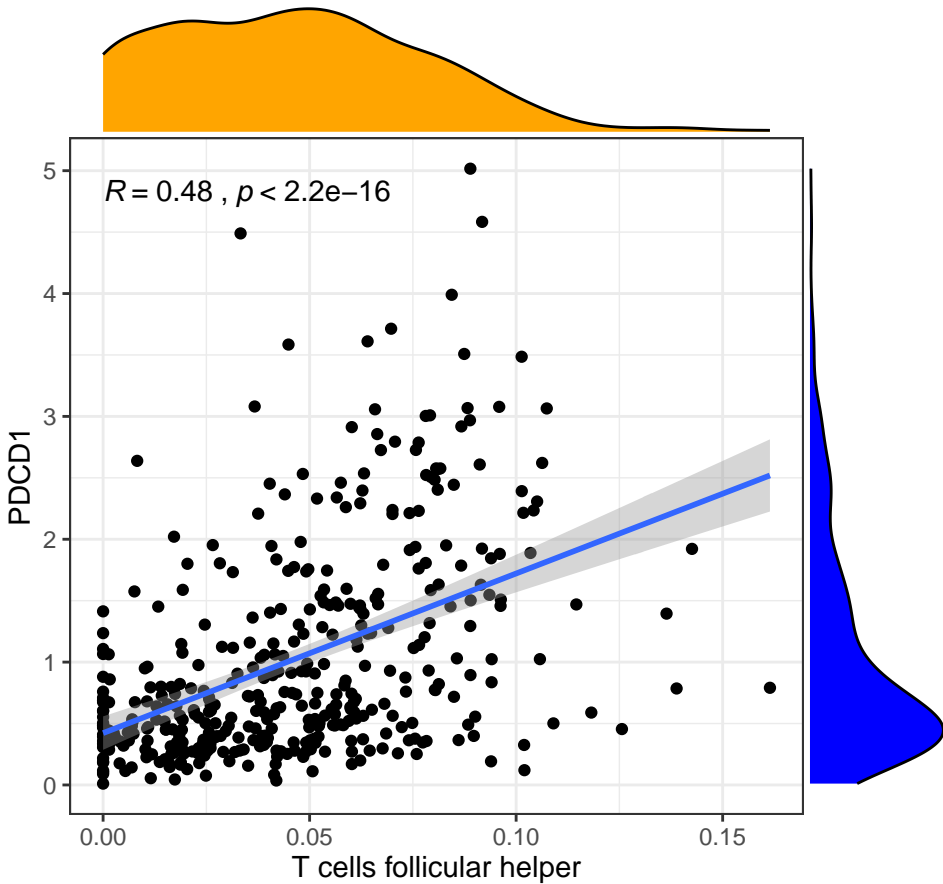

Cancer: THCA

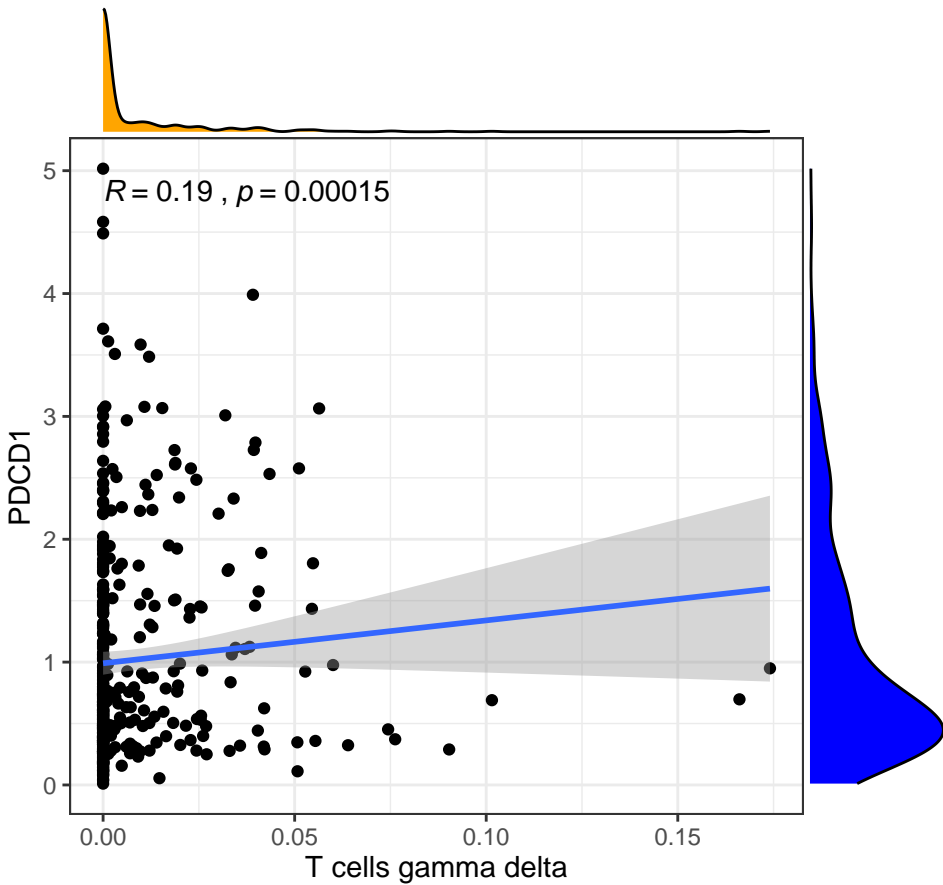

Cancer: THYM

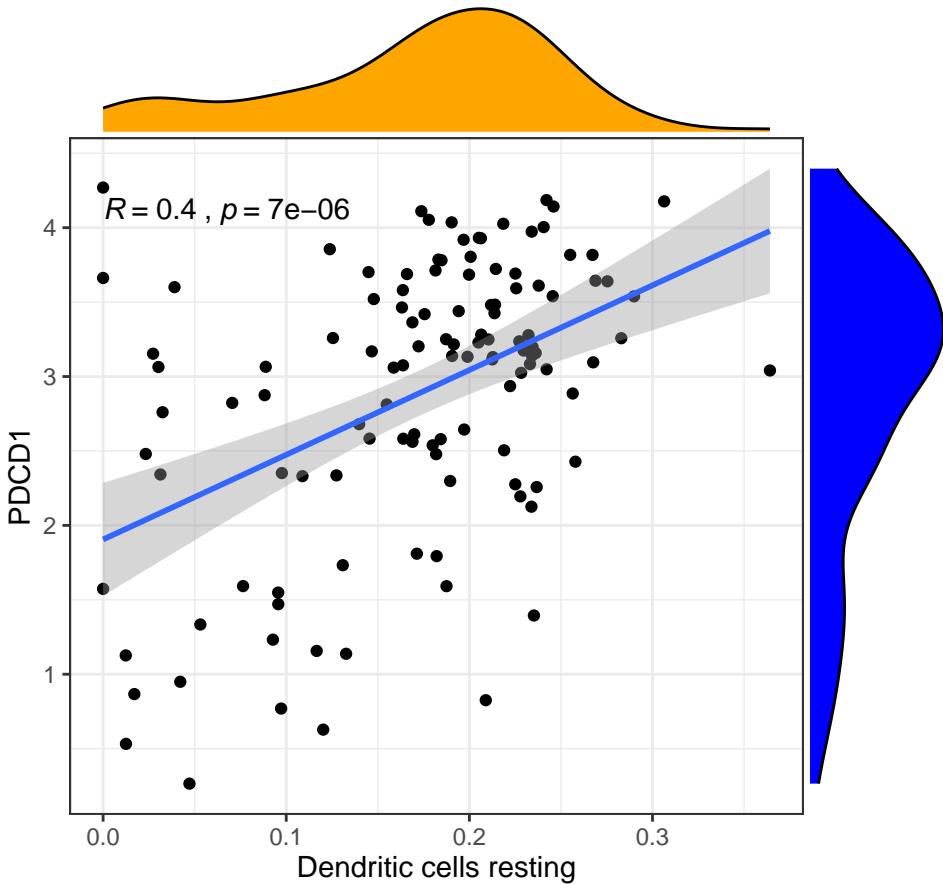

Cancer: THYM

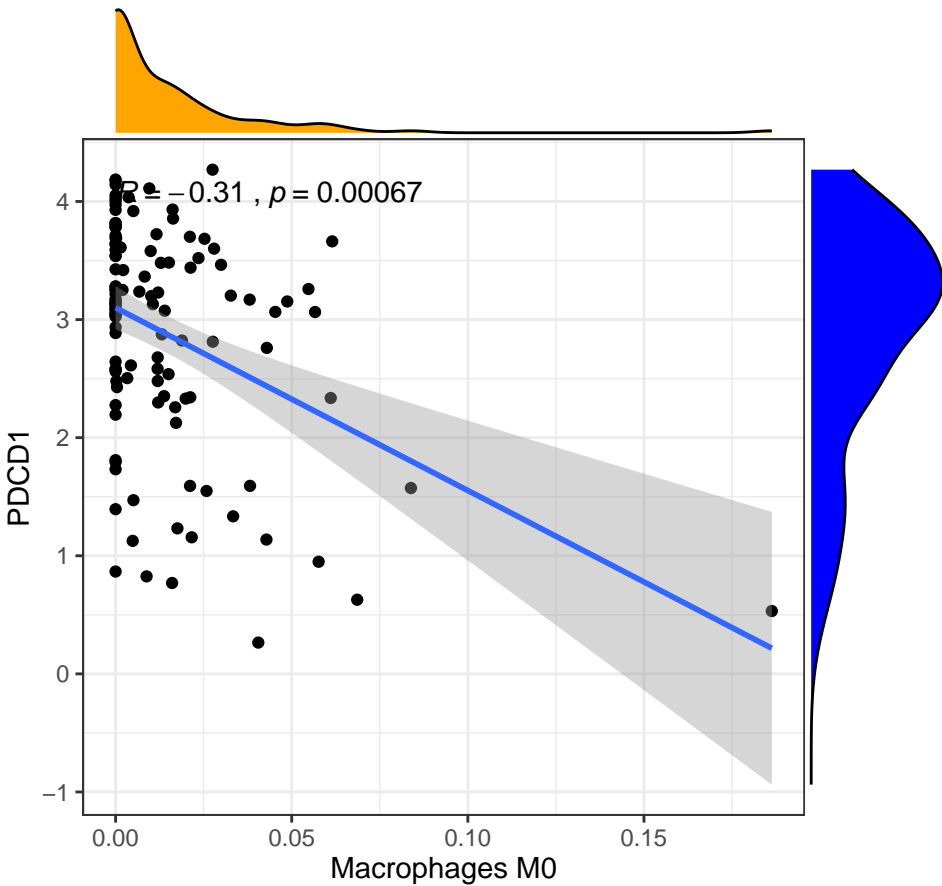

Cancer: THYM

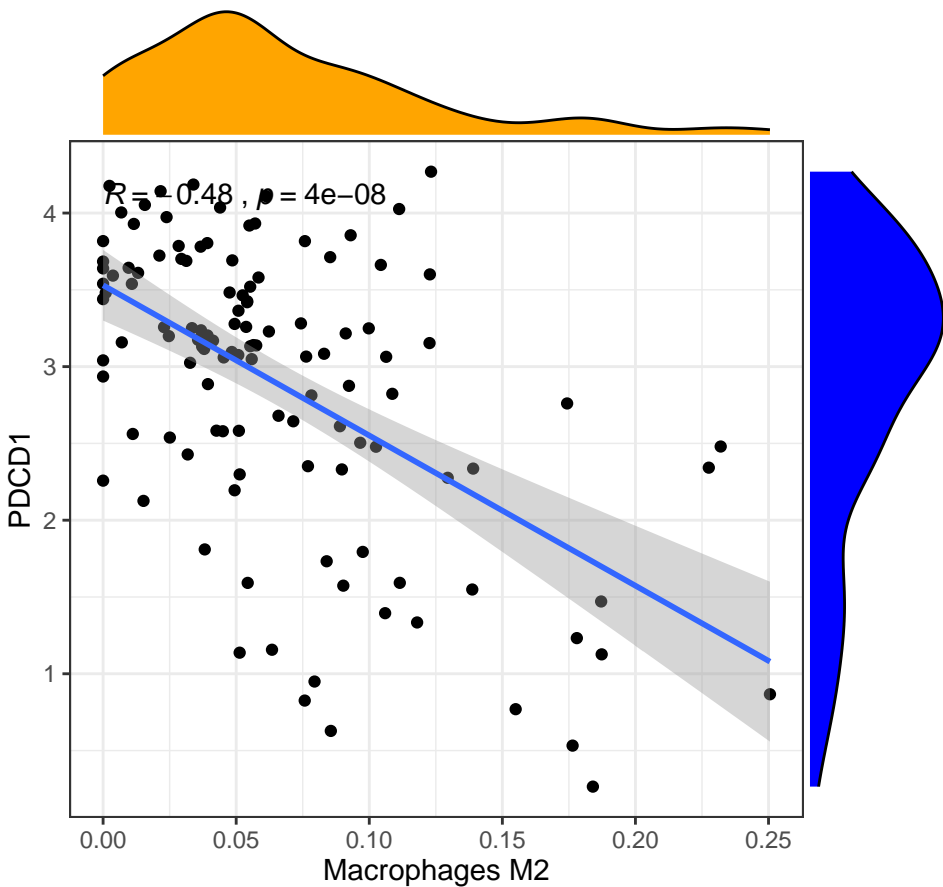

Cancer: THYM

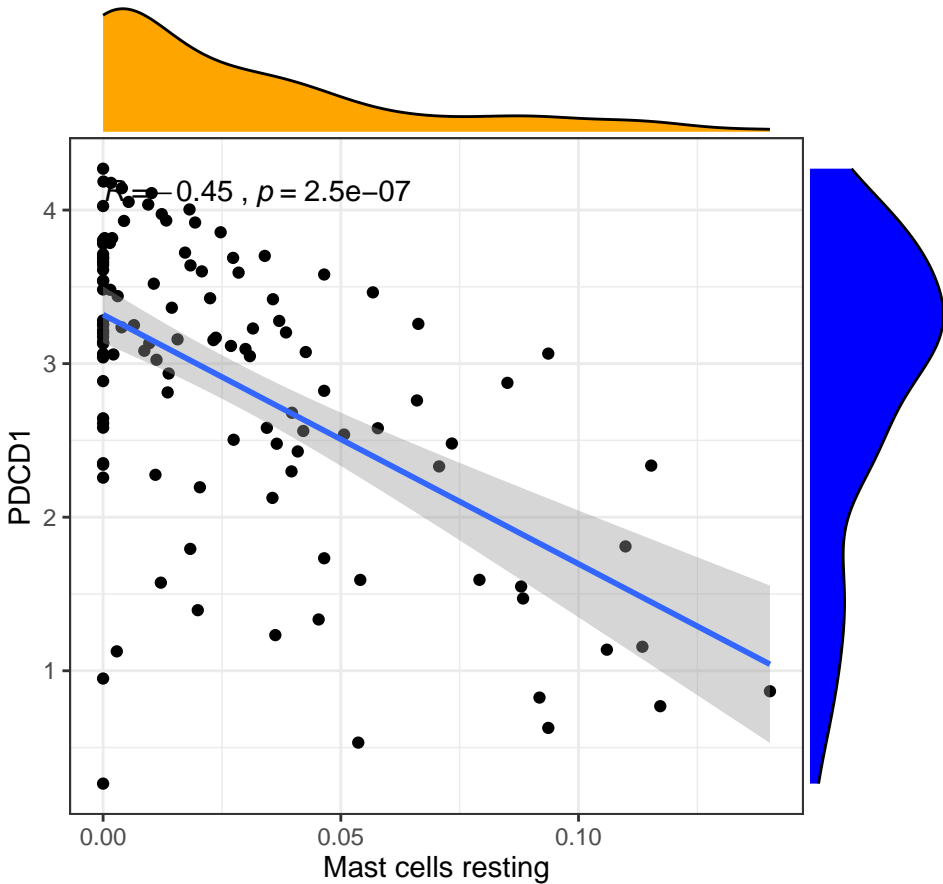

Cancer: THYM

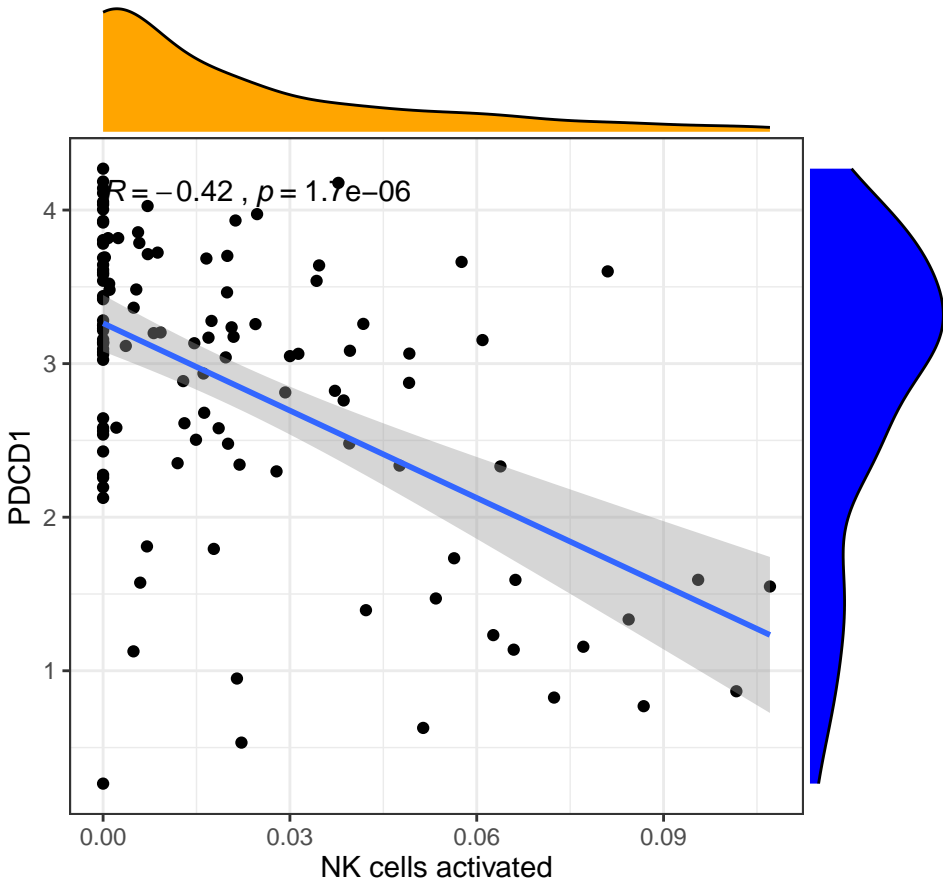

Supplementary Figure 3. The relationship between ICOS gene expression and immune cell infiltration.
